# Supplementary material for: A zebrafish embryo screen utilizing gastrulation identifies the HTR2C inhibitor pizotifen as a suppressor of EMT-mediated metastasis
Source: eLife. 2021 Dec 17;10:e70151. doi: 10.7554/eLife.70151 (PMC8824480; doi:10.7554/eLife.70151)
Supplement: Source data 1. [file elife-70151-data1.xlsx]

## Sheet: GSEA gene expression (TPM)
Human_Gene_Symbol	1k-cell-1	1k-cell-2	1k-cell-3	1k-cell-4	1k-cell-5	50%-epiboly-1	50%-epiboly-2	50%-epiboly-3	50%-epiboly-4	50%-epiboly-5	Shield-1	Shield-2	Shield-3	Shield-4	Shield-5	75%-epiboly-1	75%-epiboly-2	75%-epiboly-3	75%-epiboly-4	75%-epiboly-5
RPL24	132.774	146.153	188.464	154.927	146.474	273.036	265.311	255.662	235.386	262.9	308.846	331.057	267.388	288.58	287.231	414.515	394.292	323.038	448.608	371.64
CEP97	62.9128	76.8387	74.7601	85.9633	81.9599	37.2195	29.5768	32.4148	32.9745	36.0758	27.9842	28.4747	27.1728	30.5853	36.6095	38.3771	43.4323	36.9463	48.3248	38.627
NFKBIZ	2.50675	3.2967	4.34604	5.51391	5.45804	30.4511	24.7952	23.6152	22.3553	21.7517	22.3686	21.3188	19.9209	26.9336	31.3463	10.7651	15.4647	10.8442	15.5519	13.7601
EED	119.728	151.591	154.25	145.376	157.39	66.9542	58.7657	67.0067	66.9729	71.1319	68.4492	69.4931	66.3583	62.4998	72.93	70.8579	79.5861	62.4564	72.2156	73.3929
HIKESHI	15.3636	16.4221	16.6358	16.5409	16.6925	33.1602	38.6473	31.7739	24.74	35.3001	46.9753	54.6221	51.6601	49.0954	63.0486	88.3861	74.7851	43.079	88.9237	68.6624
TMEM39A	61.4847	78.1702	77.7486	87.0659	89.5534	61.1226	55.4209	62.2637	63.2395	55.038	50.8868	47.4849	54.2645	53.0763	55.3573	56.8189	60.8049	43.6326	62.7367	53.0986
ILDR1	41.2282	51.6216	51.7333	55.4583	56.2245	53.3201	61.6372	61.8415	59.5684	58.0013	68.4227	68.1797	62.9257	67.6477	78.6956	55.8348	56.1876	45.1117	53.8804	54.7325
ILDR2	4.89635	3.71292	3.95282	6.31079	4.87991	5.69287	1.45209	4.18598	4.79104	4.98477	1.57756	1.42651	2.5715	0.692899	0	2.25767	1.50129	1.42351	0.727261	1.6779
GPA33	5.45654	5.39915	4.88317	6.22593	5.32311	22.1281	23.5462	17.7311	18.3368	20.7575	24.6102	25.6705	24.3917	26.5372	28.5709	27.2969	30.8189	26.2136	26.6865	26.8867
F7	0	0	0	0	0	0	0.150172	0.141359	0	0.168012	0	0	0	0.279449	0.141621	0	0.45289	0.14409	0	0
F7	0	0	0	0	0	0	0	0	0	0	0	0	0	0	0	0	0	0	0	0
F7	0	0	0	0	0	0	0	0	0	0	0	0	0	0	0	0	0	0	0	0
F10	0	0	0	0	0	0.31041	0.158572	1.04518	0.852443	0.177469	0.337602	0.30535	0	0.147595	0	0.321411	0.63789	1.06538	0.935748	0
PROZ	0	0	0	0.320765	0	0	0	0	0	0	0	0	0	0	0	0.306394	0	0	0	0
PCID2	32.9237	46.3079	37.9595	35.3522	40.5356	38.0346	45.2323	43.5915	46.1348	35.7373	41.8471	42.0754	36.2149	33.2575	30.316	38.8348	31.7241	33.3277	32.3782	31.7251
CUL4A	16.6581	24.9785	15.7347	17.3825	21.3311	16.492	12.1442	14.2902	15.9903	15.2863	13.086	19.4342	16.2579	19.069	16.4644	22.9168	21.0608	16.023	22.0916	22.58
LAMP1	9.21496	13.1711	16.878	12.3042	13.8782	5.12257	8.02132	8.59589	7.93379	7.07767	2.9902	3.71844	7.59443	8.18299	4.64268	3.2049	4.95557	2.35969	3.79611	3.17093
GRTP1	18.8373	23.7653	21.1159	20.3006	16.9002	16.4629	10.3815	10.1839	15.6567	13.2704	5.97806	7.00888	7.54991	6.97214	8.83237	1.05415	2.09303	0.998226	1.4317	3.04897
ADPRHL1	0	0	0	0	0	0	0	0	0	0	0	0	0	0	0	0	0	0	0	0
DCUN1D2	7.95934	8.85352	7.40895	9.24561	8.48237	9.10019	6.7253	9.69849	9.58489	13.5244	9.69937	7.62837	9.92839	10.881	9.71924	9.63709	11.7588	8.93594	10.3237	14.9638
TMCO3	29.4636	38.1777	38.4937	39.6315	36.2369	10.1793	10.4004	12.0604	13.7706	9.27524	7.05795	4.20744	8.46166	5.46965	6.53893	5.34488	3.78822	4.33887	5.03907	4.75563
TFDP1	67.2866	87.3557	87.4333	91.9201	76.326	101.504	96.2522	99.6684	99.9915	94.488	86.0961	74.2817	95.333	85.8798	89.6762	60.2538	69.7427	50.6209	65.0597	65.5526
GRK1	0.17914	0.449807	0.556576	0.220794	0.343038	2.04205	1.6693	1.37269	1.23125	1.51476	0.665086	0.601562	0.899283	0.775041	0.196409	0.316531	0.104651	0.199875	0.307302	0
CENPE	14.1141	14.8418	12.1218	14.4391	16.5112	23.5168	25.7432	17.8688	22.6428	25.695	42.5258	42.4004	50.0705	53.0339	48.4437	65.6097	67.5357	70.5574	54.6737	64.9402
GAS6	4.74967	5.17717	4.14794	2.99219	4.77751	2.7659	4.23929	3.87521	4.04492	3.28958	2.12793	1.47181	1.92963	3.17294	1.77447	3.09794	4.37321	3.72419	2.77598	3.31256
PROS1	85.2154	89.5401	89.3449	84.8842	93.9206	90.0381	93.2842	93.1742	91.6146	89.3935	77.7976	72.2334	75.5746	75.4002	74.7437	40.4749	43.5804	29.9516	36.893	41.1904
RASA3	0	0	0	0	0.163389	4.95325	7.44241	4.20319	4.95915	7.32702	7.28616	10.888	10.5406	11.2173	6.87789	11.9127	10.324	9.56849	9.95172	12.0751
TPP2	101.683	98.1134	85.3328	109.396	111.178	52.8668	64.9961	64.5727	62.8412	62.3796	32.5251	33.2688	34.2634	37.1218	34.9283	17.5799	20.6913	19.5485	17.813	19.6314
METTL21C	0.300843	0	0	0	0	0	0	0	0	0	0	0	0	0	0	0	0	0	0	0
BLZF1	110.033	124.309	124.768	136.884	147.152	141.562	138.921	137.574	149.925	141.932	114.349	116.098	111.736	120.5	117.625	92.5534	89.5505	90.0832	88.136	95.8883
TRMT10C	13.868	17.9658	14.2254	13.6041	18.1368	9.86489	5.65283	9.28551	6.09864	7.17584	8.66058	11.156	10.8698	10.3335	10.0062	10.9972	10.1767	11.1228	11.1503	14.4603
TXNL4B	57.6418	55.5687	59.0451	56.5431	54.1105	12.495	12.7622	14.2161	18.9987	14.6714	12.1298	15.0844	12.0706	13.8016	12.1024	15.886	12.0515	17.2283	15.1226	11.8923
MRPL16	11.6731	8.86959	11.3728	9.51415	11.3798	12.5616	9.2044	13.4515	11.45	9.09495	15.5058	14.0238	17.6822	14.3539	17.1891	18.4609	26.803	20.7055	30.5674	30.0238
MRPL39	12.6174	13.5665	16.4782	18.3515	15.989	13.0729	17.1232	15.4852	11.7883	14.1881	18.2359	15.834	17.6139	18.1791	19.8796	19.6193	21.8833	19.5666	22.4075	23.174
VSIR	85.756	89.3573	105.202	104.582	101.179	37.2883	39.477	35.4371	37.846	42.9341	25.461	30.1381	20.3887	22.9525	24.915	11.0584	7.44638	8.44216	5.87693	9.13239
ATP5PF	10.5986	16.2543	13.0115	10.7208	12.7196	28.9419	22.7612	21.5364	20.7703	23.6137	27.51	30.8861	21.3218	20.7591	20.7538	35.541	31.7204	27.09	34.7486	27.82
APP	0.52969	0.709063	0.656822	0.940594	0.974492	14.7427	13.7647	9.83426	13.2793	13.7476	22.817	21.5582	22.6907	23.8092	24.3296	23.9978	34.4921	32.4276	24.6472	27.6811
CYYR1	0.778897	0.785287	0.494747	0.49236	1.52596	66.0005	60.5074	55.4038	66.8317	67.9932	78.9138	82.071	93.4732	97.2672	75.7521	85.5551	86.063	96.5395	80.5692	101.553
ADAMTS1	2.05629	2.92567	2.44833	3.167	2.40562	0.585916	1.29721	0.656337	0.535179	0.557117	0.318002	0.383506	0.429967	0.741125	0.46954	0.201791	0.300208	0.382268	0.195913	0.336578
ADAMTS5	0.222323	0.111678	0	0	0.426422	0	0	0	0	0.43457	0	0	0	0.120456	0	0	0	0.124236	0	0
RUNX1	0	0	0	0	0	0	0	0	0	0	0	0	2.63439	0	1.43558	0	0	0	0	0
CLIC6	4.82029	4.87306	6.99954	3.87975	10.4011	3.5015	4.28715	2.05893	1.57095	4.08621	0	2.10495	3.16179	3.40778	0	0	0	1.40032	0.715455	0.825221
ATP1A1	138.89	144.289	137.092	141.923	137.049	151.97	154.318	149.792	147.743	153.568	152.885	164.891	161.631	161.238	157.781	135.512	138.022	110.574	118.861	138.217
ATP1A1	1.61901	1.7072	2.0108	1.99402	1.75567	0.737974	0.282789	0.531335	0.505449	0.631405	0.200229	0.181106	0.406075	0.262477	0.354762	0.285872	0	0.0902595	0.277557	0
ATP1A1	0	0	0	0.0806472	0.0835488	0	0	0.0716404	0.0817743	0	0	0.0732563	0	0.0707699	0	0	0	0.0730167	0	0
ATP1A1	0.112306	0.112829	0.139801	0	0	0	0	0	0	0	0	0	0	0	0	0	0	0	0	0
ATP1A1	0	0	0	0	0	0	0	0	0	0	0	0	0	0	0	0	0	0	0	0
PTGFRN	2.4349	4.28144	2.42648	2.70825	4.20655	1.52841	1.56164	1.20237	0.610142	1.27026	1.05725	0.54643	0.980522	1.45248	1.20454	0.143783	0.427977	0.136177	0	0
MBNL2	0.992895	1.49533	1.07755	1.37357	1.26492	0.706657	0.216642	0.0677891	0.619015	0.161101	0.766371	0.623864	1.18103	0.535705	0.950365	2.26109	3.3269	2.76364	2.47898	2.51399
RAP2A	0	0	0	0	0	0	0	0	0	0	0	0	1.89521	0	0	0	0	0	0	0
IPO5	272.186	300.2	266.05	292.066	298.735	327.427	329.243	343.712	339.586	328.13	333.994	321.841	341.542	329.782	316.812	389.84	355.135	330.643	357.827	399.938
GGACT	1.69217	1.48942	2.38695	1.05357	0.817594	5.57114	3.21653	2.80452	2.93652	2.22292	4.22751	3.8235	5.79363	4.62382	2.10852	3.01957	2.99877	2.3826	6.34502	2.23976
GGACT	3.68985	1.85482	2.30588	2.91312	3.2307	4.41022	4.11371	4.80205	2.10923	2.63462	1.67043	4.34363	3.39022	2.37415	1.85087	5.36807	1.57886	2.44758	5.78675	4.64443
GGACT	7.48947	4.30519	5.90379	5.59684	4.13635	0.980269	0	0.236477	0	0.562313	0	0	0.217124	0	0	0.254612	0.252865	0	0	0
GPC5	2.65048	5.338	4.82965	2.95447	1.52739	0.338301	0	0.327474	0	0.389468	0	0	0.300887	0	0	0	0	0	0	0
SLITRK6	0.134194	0	0.167313	0	0	0	0	0.147397	0.336605	0	0	0.301437	0.270481	0.145701	0.295352	0	0.31485	0	0	0
SPRY2	2.2855	3.93879	1.22383	2.22703	2.30525	52.9961	51.2821	51.2173	50.2804	59.3871	48.7604	52.1869	52.6125	58.2825	59.4285	48.9423	58.5656	43.2335	56.8699	58.9608
NDFIP2	0.463036	0.597756	0.902743	0.569586	0.75867	14.5401	14.0116	11.2037	12.6235	12.9694	21.9816	22.1736	22.2043	24.9913	24.1039	27.2208	34.0877	29.8365	29.2266	35.6274
TUBA4A	10.0604	9.64154	6.92199	8.37151	9.58771	27.1845	28.8879	22.2793	26.3611	23.0223	35.9826	35.7978	28.2551	36.4794	32.7093	121.096	114.907	115.464	117.968	107.42
STK16	28.0232	25.6215	28.2249	35.3369	37.8287	21.3065	21.7651	25.3031	20.2549	19.2832	17.1148	21.671	26.4052	19.679	22.3272	20.2564	25.8933	26.4563	23.0355	21.759
ATIC	34.9381	35.8856	30.5678	36.25	30.5456	21.3942	24.9828	22.5208	24.4545	22.6924	21.586	23.0284	26.8347	24.5551	24.0311	47.1565	45.8682	36.6785	36.1836	46.4368
FN1	0.310253	0.428185	0.336139	0.523565	0.493204	0.176495	0.586216	0.422899	0.434393	0.200987	0.525905	1.55679	1.31819	1.25297	1.43962	8.87206	9.06581	9.56829	6.76106	7.84008
CPO	0	0	0	0	0	0	0	0	0	0	0	0	0	0	0	0	0	0	0	0
NRP2	0	0.129807	0.240569	0.0795061	0.0823673	0	0.225689	0.141255	0.0806175	0.0839238	0.159691	0.288881	0.0647635	0.209305	0.0707266	1.1399	0.753547	0.935792	0.51655	0.675951
PARD3B	47.9268	48.7547	38.755	50.1606	50.1562	37.8591	40.1223	42.5258	41.1709	36.8996	24.2018	21.0028	24.3216	27.0592	21.248	14.0086	16.879	17.2985	13.701	14.6542
ABCB6	71.9093	86.7073	62.3286	80.5456	79.2396	68.0905	73.2162	64.7909	75.7009	72.9276	52.1428	41.5472	44.8338	70.6878	49.2321	43.878	49.5466	44.7745	36.8503	56.6867
CNPPD1	179.742	174.662	164.535	183.074	191.25	58.1597	62.033	55.1592	73.1097	59.7107	66.4424	76.2093	83.7582	75.144	75.3374	54.4245	56.9958	51.876	52.8107	55.6225
PRKAG3	0.221873	0.669652	0.556814	0.553051	1.43047	1.27088	2.59628	1.96274	1.9618	1.75024	1.10948	2.50862	1.57696	1.69906	1.72171	3.43417	1.31188	1.00049	1.28087	1.17573
RETREG2	51.0755	45.5046	45.0323	41.1823	43.8475	9.38668	7.07486	6.80937	11.8317	7.0378	5.35528	5.29777	5.0254	6.43837	8.00876	7.16966	8.85368	7.0919	6.95793	6.55661
MDH1B	0.202562	0.814955	0.507632	0.50409	0.26081	0	0.473742	0.223657	0.510923	0.265903	0	0.22869	0	0.221227	0	0	0.239116	0.912029	1.16775	0.267905
FASTKD2	19.6732	21.7235	25.9208	18.9719	23.9245	2.41054	5.33554	4.45159	3.75771	4.14149	2.18813	2.77067	1.59883	2.29674	1.74573	6.04229	7.23947	3.74876	7.47886	5.56275
GTF3C3	12.8204	10.4827	10.3365	14.2955	14.6414	3.29982	3.22492	2.34545	2.52046	3.44357	7.01894	6.77167	6.96186	5.182	4.56127	9.80031	12.8181	11.2506	12.3939	10.7345
HECW2	4.95465	6.28287	5.81765	6.21581	6.37379	0.178105	0.242683	0.11386	0.909703	0.135289	0.386162	0.4075	0.313187	0.224924	0.34203	0.735021	0.728753	0.696267	0.713814	0.612896
KLF7	0.37384	0.37564	0.465781	0.770202	0	0	0	0.273549	0.312331	0	0.61851	0	0.37645	0.135188	0.548095	0.588819	1.60664	0.836496	1.14296	1.47345
UBE2F	63.6038	55.6668	51.7744	62.1746	57.458	14.4657	18.8427	18.9774	27.0395	19.0399	21.0609	17.9806	23.4874	21.1732	16.7484	22.3017	21.0197	18.2802	24.9119	19.5956
ERBB4	0.078493	0.15765	0	0.0966548	0.500608	0.268315	0	0	0.0980019	0.10202	0	0	0.0787333	0.169638	0	0	0	0	0	0
ERBB4	6.40204	7.32582	6.09929	6.1396	6.6448	0.67848	1.12665	0.976755	1.3008	0.677066	0.184041	0.0832319	0.298579	0.482483	0.407581	0	0	0.0829612	0	0
LANCL1	7.0824	6.04853	8.526	8.45839	7.55073	10.1025	9.63402	10.3596	13.3064	10.1577	9.07665	7.81237	10.8106	8.06303	8.95102	7.24703	6.08393	3.69584	5.81659	5.1148
MYL1	3.0156	1.37995	2.41724	1.71596	4.25888	8.18166	4.82069	4.86983	3.47767	9.04889	6.5379	6.53533	4.19405	11.4481	9.46252	7.86709	8.79535	8.68906	11.4384	7.66124
PCNP	39.0005	29.6708	37.8861	32.9517	38.5652	58.0635	54.2146	61.0093	59.0737	58.4279	59.1727	55.814	51.038	55.3109	64.0903	77.815	78.0298	72.6821	78.7686	77.372
MX1	0.286735	0.0960033	0.118834	0	0.122072	5.55777	3.45195	2.19816	3.82394	2.98549	5.68019	3.96027	4.12841	6.20591	6.29066	4.73099	5.47485	4.16095	4.3741	7.26512
MX1	0.163709	0	0	0.203035	0	0	0.191179	0	0.205811	0	0	0	0	0	0.1806	0.193999	0	0	0.564671	0
EFNB2	0.742595	0.933437	0.232337	0.461342	1.19364	53.5219	57.062	40.7388	54.2439	53.0547	102.297	118.897	114.254	120.667	102.179	105.346	101.31	80.7643	91.0736	95.1299
ARGLU1	115.96	129.585	112.352	131.426	121.113	106.717	110.745	110.709	119.839	109.096	147.787	156.16	147.111	156.532	152.68	143.628	144.494	164.687	123.91	158.04
EN1	0	0.233486	0	0	0	2.1275	1.90142	0.770388	0.58671	1.83202	1.4516	0.787717	0.707452	2.2867	1.2873	0	0.274667	0	0.268123	0
RADIL	0	0	0	0.221023	0	0	0	0	0.112048	0	0.110962	0	0	0	0	0	0	0	0	0
IFI44L	0	0	0	0	0	2.26773	1.92971	1.46541	2.09353	3.05035	0	0.374579	1.01013	3.26534	0.367552	2.36792	3.5318	1.8678	3.05886	1.75738
IFI44L	0.76497	1.34628	1.67605	0.950934	1.23012	0	0	0.210976	0	0	0.238517	0	0.193672	0.208661	0	0	0	0	0	0
CASKIN1	0.15944	0.0533543	0.0658754	0.195916	0	0.121001	0.49462	0.464141	0.529765	0.0689373	0.0655902	0.0593265	0	0.171918	0.0580946	0.0624224	0	0.177393	0.121242	0
SLC5A10	0.195966	0.985443	0.490868	0.974811	0	0.897117	0.687318	0.648796	0.988045	1.54265	0.977988	0.442266	0.595606	0.855609	0.216769	0.232832	0.693572	0.22047	0.451676	0.51807
FAM83G	2.61449	2.77376	2.89989	2.69792	2.79311	14.6008	18.9855	12.295	14.2218	14.9937	11.9142	13.5516	18.7545	16.1011	15.039	23.0303	18.5917	21.8105	13.8425	14.3373
GRAP	0	0	0	0	0	0.130704	0	0	0	0	0	0	0	0	0	0	0	0	0	0
CACNA1H	0.0559402	0.224643	0	0	0.0712335	0	0.0650835	0.06108	0.0697169	0	0.0690523	0	0	0	0	0	0	0	0	0.0730665
SYNGR3	0	0.0955841	0	0	0	0	0.332597	0.208429	0.118973	0.123849	0	0.106564	0	0	0	0.112147	0	0	0	0.24942
MYO15A	0.0500888	0	0	0	0.0637544	0	0.0582639	0	0.12479	0	0.123604	0.0559001	0.25061	0.161984	0	0	0.116627	0	0.0571203	0.0653912
ALKBH5	71.0754	91.7153	79.7873	93.6988	88.0897	17.8633	17.4163	13.8539	19.7085	10.8783	19.2087	16.571	16.5633	15.2596	18.6075	39.6871	28.5195	34.3777	38.2087	32.2601
MIEF2	91.3463	93.6212	81.5822	100.684	101.291	19.2083	18.9147	18.7365	20.6286	18.9285	14.9789	18.8851	18.0489	21.5611	20.1111	22.4697	26.0098	17.4613	17.0554	19.7035
ATP5MF-PTCD1	75.0772	78.0417	74.0269	64.5625	75.4424	17.7092	14.7349	13.009	12.0453	13.1651	16.6946	19.5935	19.6828	17.7293	16.383	26.6819	29.4891	21.1461	24.4196	28.6272
SLC29A4	0	0	0	0	0	0	0	0	0	0	0	0	0	0	0	0	0	0	0	0
FBXL18	72.2972	70.9546	58.5959	74.9601	73.9808	10.1803	9.57551	10.4177	14.7364	10.9041	12.1292	10.3344	7.98972	11.5282	7.63375	10.5436	9.6329	8.08332	10.7189	9.49345
ACTG1	487.595	459.649	485.782	497.622	421.684	1595.55	1629.24	1509.49	1579.17	1631.68	1594.88	1417.9	1736.8	1775.17	1690.28	1881.77	1742.45	1488.99	1828	1755.28
FSCN1	0.28911	0.290398	0.119825	0.118846	0	0.109882	0.112278	0.211095	0	0.125434	0.119325	0	0	0.104296	0	0	0	0	0	0.126307
ABCG2	0	0.127122	0	0	0.161954	0	0	0	0	0	0.157004	0	0	0.137268	0	0.149468	0	0	0	0
C16orf72	143.158	144.117	143.004	135.856	143.096	98.0285	97.4762	86.7093	93.0586	98.4753	89.2756	93.8071	99.1278	98.76	109.787	132.097	133.413	135.35	122.896	133.274
TLR2	0.25922	0.130243	0.161545	0.320569	0	0	0.755898	0.569251	0.324986	0.338294	0.965335	0.436558	0.261141	0.562675	0.712887	0.459507	0.911904	0.870377	0.297305	0.681416
PRKCB	24.6097	28.1548	25.3442	24.6926	28.3752	18.0757	13.7804	18.8504	25.644	19.8618	12.9982	12.44	17.5392	17.0456	15.804	1.8705	2.71244	0.953907	1.95511	2.72037
CACNG3	0	1.24788	0	2.08991	0	0	0	0.46285	0	0	1.04657	0.47323	0.425721	0.458762	0.46465	0	0	0.944056	0	0.55551
RTL9	0.0802801	0	0.0997027	0	0.102415	0	0.0934804	0	0	0	0	0	0	0	0.0879513	0	0	0	0	0
NDUFAB1	114.468	115.51	122.109	114.019	111.682	165.797	167.609	159.477	161.069	154.668	134.056	133.935	129.119	127.85	139.874	152.367	145.609	101.394	170.133	136.157
PALB2	28.0528	25.8172	27.1689	25.883	27.1104	4.62992	5.18606	6.58081	5.36582	3.85929	2.80199	2.88395	3.37028	3.96852	3.50933	7.3571	7.2051	5.57497	5.53603	6.2377
PLK1	697.787	732.972	711.836	669.13	711.313	257.447	248.452	257.868	279.667	271.46	367.541	335.299	394.503	410.831	375.285	337.834	328.098	295.614	310.565	332.804
ERN1	2.39432	2.00509	1.82416	1.15182	3.74812	0.759382	0.310346	1.16874	0.667246	0.520924	0.495487	0.149384	0.134042	0.433228	0.58547	0.628958	1.0922	0.446749	1.06819	1.74884
CHTF18	59.2561	53.3721	47.8902	56.0499	56.6551	35.0768	37.0123	41.8834	42.2223	35.875	38.5357	40.3746	37.0397	39.0141	32.639	22.9119	26.9934	27.2034	20.9903	28.588
PDILT	9.53689	8.90992	7.41091	7.9275	7.02981	0.780539	0.797266	2.0095	1.43471	1.49331	1.70387	0.513677	3.92117	2.73369	2.26645	3.78654	2.14919	1.79259	2.09818	1.8057
UBN1	19.0113	25.9728	26.1884	25.1877	22.1095	0.928661	1.32823	1.78863	2.65536	1.91354	0.404422	0.365782	0.984908	0.707408	0.896184	0.962677	0.955556	0.182329	1.12083	0.21417
UNCX	7.4088	9.66698	7.77671	7.72224	6.95985	6.18853	7.72644	5.30524	3.53476	4.99326	1.49945	3.16437	1.82643	1.74916	3.32359	3.80783	5.43541	6.53516	6.00163	6.61946
MICALL2	266.424	259.691	228.315	253.067	254.846	5.97734	4.84413	5.83923	12.6541	4.46933	4.13986	2.93484	3.90325	5.18289	4.85722	2.87554	4.11975	4.94291	3.72222	5.3293
MGAM2	90.3722	95.2614	83.0058	98.4373	94.9057	71.91	76.1851	77.0399	77.5679	75.203	45.6303	54.5832	52.4807	56.5369	51.8185	30.2164	33.897	22.3631	24.891	29.7778
ELFN1	0.0846608	0	0.210353	0	0	0	0	0	0	0	0	0	0	0	0.0927842	0	0.098871	0	0	0
UGT2B10	0	0	0	0	0	0	0	0	0.265158	0	0	0	0	0	0	0	0	0	0	0
UGT2B10	0.849925	0.284734	0	1.05214	1.08929	0.16179	0.165297	0.31136	0.177766	0	0.880007	0.159187	0.428548	0.461697	0.779913	0	0.665157	0.158692	0.975642	1.86375
UGT2B10	0	0	0	0.131793	0	0	0	0.117036	0.133618	0	0	0	0	0.115659	0.117235	0	0	0.119293	0.244523	0
UGT2B10	0	0.397378	0.164316	0.652152	0.506429	0	0	0	0	0	0.16365	0.148017	0	0.143086	0	0	0	0	0.151202	0
UGT2B10	0	0.331025	0	0.2042	0.211369	0	0.384535	0.181255	0.827967	0.64638	0.40983	0	0.499048	0.716881	0.181636	0.585335	0.387346	0.554304	0.567905	0.651114
MAD1L1	99.0067	118.903	101.759	108.987	121.58	94.0415	104.027	103.87	106.357	93.7972	62.7648	64.3915	63.1884	69.3003	59.7205	17.3777	14.788	16.3625	15.274	19.5523
PMM2	9.04252	7.39726	10.3287	6.37204	8.41936	11.0317	7.9527	6.90648	6.45682	10.4536	13.1319	7.0617	11.5365	10.2551	13.5388	17.9199	24.8666	20.1652	20.6457	24.4606
C7orf26	56.5327	63.307	56.982	60.3109	60.4782	27.1187	30.1965	26.4031	28.8129	28.0283	26.3852	35.916	33.9824	39.4117	34.739	46.9568	36.0471	40.6162	39.1393	37.8428
RGS11	1.45335	3.96799	1.56152	1.55071	2.9417	0.95089	1.21415	0.458665	1.30975	1.36328	0.25927	0.70348	1.05276	0.453704	0.229885	0.246913	0	0.233795	0.239472	0.549432
PGAP6	9.85008	10.3302	11.2202	12.1947	9.14872	1.14137	1.66588	1.41213	1.9708	1.67847	0.886919	0.64175	0.863837	0	0.786045	0.506646	1.67598	1.27951	0.819417	1.69057
PDIA2	0	0.208221	0	0	0	0	0	0	0	0	0	0	0	0	0	0	0	0	0	0
RNF175	28.2295	29.4163	32.3539	27.4641	30.0217	3.7244	3.21874	5.2599	3.79532	4.93783	0.938934	1.13225	0.762783	1.09582	0	0.298116	0.592365	1.12898	0.289027	0.331751
FGB	0.166203	1.00255	0.623119	0.412343	0.213407	0.190003	0	0	0.208989	0	0.206891	0	0	0.361902	0	0	0	0	0	0
FGA	0.117011	0.117563	0.291416	0.289102	0.44906	0.267041	0	0.256712	0	0	0	0.131249	0.117752	0	0	0.13814	0.137053	0	0	0.15363
LRAT	2.91127	6.71118	5.29382	3.16195	5.44302	54.7147	44.5874	53.686	38.4322	51.104	38.001	45.8212	43.7988	34.2419	53.4275	119.235	136.699	121.404	130.043	138.397
PLAAT2	0.364254	0	0.461878	0	0.474824	1.67814	1.28507	0.407231	1.39653	3.3912	1.3812	1.24911	1.87201	2.42065	2.04335	2.63257	4.80095	3.32216	4.24959	4.39679
RBM46	9.58957	14.4611	8.67766	13.5354	9.34039	2.07908	3.28256	3.27666	2.07886	2.3803	0.205799	0.186136	0.501205	0.179995	0.182421	0.195955	0	0.185566	0	0.435952
NPY2R	0	0	0	0	0	0	0	0	0	0	0	0	0	0	0	0	0	0	0	0
EIF3F	49.9129	62.8519	61.3834	56.3058	63.1244	239.171	204.837	224.075	220.111	244.356	329.094	338.162	304.394	318.468	303.657	421.268	413.225	332.975	415.44	390.125
PIP4P1	8.65289	8.70735	6.04021	9.90108	8.37986	0.275545	0.281439	0	1.52032	0	0.300906	0.816439	0.977736	0.790093	0.533726	4.01248	2.84718	4.07032	1.38945	0.956783
FRMD7	0.297556	1.04678	1.48555	0.737141	0.763126	0	0.173653	0	0.186814	0	0	0.167283	0.450373	0.161738	0	0	0	0.166765	0	0
CNPY3	77.7113	101.604	66.3257	78.0758	85.5741	41.8644	46.0292	42.4863	42.652	38.883	40.7551	31.5942	36.4146	35.6677	33.5607	17.4676	22.0332	20.7387	23.1211	23.139
TRPC5	1.32889	2.4914	2.53213	1.9653	2.71416	0.100985	0.103189	0.484862	0.110702	0	0.10963	0.198318	0.0889396	0.19163	0.19425	0.104351	0	0	0.101309	0
CD200	7.56726	6.36029	3.74709	1.59873	8.80629	1.94096	2.97216	0.944121	4.31814	3.37024	4.80329	5.79175	4.77647	2.80757	5.21316	1.01749	2.53186	1.92571	1.47748	0
CD200	1.92233	2.79322	2.14283	1.86213	2.75243	0.489228	0.999462	0.472071	0	0.841895	1.06739	0.241347	0.650153	0.466992	1.6563	0	0.757176	0	0	0
MPC2	2.33859	9.44051	2.98822	2.97656	3.07291	0.540821	1.10405	1.05426	1.20576	1.88206	0.595965	1.61683	2.91054	2.61382	1.58819	3.40932	3.39518	1.61291	2.74919	3.16498
ATP1B1	0.164636	0	0.205724	0	0	0.7528	0.76907	1.45004	1.03496	0.64638	2.45898	2.0387	1.33079	3.04674	1.63473	0.975559	1.74306	0.554304	1.51441	0.868152
CNGA3	0	0	0	0	0	0.399732	0.204179	0.385131	0.439839	0.228914	0.217703	0.196901	0	0.380846	0.771939	0	0.41158	0.196302	0	0
CFAP221	0	0	0	0.324712	0.168104	0.149868	0	0	0	0	0	0.147398	0	0.142487	0	0	0.15395	0.146936	0.150571	0
IFNGR1	0	0.271806	0.337245	0	0.173236	0.617677	1.26216	0.445653	0.508862	0.35313	0.503826	0.151898	0.954104	0.293686	1.19067	0.799436	1.42794	0.757115	2.32747	1.60047
DMD	1.91389	2.401	1.81322	2.2005	2.28035	3.16318	3.58039	3.03068	3.31004	3.56206	7.69983	7.99763	6.66181	7.11206	8.84165	15.1453	14.978	14.3476	15.324	14.5373
KNL1	14.8579	16.221	11.6709	14.9232	15.6256	18.4728	25.5223	18.7152	22.9809	22.2387	40.7933	39.5796	44.7238	42.5078	37.9802	42.1813	43.0372	41.6177	34.1455	45.458
KNSTRN	31.4603	22.2315	19.2545	21.8918	29.2197	19.1568	19.5597	19.8056	18.0193	22.1187	32.4448	23.5562	30.8429	21.6229	20.2808	16.9839	16.0276	21.433	15.1846	20.8498
CHST12	0.474714	0	0	0	0	0	0	0	0	0	0	0	0	0	0	0	0	0	0	0
GNA12	0	0	0	0	0.38821	0.687748	0.70234	0.332931	0.760909	0	0.376397	0.340412	0.611829	0.659246	0.333952	0.717205	1.78232	2.03679	1.7376	0.798311
BRAT1	19.9247	22.2972	24.15	22.2155	26.0788	2.9051	2.4734	5.12483	5.85187	2.03047	1.75569	1.27037	1.56748	1.22817	1.0892	2.00584	1.32704	1.58302	2.1087	1.85917
EIF3B	0.188863	0	0	0.469456	0	0.216092	0	0	0.47584	0.247648	0	0	0	0	0	0	0	0.21236	0	0
CHST12	0	0	0	0	0	0	0	0	0	0	0	0.381202	0	0	0	0	0	0	0	0
TTYH3	1.07197	1.24613	0.83938	1.52561	0.862155	1.41314	1.83798	0.862476	1.40634	1.31762	0.626817	1.63788	1.58163	1.58214	0.925329	2.98276	3.94327	3.70449	3.0897	3.1689
SNX8	0.672174	1.18262	0.420068	0.625459	0.6474	0.960601	0.392541	1.29538	0.422669	0.21998	1.04606	0.189222	0.339684	0.365967	0	0.597616	0.197743	0.377286	0.773071	0.221595
GRK4	0	0.184276	0.113712	0.169078	0.0583969	3.1338	2.40196	2.25328	2.57177	3.15326	7.64212	5.83709	6.01398	7.31937	8.57338	14.8688	15.1684	17.1471	15.2254	18.7467
SLC24A2	0.0628605	0.0631137	0.155941	0.0773041	0.160175	0.35792	0.0731524	0.137344	0.0783852	0.0816001	0.0776354	0	0.12594	0.33918	0.137536	0.221667	0.439601	0.279965	0.143501	0.0821536
SARAF	83.6917	73.1753	78.3341	79.4401	70.8932	4.51728	3.58882	4.3598	6.91691	3.16778	5.20278	3.96257	3.78078	5.51121	6.55599	8.08456	8.28854	9.13639	8.85178	8.70522
PLA2G12A	7.75554	8.78012	7.00514	9.07751	5.32097	8.6137	13.055	9.12623	11.6526	6.70254	12.4419	13.7228	20.7071	13.8114	15.8788	21.6781	19.8129	18.6088	15.1333	22.8365
XPA	4.52149	6.11976	4.34902	4.74899	5.36219	2.78409	2.84419	2.8739	3.71974	1.36655	4.76528	2.5468	2.28608	5.49434	3.45617	3.71249	2.25223	2.14842	3.00138	3.44156
MTTP	0	0	0	0.09213	0.190875	93.8777	118.411	103.849	119.198	105.608	127.673	128.282	141.089	164.121	156.945	155.86	160.592	170.153	120.64	165.665
SPINK4	0	0	0	0	0	5.99418	6.08131	6.37714	0	3.82983	3.60603	3.25722	0	3.23617	0	6.94843	3.54972	19.5935	6.58768	3.91467
B4GALT1	0.569052	0.38151	0	0.943059	0.24399	17.5801	25.0535	20.7139	15.772	21.8892	27.2026	20.5384	22.4719	27.9359	25.1651	24.1021	27.0617	27.302	24.9088	26.5632
TDRD7	121.329	127.734	123.492	126.48	127.092	18.6121	17.1813	22.2428	24.5808	18.467	10.6785	8.8277	13.2281	10.4371	9.46071	6.12054	8.8895	6.41833	6.57854	7.29222
TMOD1	0.915911	0.735949	0.683061	0.903257	0.467776	0.522071	0.320079	0.100277	0.114476	0.357504	0.113366	0.102538	0.27592	0.396333	0	0.323726	0	0.408834	0.209521	0.479978
GNE	18.1395	23.0762	21.6794	24.4801	21.8286	13.5865	11.9717	13.0456	17.0507	13.9301	10.3666	9.66646	10.9243	9.80728	11.6457	8.74834	10.7955	6.74468	8.49348	11.6509
NANS	149.972	163.059	135.145	140.76	141.488	73.0121	67.5426	82.6882	71.6781	88.5423	65.9041	60.8995	61.4153	52.3748	62.9149	47.4295	49.1744	36.5015	51.2607	49.3716
CLTA	91.7434	101.946	87.6795	92.0494	94.2874	69.8939	62.2983	61.9704	61.9456	61.0115	51.4289	42.8292	52.3016	54.3112	50.0561	63.3796	63.4567	63.1707	57.7316	60.2223
SCLT1	36.6954	37.247	36.8855	45.6676	40.7594	23.5688	20.7445	19.387	28.5269	22.5553	25.3133	27.921	28.9345	28.6082	25.0302	27.3308	31.0544	32.2863	30.8044	32.0307
C4orf33	142.805	131.662	147.87	112.84	121.51	64.2158	66.9259	59.2736	63.7247	68.9767	28.8224	23.1344	29.8638	25.5531	23.3325	19.9072	17.739	11.3723	15.3022	19.483
PCDH10	0	0	0	0.215102	0	0	0	0.190919	0	0	1.29505	0.78087	0	0.566375	0.76533	1.84971	0.612077	0.973113	1.79449	0.228628
PCDH18	0.723853	0.969241	0.799101	0.792429	0.513023	2.7495	1.96672	2.81539	3.51517	3.34563	2.88448	2.69895	2.582	2.5208	3.17212	8.04712	9.2014	6.72552	7.81308	7.89524
NOCT	41.5777	41.5882	42.1808	47.4375	42.6779	1.49061	0.913444	1.72913	3.62187	1.3708	5.21297	3.83068	4.23535	3.42258	3.46787	3.41389	4.6256	4.70116	4.2121	3.10847
ELF2	36.3525	38.9972	33.76	41.4301	37.4225	93.085	95.3623	93.2123	91.2544	90.9419	81.8582	92.1883	91.6507	97.8078	98.3163	76.0253	70.0236	81.7108	67.5351	85.531
HPF1	262.473	248.641	237.562	234.893	249.352	82.0553	84.0574	90.6142	89.6319	95.7011	79.3109	80.9281	81.9523	89.4083	78.8846	78.4345	75.7242	78.8528	76.0733	78.646
PPP2R2C	3.38242	3.92186	2.59444	4.18309	3.33172	0.594083	1.06222	2.28558	1.30484	1.35827	0.807474	0.584269	0.524249	0.705994	0.715573	0.768729	0.610229	0.436827	0.895269	0.512988
WFS1	0.521125	0.837598	1.16699	0.257234	0.93241	0	0	0	0.1304	0.135743	0	0	0	0	0	0	0	0	0	0
CRMP1	0	0	0.095168	0	0	0	0.0892409	0.251469	0.382741	0.498042	0.189528	0	0.153743	0.0828131	0.0839479	0	0.178899	0	0.262727	0.200582
DRD5	0	0	0	0	0	0	0	0	0	0	0	0	0	0	0	0	0	0	0	0
OCIAD1	1.40285	2.1205	2.22132	3.97728	0.456699	2.82614	0.824478	0.783363	0.895409	0.465934	0.442821	0	0.720124	0.775971	0.393028	0	0	0	0.408756	0
CHIC2	89.1483	85.2499	94.6908	84.103	88.3136	29.6766	26.5838	28.1797	24.1399	28.7909	31.1117	31.065	32.9441	26.3485	26.922	33.4201	35.5393	36.5829	31.0359	38.2367
SLC34A2	0	0	0	0	0	0	0	0	0	0	0	0	0	0	0	0	0	0	0	0
RBPJ	100.162	97.9711	90.3789	106.519	105.433	36.2481	36.3887	37.4647	41.5409	34.8686	26.0711	26.4016	26.6978	27.3988	25.8566	23.9894	23.5439	23.4262	21.2125	26.2153
STIM2	0.417732	0.83905	0.207568	0.411683	0.319823	15.1391	12.7456	11.1525	12.6268	14.0135	19.2223	20.0037	18.2767	22.6699	18.8602	15.3453	12.3901	15.9326	13.3705	13.7819
ITLN2	0.325531	0.327935	0.823197	0.409306	0.423088	0.374388	0.382302	0.362849	0	0	0	0.370999	0.333482	0	0	0	0.777306	0.369987	0	0
HGSNAT	35.2429	32.2025	35.1049	30.1446	31.1964	16.0432	14.8385	17.7651	12.4127	17.6411	13.9408	9.83047	13.238	16.5364	10.2644	19.8004	17.6489	12.9968	13.0955	19.7752
PI4K2B	217.516	223.702	213.831	210.283	224.728	25.6469	26.5682	33.4996	43.9735	27.5048	11.5179	13.7723	12.519	17.7557	14.8808	32.5279	30.256	21.4749	27.4133	30.5996
DLC1	1.60728	0.749191	0.854072	1.27008	1.02346	7.45054	8.0814	7.14597	6.58243	9.38486	10.7007	13.7811	10.5181	12.012	10.7335	20.3007	20.5299	20.0606	19.5176	19.6464
TUSC3	3.94504	2.89153	4.54572	1.80886	4.67305	0	0.421673	0.400781	0.458123	0.476773	0	0	0	0.397029	0.402181	0	0.4295	0.817377	0	0.961538
FGF20	2.20857	2.22608	1.86752	2.32256	2.39986	0	0	0	0	0.489719	0	0	0	0.815665	1.23934	0.443528	0	0	0	0
MICU3	0	0.0945263	0	0	0	0.107295	0	0	0	0	0	0	0	0	0	0	0	0	0	0
VPS37A	20.9267	27.8131	27.3208	26.4457	30.1774	14.3625	8.50563	10.0303	12.1428	9.53916	11.7932	10.2561	13.2579	11.7049	12.6663	14.9012	15.866	17.3826	14.8743	17.2978
MTMR7	23.9259	26.7335	20.8915	21.7764	24.71	2.57185	5.41944	4.17596	6.53443	5.33124	0.87427	0.948896	0.709585	1.22315	1.23972	0.665887	0.165203	0.157657	0.161547	0
MTUS1	51.1021	49.3931	43.7396	51.7026	48.4349	58.566	38.9627	60.2975	33.9929	35.8314	23.0527	25.4557	20.7717	22.7489	25.8154	10.2321	10.552	13.0063	8.2328	13.6251
PCM1	112.096	118.193	85.7592	104.336	107.532	11.3098	9.81556	13.4056	16.7313	10.1657	8.74815	10.0302	9.0434	8.18126	8.83957	16.4752	15.8693	13.4961	13.0962	15.1228
ASAH1	5.07802	3.33923	3.91357	3.64307	0.753998	4.2469	5.02329	2.80187	4.43104	5.63711	3.89862	7.05215	3.36358	4.26344	5.61676	6.7291	8.98563	7.03098	8.10249	8.51898
FRG1	60.8251	65.4799	60.492	47.3342	57.9796	83.4748	98.1054	85.0796	99.4094	81.1318	86.5056	96.596	83.7225	86.9268	91.1265	96.3785	75.6565	80.8274	87.384	81.7631
FAT1	0	0.043069	0.0265381	0.0525984	0.109022	1.73237	1.89522	1.49568	1.73357	1.72145	3.30253	3.39345	4.24153	4.31531	3.76675	13.9029	13.9046	13.6473	11.6492	14.1415
CASP3	115.69	101.514	101.765	108.73	117.002	40.3584	41.8102	40.1589	51.2556	40.6588	27.8214	32.3533	27.6634	29.8028	34.4069	28.232	38.9854	30.7353	24.4349	31.2367
ACSL6	0.4504	0.376904	0.279578	0.369636	0	2.2236	1.66048	2.05207	1.87396	3.12127	1.48474	1.17507	1.73132	1.86513	1.80849	3.17963	3.76639	3.34644	2.83002	3.33906
HELT	0	0	0	0	0	0	0	0	0	0	0	0	0	0	0	0	0	0.505328	0	0
SPATA21	0	0	0.354114	0.35196	0.363952	0	0	0	0	0	0	0	0.286749	0	0	0.336162	0	0	0	0
SLC25A4	0.895388	1.08039	1.12003	0	0.920649	0.409641	0.418477	0.789488	0	0.703896	0	0.201816	0	0.585552	0.197808	0	0.42188	0.201203	0.206123	0.472737
CFAP97	94.984	93.6432	78.7846	91.6427	88.3762	3.40917	2.17665	5.54532	10.3211	5.37154	4.41166	3.7801	3.39351	5.48421	3.70523	5.74874	6.58573	5.44365	4.71859	6.64139
ANKRD37	12.9381	14.5773	14.4931	15.3831	9.93334	8.33258	4.92532	12.3531	12.6612	12.6695	19.2635	15.2434	15.2758	21.1037	14.1083	19.7364	19.1792	11.2942	17.7793	17.3771
UFSP2	27.3211	32.7007	29.8725	29.6606	24.7538	9.24716	4.94804	10.1892	13.0922	9.58969	6.95955	6.51156	5.84595	5.03874	6.8084	4.57062	4.99206	4.76078	6.87187	4.32218
PDLIM3	0	0	0.652975	0	0.335537	0	0	0	0	0	0	0	0	0	0	0	0	0	0	0
SORBS2	8.73026	8.99354	8.59603	7.59727	11.709	0.943196	1.75241	0.905259	1.87884	1.4669	1.02342	0.75737	1.13206	1.13825	0.824181	1.23974	1.05382	0.503272	1.3757	0.984634
TLR3	0.348812	0	0.144778	0.143627	0	2.78611	2.84671	1.65798	3.64031	1.51577	2.73949	2.3474	3.51	3.40327	4.47166	3.01966	4.22148	3.11995	3.33063	2.74766
CYP4V2	0.421541	0.141219	0	0.521783	0.360143	0	0	0.617653	0.352638	0.183537	0	0	0	0.30529	0	0	0.164934	0.1574	0.322569	0
MTNR1A	8.29287	5.80083	3.15741	5.82136	5.32976	0.206205	0.631955	0.198715	0.453898	0.23623	0	0	0	0	0	0	0	0	0	0
KLF3	7.56406	6.3929	6.53569	8.75636	6.94926	14.7226	15.6887	15.9577	15.2195	17.1635	9.24864	9.39802	11.394	10.4785	9.50897	12.9334	16.1703	21.1033	11.5009	13.536
KLHL5	1.06412	2.90325	1.70804	2.07184	1.1699	0.521081	0.177454	1.17041	0.572795	1.98745	1.32319	1.19677	0.613741	0.991831	1.00523	0.359949	0.714494	1.02263	0.523901	0.400375
FAM114A1	45.5684	42.9896	41.6755	42.5957	50.6624	14.9103	17.5463	16.7233	19.098	17.0703	4.72659	4.83259	4.50436	6.11103	5.2826	2.1524	2.71923	2.40889	2.46799	1.30598
TBC1D1	50.7243	54.0854	45.7449	52.9162	52.2955	9.7977	9.45597	11.7141	12.7751	10.9938	5.90453	5.56952	5.6104	6.85477	6.87413	4.65635	5.65233	4.79088	4.91116	5.53435
PGM2	0.319446	0.534852	0	0.52571	0.272219	0	0.124103	0.116713	0	0	0	0.119343	0.107061	0.230678	0	0.376809	0.498406	0.356889	0.487692	0.698401
SLC25A52	17.5074	22.0364	16.193	24.5105	19.6694	1.34062	1.02682	0.973184	1.11206	0.385803	0	0.331685	0	0	0.650743	0.349396	0.694569	0.661513	0	0
RNF38	69.6508	68.0184	64.7888	71.409	67.7341	14.0504	11.3011	14.6644	15.1024	11.2779	11.3774	13.3777	12.1355	13.7846	12.5312	14.2358	17.3502	25.3526	9.76117	18.7587
EXOSC9	140.444	147.508	116.747	127.616	119.642	63.8535	59.0038	63.2082	60.1261	69.9215	53.1796	57.7154	52.6602	50.6293	43.3386	61.4225	60.7193	48.5583	52.7897	54.9678
PTPRD	1.20969	1.21435	1.01925	1.18868	1.04689	1.32175	0.900511	0.89766	1.08482	0.752888	0.596954	1.0799	0.580954	0.365074	0.687334	0.681734	0.337947	0.59198	0.331043	0.378969
TYRP1	0.385654	0	0	0	0	0.22066	0.225411	0	0	0.252926	0	0.217539	0.195303	0.631257	0.639721	0	0.454844	0.433769	0	0
RBM47	0.0986628	0.247608	0.183388	0.060598	0	23.3019	26.5676	19.8659	25.5623	25.7155	28.2409	29.2875	32.5288	34.0319	33.7459	30.8732	39.5104	41.2622	27.7893	36.0631
LAP3	52.8601	53.6988	52.9957	52.3881	56.3142	32.0952	41.0371	41.5066	41.4786	42.2259	26.6208	24.6893	23.6286	22.1024	19.9994	10.5263	12.7965	6.71303	10.4198	10.2763
CLOCK	50.4306	51.7518	50.2721	62.4507	48.9842	6.10096	7.27297	4.66704	8.42577	5.67538	7.23946	8.43467	6.57057	8.79457	6.63158	13.0815	13.3238	13.4965	8.27708	11.0403
KIT	0	0	0	0	0	0	0	0	0	0	0	0	0	0.121985	0.123645	0.398509	0	0	0	0.147728
CLRN2	0	0	0	0	0	1.01911	1.0403	0.99225	0	0.59039	1.68272	1.01449	0.456446	1.47565	0	1.60419	2.12943	1.01198	3.10533	1.78683
SMC2	168.357	200.883	149.945	189.809	182.811	143.862	160.982	161.32	170.76	158.169	165.95	187.53	172.213	181.844	163.623	156.855	151.991	174.678	120.37	158.814
EXOC1L	0	0	0	0	0	0	0	0	0	0	0	0	0	0.53623	0	0	0	0	0	0
ECPAS	54.7958	59.0631	49.5075	55.5618	60.9246	4.47316	3.81983	5.05363	10.1949	3.35152	2.85662	3.30489	3.50217	3.42452	3.00091	6.63859	6.33135	5.39018	5.58737	6.11554
FBXO10	20.4473	22.8224	20.1694	21.4078	22.5669	2.59113	1.68483	2.60275	4.39259	1.61385	1.15141	1.85143	1.45323	1.34194	1.36023	2.67919	1.69129	1.96086	1.18217	1.76057
POLR1E	42.5044	50.5771	43.998	35.2495	43.4118	31.5209	23.0993	26.6541	24.6571	29.8552	43.8307	54.0575	45.9059	54.2527	49.68	81.583	73.7105	67.5942	73.3792	73.0877
TMEM192	113.26	123.484	119.994	120.974	133.385	32.252	26.2985	37.9544	42.1627	31.435	8.58185	10.9733	11.2979	11.6548	9.4478	2.53671	3.07988	1.86803	4.37272	2.82274
MARCHF1	0	0	0	0.259393	0.2684	0	0	0	0	0	0	0	0.21132	0	0	0	0	0	0	0
TMA16	57.1887	50.0072	48.1043	57.4322	56.7727	49.7402	48.3846	50.0207	52.765	46.7529	49.8593	47.2427	51.343	52.6729	41.7105	52.4083	50.3943	46.7094	47.8531	52.3559
FNIP2	53.3346	55.0912	46.1304	54.2932	54.657	19.2724	18.4304	20.468	19.8146	19.0392	12.7436	11.3745	13.0644	17.1537	10.2534	42.4635	38.1771	45.5071	22.3088	33.2023
UBA6	16.9688	17.5213	15.9415	17.1588	16.9876	2.03451	1.67923	2.17744	5.14239	1.33832	0.848845	1.61233	0.96394	1.26096	1.27826	2.5045	3.36482	2.14276	2.1181	2.7847
APBB2	0	0	0.117314	0	0.12051	0.215173	0.219867	0.41334	0.117968	0	0	0.105665	0.0947799	0.408429	0.414007	0.222401	0.5515	0.631953	0.215907	0.247313
METTL14	201.099	217.227	198.022	200.327	197.123	68.6573	71.4424	74.9656	88.4707	74.6713	86.7165	87.3124	87.2997	85.7094	94.8151	84.9951	76.1914	78.1982	88.1238	97.5472
PRSS12	0	0.169296	0.0696882	0.0690877	0	0	0.0653985	0.184129	0.0700552	0.072929	0	0.0627609	0.112553	0.12125	0	0	0.130953	0.0625545	0.0641294	0.0734211
NDST4	2.37752	3.00694	2.18844	2.27887	2.13561	0.802969	0.820502	0.481907	0.770187	1.37444	0.435847	0.394218	0.972369	1.61892	0.579196	2.28172	1.54302	2.25945	2.21522	2.19125
UGT8	1.49433	0.954831	0.674256	0.919233	0.432858	0.851017	1.66024	0.668093	1.10154	0.441045	0.587451	0.607254	1.70178	1.24665	1.26376	3.03519	3.24741	4.61519	2.40432	3.55238
SPOCK3	0.401809	0.807585	0.834947	0.165695	0.514672	0.305861	0.468748	0	0.335952	0.174853	0.332629	0.451279	0.539913	0.290836	0	0	0.314238	0.149955	0	0.176105
TLL1	0.468116	0.156698	0.484396	0	0.0995138	5.60052	6.63138	5.46116	5.64959	3.54901	6.55984	6.1951	6.49517	8.43036	6.66577	13.8647	9.01495	11.0454	7.04287	11.1285
CPE	0.280871	0.0563958	0	0.138086	0	0.127908	0.196069	0	0.0700099	0.0728818	0	0.188161	0	0.181758	0	0.0659943	0	0.062514	0.064088	0.146747
MSMO1	1.21264	1.70843	0.609573	0.908394	0.93966	0.278056	0.284002	0.268609	0.306865	0	0.303675	0	0	0.265793	0.538645	0	0.574695	0	0	0.321868
KLHL2	14.2289	16.3027	14.0234	14.4444	13.6778	2.43778	2.98875	4.22241	4.82145	4.08941	5.48077	5.75671	5.45291	5.25632	5.32747	9.59452	8.68632	7.97055	7.18711	8.98662
NPY1R	0	0.573211	0	0	0.368804	0	0.667637	0	0	0	0	0.970181	0.290581	0.313098	0	0	0	0	0	0
MED28	193.533	191.084	189.597	188.259	190.079	77.9936	71.9236	96.9806	106.119	86.7196	76.4547	57.8842	51.6167	52.5062	58.9637	63.2882	59.0851	45.9812	68.3507	56.024
TMEM144	14.815	14.0922	16.1174	19.552	15.1284	1.45653	1.11602	1.05186	3.60357	1.25034	0.198195	0.537776	0.804433	1.21334	0.351346	1.88709	2.43499	1.25095	1.28168	0.629731
GRIA2	0.102271	0.102734	0	0	0	0.349907	0	0.448243	0	0.133177	0.886814	1.03128	1.54185	1.66106	2.1327	0.241189	0.957021	0.913765	0.585327	0.536431
GLRB	0.154302	0	0.385332	0.191216	0	0.881595	0	0.509232	0.581511	0.403538	0.383803	0.694268	1.0904	0.335645	0.170089	0	0	0.173031	0	0
WDR19	8.17541	9.09556	7.6647	8.58778	7.36194	1.37	2.14658	1.40282	2.20188	0.833509	1.28856	2.42064	2.57305	1.47259	1.66837	3.49072	3.64908	2.77025	3.20601	2.83243
NCAPD3	28.9494	31.8598	29.5486	30.6689	29.1382	19.3405	18.7474	23.5972	22.7775	19.7938	21.2829	22.3551	26.7327	23.4849	22.677	31.0861	27.4041	21.8405	24.2002	29.2719
PRIMPOL	14.4846	21.0586	16.1383	15.144	21.0855	4.6577	4.59459	6.49064	4.05864	6.06164	4.71721	6.00478	4.96304	5.65248	7.89676	12.8079	11.8849	11.1845	9.68495	11.4705
ZCCHC7	115.594	107.56	102.883	103.121	101.274	25.4852	23.021	26.8571	30.5273	23.2007	14.7132	17.7841	19.3185	17.0707	21.4513	23.0461	22.61	31.4753	20.7639	25.7708
PAX5	0	2.02704	0.561895	1.11622	0.866118	1.02591	0.523953	0.247583	0.565639	0.883118	0.559807	1.01261	1.59138	1.22472	0.744624	2.13266	2.38302	2.27167	3.36066	1.18649
MELK	12.7614	11.051	10.8342	8.06284	12.522	27.9041	29.7766	25.9495	31.6735	31.0204	48.0515	49.2558	48.8507	48.2065	51.9977	43.0182	39.0246	36.4844	36.4512	43.7399
FRMPD1	0.161307	0.0539793	0.266598	0.264293	0.0684574	0	0	0	0	0.0697477	0	0	0.107642	0.11596	0	0.126312	0	0	0.0613332	0
KDM4C	41.55	41.371	35.6442	39.803	43.2776	4.28814	4.2197	2.97179	4.34901	2.98805	1.37833	2.10379	1.74691	2.63469	1.67881	2.37773	2.6018	2.40759	1.83111	3.09959
DNAH6	0	0	0.0338248	0	0	0.0310928	0.0635544	0.059575	0.0679899	0	0.0336753	0.0609196	0.0273058	0.05883	0.0596435	0.128181	0	0.0303578	0.0311272	0.0356239
CHRNB3	0.709036	0.712927	0.221701	0	1.13897	0.202726	0.2071	0.390681	0	0	0.44168	0	0.53789	0	0.783077	0.841146	1.04382	0.398263	0.408005	0.233932
CHRNA6	0	0	0	0	0	0	0	0	0	0	0	0	0	0.214269	0	0.233231	0.694763	0.441694	0.452449	0.778438
UCHL1	543.296	528.379	595.956	546.513	565.703	56.6084	54.4208	67.7493	77.3914	58.7977	22.9222	20.9843	23.3855	17.6129	15.6167	4.25975	6.87529	7.81445	5.67986	5.33223
ANXA5	88.7461	76.6496	83.7534	97.5214	78.3762	93.3803	112.838	79.2917	99.3462	103.146	54.6298	62.66	59.0813	59.5267	59.4433	27.1944	19.9591	20.8241	12.3856	26.0459
FGFBP1	1.48052	0.996428	1.26362	2.51815	1.29953	2.28479	5.2469	2.78659	3.82493	1.3267	3.78057	9.68659	2.56495	2.76422	5.59819	10.2141	7.18212	11.9375	15.1128	8.03292
FGFBP2	2.29217	1.73096	0.722473	1.43625	2.59895	1.31615	0	0	0.363835	0.757349	0.359977	0	0	0.315205	0.638709	0.342939	0	0.973947	0.332377	0.381698
ZMYND10	7.10681	10.4737	5.42697	7.6126	6.88962	0.291119	0.892004	1.68811	1.92865	0.669124	0.318082	0.575357	0.516833	0.278433	0.282122	0.605966	0.301031	0.28685	0.881205	0
PROM1	0.173746	0	0	0	0	0.198036	0	0	0	0	0	0	0.174401	0.0939412	0.0952261	0	0.20295	0.0969078	0.19866	0.341303
TAPT1	26.4408	22.4779	20.4122	26.473	21.0833	2.67463	2.10232	3.16127	4.62386	2.46539	1.89863	2.32339	2.26519	2.4403	2.5726	5.31536	5.90474	7.85396	4.43789	6.50171
LDB2	0	0	0	0	0	0.330477	0.506562	0.475727	0.814558	0.753741	1.16528	1.13506	0.945229	0.939954	1.19105	6.82517	4.06103	5.65684	4.80465	5.50197
QDPR	4.76373	7.60518	7.5689	2.00881	6.22543	1.37338	3.739	0.889889	3.05222	2.64696	6.03649	2.72955	4.09195	1.76379	1.7865	9.10989	7.63377	6.80632	7.428	5.87335
GTF2E2	162.819	153.339	158.688	161.629	140.29	64.2255	74.6391	81.251	91.0109	68.3128	59.8851	68.3915	55.4307	53.9493	52.6463	50.9885	48.7132	49.1955	52.5007	59.1485
SMIM18	0	0	0	0	0	0	0	0	0	0	0	0	0	0	0	0	0	0	0	0
ADGRL3	1.89568	3.75328	1.69694	2.52337	1.74297	0.23977	0.183773	0.172445	0.131217	0.273201	0.649842	0.470228	0.368928	0.397434	0.805809	0.865838	0.735822	0.585847	0.420426	0.825119
MPDZ	0.232982	0	0	0.214804	0.296728	0.397904	0.271084	0.254434	0.943847	0.45349	1.3663	0.0650433	1.16648	1.8221	0.828036	0.547513	0.135719	0.259318	0.930454	2.20668
RFC1	64.0818	67.1587	55.7971	63.6845	59.758	5.45613	6.31878	5.67405	11.6588	5.18666	6.51334	6.33757	6.08426	5.51961	6.64431	12.8686	10.8062	12.0113	9.6672	12.2202
RPL9	102.804	101.186	113.759	95.7935	109.426	342.036	308.701	315.736	296.322	337.047	367.936	371.607	341.752	352.264	406.112	538.181	534.645	460.981	616.758	527.617
LIAS	30.3485	32.744	29.2467	26.582	26.0846	9.069	7.71961	12.8865	11.1096	6.07085	2.47395	3.23196	4.68836	2.88649	2.43749	7.85387	6.24038	4.95758	6.34698	3.20421
UGDH	64.734	65.0573	64.1397	69.1355	64.2966	78.2014	79.5739	76.3056	73.5646	80.3778	64.3982	50.6148	73.2292	89.282	73.2477	57.54	56.9375	53.8725	46.7711	57.0699
SMIM14	74.9556	56.2272	71.7294	67.3325	62.9589	4.68721	8.42779	7.58372	10.7226	6.22455	3.06203	4.43114	4.64003	2.85659	3.79983	0.194369	0.771736	0.368129	0.942908	1.29726
UBE2K	64.5683	62.2263	59.0501	70.0477	60.6652	40.4858	35.4995	37.9258	39.6541	36.96	37.2909	28.0823	34.264	30.1632	31.1546	40.0374	36.625	36.437	37.3381	37.2243
PDS5A	140.671	156.105	135.823	145.24	141.389	167.182	177.639	179.505	195.315	175.487	181.912	186.574	189.28	197.741	172.359	135.573	135.863	151.137	116.852	137.325
RHOH	0.807395	0.818374	0	0	1.08958	0.945797	3.85769	0.934779	3.21298	3.3422	3.17068	0.955597	2.58891	0	0.94122	3.02788	2.01797	0.954012	2.92078	2.25258
CHRNA9	0	0	0.232462	0	0	0	0.217082	0	0	0	0	0	0	0	0	0	0	0	0	0
HASPIN	116.965	122.753	114.473	116.095	118.335	24.4701	24.8101	21.6651	26.5058	24.9852	30.1769	35.7075	39.4876	41.9077	37.5373	22.8212	23.9021	24.1318	22.4434	24.3918
FAM184B	1.15024	1.06639	0.329857	0.327132	0	0	0.309175	0.484243	0.442242	0.115092	0.32847	0.594194	0.177652	0	0.194002	0.208435	0.41347	0.592279	0.10118	0.115888
NCAPG	210.27	232.46	196.472	221.484	204.92	194.862	218.344	217.083	212.45	223.483	205.818	205.481	227.138	239.917	202.445	166.781	159.298	146.22	147.332	160.375
LCORL	58.0731	55.9368	48.6127	58.7791	50.1025	10.3295	11.6593	11.5777	12.7643	9.89287	8.41027	7.60714	9.75651	10.8023	9.56992	11.2371	11.6135	14.2601	10.6562	13.0234
SLIT2	0.0955308	0.0958974	0.118364	0.0586667	0.0607866	0.217454	0.333341	0.416975	0.356939	0.371584	0.294624	0.959362	0.716815	0.720719	0.417513	3.30858	3.55821	2.49672	2.34185	2.49383
LRBA	19.4489	22.049	15.6868	20.0182	20.2997	12.9153	13.6046	12.8433	14.2724	14.6071	8.97919	12.3554	12.6652	12.225	9.89806	9.90857	9.41719	8.69756	6.35698	9.55026
MAB21L2	0	0.206746	0	0.255819	0	0.235325	0	0	0	0	0	0	0	0.449082	0	0	0	0	0	0.271918
RPS3A	126.174	141.442	159.896	132.192	133.381	509.981	486.914	486.061	422.74	472.612	655.706	619.928	611.493	604.593	645.344	779.283	764.241	564.93	837.25	784.109
QDPR	1.36447	2.40593	4.31803	3.43581	1.7755	0.392545	3.60743	2.28409	0.870222	1.81133	0.860769	0.778459	0.699841	1.13116	0.381964	2.05057	0.815702	0	0.794585	0.456584
QDPR	7.58487	8.67955	8.42341	5.81146	9.99589	5.26981	1.1952	3.42952	2.6154	4.08219	1.29246	1.75315	1.05236	1.7012	1.14841	1.2325	1.2279	2.33207	2.38444	1.37326
QDPR	4.82004	6.79752	4.46786	5.65442	5.42752	2.21703	3.39588	2.14834	2.45527	2.98121	3.23844	1.8305	1.31626	2.12746	0.359212	0.77141	3.06796	1.46039	1.86856	1.2881
SH3D19	8.70038	10.5814	7.41146	10.463	8.34589	21.2907	21.754	16.8242	21.072	19.9954	36.905	33.6365	38.4698	33.2549	31.9466	34.7265	39.2784	40.0566	28.0671	35.1637
FHIP1A	25.1915	27.2447	24.8189	25.6301	28.3248	8.04046	9.89896	8.74346	11.5045	8.29692	10.6397	9.68577	11.079	11.2753	12.0384	7.18619	9.65135	8.60187	5.96357	9.95083
GATB	15.7716	15.8415	15.1458	16.0698	15.9203	8.61393	8.25174	6.30859	7.67422	7.37421	5.26134	5.07606	6.26059	5.62049	5.28291	4.34037	4.63639	4.5327	5.07797	4.82655
DCTPP1	561.866	567	580.215	570.838	555.988	243.206	249.412	280.287	287.132	243.15	103.266	98.1133	97.5606	93.0423	95.5878	64.6411	78.7285	62.2005	70.2172	73.1362
FBXW7	64.9252	67.7683	53.5547	67.3304	65.6201	21.2726	18.1037	19.4024	21.001	16.1384	15.2788	16.5562	14.6009	17.1832	13.7345	18.2847	16.917	15.2745	13.142	16.728
MND1	13.585	15.4719	16.7687	10.1895	15.6876	25.383	17.0524	21.3922	22.4187	18.8778	31.1659	33.3742	33.4066	32.9386	31.169	38.2272	37.7234	29.6771	38.4594	41.7376
TMEM131L	46.8652	49.7928	42.3101	51.3544	48.3729	4.54266	4.17792	2.76037	7.04796	4.92011	6.48769	5.71954	6.59453	6.45833	6.547	12.4276	13.4085	13.4007	11.6881	12.2536
TRIM2	14.6966	13.5754	17.1221	13.9113	16.0733	0.541003	0.690959	0.390081	1.78149	0.463614	0.293999	0.398872	0.35786	0.514045	0.390776	0.699696	1.11072	0.397611	1.0866	0.778158
FHDC1	0	0.0604345	0.0746485	0.148017	0	0.0685408	0	0.0657459	0	0	0	0	0.180855	0.0649438	0.0658364	0.424437	0.490995	0.536067	0.274776	0.235953
ARFIP1	62.3583	58.9442	60.3503	60.2417	64.7462	7.66036	7.49337	9.0966	15.0435	9.13458	7.26973	7.05633	7.05175	6.82199	7.38577	17.3876	17.2555	18.3853	11.6309	20.0907
SFRP2	0	0.333557	0	0	0	0	0	0.369203	0	0	0.417406	0	0.339338	0	0	0	0	0	0	0
PLRG1	201.895	203.334	192.099	216.046	206.637	227.909	237.242	259.461	261.326	261.224	225.343	242.679	243.867	244.411	229.887	182.2	180.87	151.525	167.481	175.96
FGG	0	0	0	0	0	0	0	0	0	0	0.227635	0.205884	0	0	0	0.216762	0.430408	0	0	0.964566
LRAT	0	0	0	0	0	0	0	0	0	0	0	0	0	0	0	0	0	0	0	0
NPY2R	0	0	0	0	0	0.403323	0	0.391278	0	0	0	0.400062	0	0	0	0	0	0	0	0
MAP9	19.8003	27.1637	13.1643	15.3903	17.7861	1.6509	3.54201	3.01859	3.62829	2.26608	4.84951	4.22375	5.1024	5.34004	6.20822	5.13012	5.43063	9.06904	6.30573	6.0865
GUCY1A1	0	0	0	0	0	0.143835	0	0	0.157931	0	0	0	0.126902	0.136717	0	0.595474	0	0.422974	0.288966	0.165568
GUCY1B1	0.317155	0.47823	0.792266	0	0.203499	0.181234	0.185154	0	0	0.207431	0	0	0.480438	0.172536	0.174864	0.563522	0.372887	0.177885	0.182256	0.417888
FABP2	0.296248	0	0.373766	0	0.384167	0	0.347557	0	0.376486	1.95919	2.60734	2.69493	1.21088	1.95708	0.660932	92.2642	88.5364	73.2321	88.7271	89.662
USP53	2.44508	2.62495	0.942679	1.55808	2.58222	0	0	0	0.105318	0	0	0	0	0	0	0	0.098462	0.0940336	0.0963856	0
MYOZ2	0	0	0.303072	0	0	0.276505	0	0	0	0.317595	0	0.273104	0	0	0	0	0	0	0	0
SYNPO2	0	0	0	0	0	0	0	0.127794	0	0	0	0	0	0.252604	0	0	0	0	0	0
KCNIP4	0	0	0	0	0	0	0	0	0	0	0	0	0.137703	0	0	0	0	0	0	0
ART4	0	0	0	0	0	1.29844	1.7676	0	0	3.00022	0	0.42974	1.15939	0	0	0	0	0.857229	0.438585	0.504275
GPANK1	29.1008	33.3364	33.301	30.4293	36.2012	6.83667	6.30801	8.93049	8.74282	7.33075	8.41357	7.39217	10.15	9.88414	8.73795	13.506	11.8193	13.2225	9.77	8.91359
MXD4	0.0928333	0.186486	0.115398	0	0.237082	0.952517	0.540723	0.508235	0.11604	0.724778	1.26406	0.831509	0.559382	0.401751	1.32353	1.53136	2.06142	1.65767	1.69905	1.21635
NDUFB6	101.035	100.899	129.091	110.792	87.1337	76.905	70.1611	63.8593	68.9453	80.3738	73.8407	72.7048	72.2341	74.9728	53.2687	69.6747	89.8238	81.4402	80.1766	64.5899
MTAP	117.2	110.985	105.263	107.916	122.892	51.1061	58.3319	62.0716	63.9099	58.0575	23.0263	24.461	30.5944	28.4845	26.5894	15.321	16.6126	12.5259	17.8857	21.3161
CXXC4	0	0	0	0	0	0.633715	0.809324	0.457287	0	0.181177	0.172326	0	0.699314	0.452043	0.152722	0	0.325619	0.310754	0.477639	0.364957
TET2	0	0	0.0499856	0	0	0.0918551	0.0469367	0	0	0	0	0	0	0	0	0	0.0469512	0.0448651	0.0459989	0
PPA2	0.310174	0.103861	0.257242	0.510319	0.132128	1.8867	2.77123	1.92607	1.42283	1.48113	1.9213	2.78045	3.84528	2.911	3.29116	4.02359	3.26567	3.57996	3.90581	2.98298
ARHGEF38	0	0	0	0.165759	0.343248	0	0	0	0	0	0.166379	0	0	0	0	0	0	0	0	0
INTS12	135.993	139.249	144.058	140.195	142.395	20.0223	19.1196	22.8693	32.8295	26.6889	28.2266	28.1038	29.8529	28.8433	26.7068	38.1731	47.0967	45.3439	43.8204	42.7192
G3BP2	87.1438	69.9865	71.3209	86.509	78.1401	54.3044	57.9354	55.9237	60.6215	53.4164	41.0065	41.0446	47.1716	51.4381	50.6747	44.4325	53.7804	34.8399	36.4734	51.4112
USO1	66.8182	70.7995	63.2859	70.2129	73.0423	26.5622	22.0951	31.7634	31.5609	24.0297	14.2626	14.8217	16.0013	15.6469	15.4131	26.862	31.7018	28.4531	21.8739	25.5868
CORO2A	21.6085	20.562	19.4414	20.5677	22.876	18.1533	17.114	17.9552	18.2467	14.6775	16.8961	16.6619	18.563	18.3572	19.1277	28.927	34.8967	27.6102	26.8896	28.6897
ANP32B	550.964	520.205	450.677	488.404	487.287	1569.12	1555.09	1420.58	1442.75	1407.5	1838.13	1830.92	1716.26	1666.97	1557.58	1593.27	1587.98	2203.11	1358.97	1703.22
TRMO	12.3934	14.6949	10.5522	17.6519	13.6971	4.81701	6.21514	6.11774	6.42927	6.69193	1.93659	1.75151	2.02228	1.93676	4.41582	2.63485	2.87867	1.49687	2.55515	3.81125
FOXE1	0	0	0	0	0	0	0.334369	0.633626	1.44804	0	0.716349	0.9718	1.45534	1.25449	0	0.34122	0.678267	0	0	0.379781
SH3GL2	39.7251	31.394	31.7457	25.9759	33.6643	6.49658	5.45121	6.48987	7.92398	5.58725	2.02402	2.28825	2.25999	1.77086	1.57024	1.92751	1.43554	2.05328	0.701063	2.41256
CNTLN	18.9677	21.7465	15.0135	20.7823	18.0995	2.29562	1.36837	2.38769	4.08851	2.40088	2.28406	1.972	2.35826	2.17761	1.28766	3.45868	2.45022	4.68006	3.35799	3.07674
BNC2	0	0	0	0	0	0.162696	0	0	0	0.0927639	0	0	0.0715876	0.0771204	0.156356	0.0839982	0	0	0	0
PSPC1	19.8402	19.6253	16.4546	17.5123	20.5723	12.5166	13.158	14.3225	15.3585	13.7031	27.6451	27.8614	27.5705	28.8401	30.4545	40.4229	42.9216	40.5952	37.7618	37.4354
DNAJB14	0	0	0	0	0	3.92386	2.89493	3.57269	4.32053	3.99749	6.415	7.30623	6.75219	9.3533	8.00429	7.0138	9.43504	9.42664	8.33969	9.31319
SUGT1	192.202	171.448	176.798	185.229	176.173	82.3568	82.2639	97.3849	94.6602	74.7722	38.5452	38.6689	38.4885	41.4669	36.1332	23.2032	16.5435	23.7701	19.2356	23.4658
CHST10	13.0259	12.9071	11.0324	16.9073	14.2932	9.86386	8.28493	7.81915	10.1374	9.29571	12.1847	10.3721	12.2217	11.9136	14.6151	15.0158	12.1985	12.0644	15.8894	16.4523
SNAPC3	33.0439	34.0253	32.9298	25.0954	25.9566	5.53939	8.3376	9.86193	9.01372	9.38166	6.05253	6.05021	8.02283	6.41349	6.781	15.7785	15.6769	16.9493	13.826	14.52
PSIP1	60.2569	47.0273	52.2478	45.1516	45.4334	20.8688	22.1789	33.2407	31.4389	24.9468	8.93301	7.24341	10.0095	11.3239	9.01546	4.69444	4.95529	4.72236	4.267	4.2445
LONRF2	0	2.0481	0.695137	0.460099	0	3.38914	1.29832	2.24584	2.56499	3.1553	2.30819	1.87887	5.62233	3.63447	3.47865	6.59388	4.14621	4.99517	6.60961	8.55819
EDNRB	0	0	0	0	0	0	0	0	0	0	0	0	0	0	0	0	0	0	0	0.348836
GK	13.1906	11.3216	12.9484	12.4829	11.4027	3.89432	3.6327	3.74822	5.02447	2.5182	1.84239	1.99964	3.58904	2.7389	3.2658	2.63118	3.82995	2.99016	3.57446	2.53642
TIMMDC1	74.8768	64.5725	67.4855	55.2814	67.5602	13.229	7.36785	10.4996	10.2232	10.6395	13.1894	16.3017	10.7242	12.3262	11.7061	23.0423	22.9169	21.4131	23.1322	23.3219
POGLUT1	18.3808	14.0466	16.3623	13.6415	15.6135	4.53309	7.8985	7.72478	8.82456	5.20482	4.65772	3.68599	4.72917	6.36923	2.83975	7.20885	5.78372	4.72527	6.18354	6.47893
PWP2	123.053	127.277	108.497	114.178	125.837	74.511	77.9559	88.1505	88.6451	83.4565	52.6682	45.419	58.5497	62.3995	51.6982	34.8982	36.0819	27.9326	26.2423	37.5792
GEMIN8	127.497	116.569	115.011	102.27	116.52	19.6612	21.602	27.3571	29.2819	20.5463	19.5338	20.0222	19.8381	19.3798	24.5454	34.7332	37.901	42.572	36.377	37.2732
CBS	7.70448	7.40378	7.50542	7.99688	7.28191	0.50955	0.390481	0.367306	0.698924	0.727556	0.553666	0.375584	0.336946	0.121	0.122647	0.527058	0.130721	0.249594	0.127898	0.586143
CRYAA	0	0.279291	0	0	0	0.31847	0.650495	0	0	0	0	0	0	0.609888	0.308966	0	0.329736	0	0	0
HSF2BP	2.64415	2.32597	3.71722	2.45981	1.90962	1.51134	0.578999	2.36535	0.831145	0.216287	0.822803	0.744188	0.333976	0	0.364667	0.391721	0	0.370954	0	0.217872
ANKRD10	20.5301	16.2259	17.071	22.1696	19.9706	11.994	15.192	15.5058	14.5392	18.9855	12.5588	9.70215	11.049	16.2541	15.5434	21.9273	19.0538	20.0544	21.5078	20.238
CARS2	12.2548	10.4901	13.5873	11.2453	10.9137	0.656105	0.574665	0.179967	0.924482	0	0.7121	1.19616	0.577676	1.15575	0.991332	2.1302	1.5365	4.3106	2.16223	2.58402
IRS2	21.1286	19.2199	16.4616	16.5386	18.5674	4.0466	4.63924	6.34953	6.05838	4.5048	2.46419	1.35668	1.9991	3.08999	2.278	3.56926	3.03435	3.28417	1.78214	2.38136
LIG4	15.8606	15.8215	16.5233	17.3636	18.1251	7.82847	7.34321	5.67412	7.60483	5.42417	6.83311	6.43266	6.33672	7.68005	5.06616	8.09775	6.58498	7.29235	6.95812	7.52924
NALF1	0	0	0	0	0	0	0.151632	0	0	0	0	0	0	0	0	0	0	0	0	0
CCKBR	6.05843	4.78869	5.42791	4.58225	2.78884	0.495647	0.759427	0.717476	1.09274	0.853044	0.27038	0.48908	0	0	0.23975	0.257503	0	0	0.249724	0
CD28	0	0	0	0	0	0	0	0	0	0	0	0	0	0	0	0	0	0	0	0
RAPH1	28.3926	27.391	24.4849	33.7545	29.0929	9.64504	11.6238	12.186	13.9093	11.3716	8.9439	10.3079	11.5246	11.848	11.1804	15.4454	14.9063	18.6624	13.8657	18.0122
ALG11	21.3827	25.1513	29.6216	19.1263	21.7366	5.5994	3.52064	6.07499	5.51752	3.61018	6.2436	4.09419	3.92681	4.50344	5.67116	6.5383	7.37211	3.94058	8.22057	4.958
CPB2	0	0	0	0	0	0	0	0	0	0	0	0	0	0	0	0	0	0	0	0
ZC3H13	126.264	121.363	87.8953	114.644	126.622	86.7661	94.3748	95.7044	109.463	88.1039	81.0915	83.9019	78.8298	77.8876	69.669	72.7491	71.9252	82.6278	64.5024	76.1179
TM9SF2	57.5875	60.7096	60.8046	59.3374	59.1232	114.042	109.639	107.126	108.085	112.069	140.261	140.874	132.326	134.925	136.886	141.967	158.268	119.858	144.305	157.287
ZIC2	2.6185	2.94176	3.07715	4.00837	2.96391	636.262	790.288	764.178	664.64	788.112	564.332	527.741	572.835	595.039	587.116	432.62	410.737	466.177	403.848	437.19
PCCA	56.0122	57.1065	52.2785	52.0096	65.775	52.4793	55.683	56.4019	57.4545	55.5028	57.1829	53.1756	53.8791	54.5935	46.6532	49.285	45.3065	43.7773	43.242	47.3796
MARCHF4	11.2265	11.0521	12.883	11.5802	16.3918	4.19733	2.28643	2.16264	3.39718	2.57155	2.44497	0.82923	0.744817	1.07	0.813156	0	0.578392	0	0.56448	0
VPS8	2.58214	2.27874	3.01206	2.50509	2.39533	0.713255	1.00217	0.599065	0.488462	0.305093	0.580506	0.525064	0.706361	0.760958	0.857092	0.828794	1.0046	0.610587	1.96705	0.819166
C3orf70	0	0	0	0	0	0	0	0	0	0	0.0937085	0	0.15203	0.0818901	0.0830124	0.0891913	0.0884521	0.0844833	0	0
TMEM41A	0	0	0	0	0	0	0	0	0	0.257402	0	0	0	0	0	0	0	0	0	0
IGF2BP2	0	0.21213	0	0	0	5.79566	5.92014	6.05781	5.58885	4.15517	13.6972	10.9588	11.7655	15.6726	12.3787	12.292	18.1864	18.7647	12.8944	15.9092
UBAC2	15.2584	16.2142	14.8241	14.455	13.0173	1.23066	0.754246	0.712538	3.25565	0.847168	0.537037	0.485713	0.872306	0.70488	0.476194	0.767185	1.0159	0.968551	2.48006	2.5608
DACH1	2.16573	1.69248	2.84738	1.93281	2.46329	0.274622	0.140296	0.396051	0.904384	0.156904	0.746246	0	0.242229	0.13048	0.264508	0.568328	1.55066	1.21109	0.965321	1.10611
MZT1	0.363495	0	0.46089	0.917053	0.473808	33.0734	32.059	27.226	29.2642	29.9719	41.8068	36.5622	42.9637	37.0369	46.0806	33.2744	28.3081	19.8902	43.6771	38.9986
BORA	234.607	228.314	233.515	233.805	226.789	51.5703	60.0518	55.9383	80.7659	62.642	74.564	81.1493	88.0908	98.256	91.4035	55.2324	53.9881	69.9008	49.4139	57.0047
DIS3	100.147	93.9147	96.5295	112.509	97.1405	30.9508	37.4222	39.0457	44.0129	38.4499	23.5426	24.3357	29.6785	28.4208	25.2067	22.0111	29.9101	24.7639	23.6958	25.5173
METAP1D	50.8893	50.1908	47.0108	54.1061	47.3808	9.62896	9.40398	9.75261	10.2192	9.66836	4.13474	5.40123	4.48316	6.84377	2.44676	5.25385	6.09714	5.80132	2.12025	7.31224
DLX2	0	0	0.322337	0.320284	0	0	0	0	0	0	0	0	0	0.281149	0	0	0.303971	0.289642	0.29659	0
ITGA6	0.150814	0.075723	0.374471	0.464155	0.192326	0.859123	0.702331	0.247372	1.31776	0.39194	1.02542	1.18043	0.604946	1.30341	1.15611	0.266178	0.175981	0.0840427	0.516895	0.394624
EEF1A1	2.5353	1.18951	2.32396	1.88743	1.08535	0.386487	0.592253	0	0	0	0.420885	0.190335	0.512528	0.368124	1.30579	0.400757	0.19891	0	0.583213	0.222901
KCNQ5	0.265845	0.356005	0.110121	0.109211	0.339356	0	0	0	0.11073	0	0	0.0991842	0.0889624	0.0958394	0	0.104378	0.207052	0.0988645	0.20267	0
RIMS2	0.260884	0.458401	0.161824	0.320892	0.332439	0.148558	0.0759057	0.0712638	0.244033	0.169361	0.161131	0.0728712	0.130695	0.0703976	0.0713643	0.460069	0.0760345	0.145266	0	0.0852558
CENPK	77.7846	81.9341	83.3309	56.889	70.0367	39.9911	33.9065	35.5823	36.6114	40.8073	44.7922	48.5103	51.2129	52.4321	39.9742	42.6612	44.8039	41.4216	36.8889	43.5389
LBX1	0.239041	0.240542	0.900981	0.298356	0	0	0	0	0	0.314713	0	0.270628	0	0.261892	0	0	0	0	0	0
SLC2A7	23.3341	22.867	23.2355	23.8168	20.2813	1.82625	0.699575	1.10077	2.76603	3.14083	0.74668	0.450218	1.01056	0.217756	0.441344	0.711067	1.64752	0.44887	0.919582	1.05481
FGF8	0	0	0	0	0	0	0	0	0	0	0	0	0	0	0	0	0	0	0	0
DPCD	21.6834	21.0548	19.9122	15.7535	16.798	28.2515	18.4402	18.4591	18.0162	20.8915	36.1396	33.6034	39.7503	46.8508	40.6743	51.9127	57.4537	62.9023	61.537	61.0537
POLL	189.51	177.009	177.293	185.825	178.703	13.7656	11.9636	16.2352	21.7075	15.2989	12.5348	9.11013	12.7212	11.9435	11.3104	19.609	15.8702	19.1741	16.3346	19.9172
WBP1L	19.22	19.5986	20.3556	19.2771	20.9194	1.45027	0.888744	2.2425	3.52278	2.6666	1.90144	0.859848	2.05968	2.21922	1.68647	9.05589	10.497	12.0032	8.19424	8.06221
AS3MT	3.74996	0.503203	2.51475	1.5616	1.2922	1.7202	2.04977	2.21631	0.949524	1.64714	0.626413	1.13308	1.01779	0.54831	0.555581	0.895001	0.592799	0.282451	0.867712	0
CNNM2	0.166495	0.0836045	0.206821	0.30765	0.424896	0.0948728	0	0.18217	0.415911	0	0.514868	1.11766	1.00243	1.07992	0.547348	8.23309	8.16548	8.54104	6.6612	8.06498
NT5C2	0	0.407078	0	0.167056	0.69186	14.647	14.3347	14.2386	16.7662	14.9846	18.9478	24.7207	22.5905	31.6684	23.7761	42.6231	40.87	52.0081	28.5057	43.8554
INA	0	0	0	0.239332	0	0.220293	0.225036	0.424786	0.242584	0.505003	0.480237	0.868694	0	0.42013	0.425764	0.228659	0.227039	0.21652	0.443594	0.254389
ANOS1	0.312611	0.628486	0.975981	0.387464	0.401097	0	0	0	0	0	0	0	0	0	0	0	0	0	0	0
STS	8.87792	11.0266	6.74779	7.34677	10.2879	1.39344	3.0504	2.30144	2.84739	1.59592	1.51776	0.392211	1.93633	1.89652	1.92204	1.03229	1.63965	0.391016	1.20176	0.918679
PNPLA4	3.76495	5.83234	6.20867	5.80848	6.38132	0.665252	1.01908	0	2.20711	0.765709	0.727893	0.987459	0.88731	0.31869	0	1.04018	1.37849	2.29761	0.672075	3.47326
PUDP	31.9425	22.8565	41.9081	35.1361	27.795	17.8999	24.1003	28.5509	21.2455	18.3757	2.36904	3.74958	4.57038	2.0734	2.88882	3.66667	0.560367	2.13637	1.91438	1.56927
NLGN4X	0.0756523	0.151939	0	0	0	0.0861923	0.264232	0	0	0.196611	0.0935246	0.0845924	0.455194	0.326917	0.0828495	2.40344	1.50073	1.09613	2.16077	1.48468
PRKX	6.68698	6.0434	6.82543	6.9509	6.82149	0.677177	1.29748	1.13735	3.61666	2.02729	0.826588	0.830716	0.96851	0.963107	0.894951	0.786738	1.04027	1.24202	1.27316	1.16638
MXRA5	0	0	0	0	0	0	0.0904487	0.0848256	0.145219	0	0.0479484	0.173479	0.233298	0.0837739	0.0849298	0.18252	0.271408	0.172903	0.221592	0.202913
GYG2	0	0	0	0	0	0	0	0	0	0	0	0	0	0	0	0	0	0	0	0
CD99	3.18701	2.69007	2.22411	2.52196	1.79529	1.16419	3.86579	2.37918	2.39693	1.49705	1.42398	0.85863	1.54082	1.24499	1.68252	0.753131	0.448373	1.56921	1.31568	1.00514
DHRSX	0.646567	1.3916	1.03333	2.04967	1.17941	0.105301	0.107599	0.202265	0	0	0	0.310237	0.371032	0	0.607765	0.544146	0.539728	0	0.528267	0.605092
CREB1	29.9587	27.4908	31.6383	25.8277	34.6759	48.4147	47.9259	52.8639	54.9523	48.6071	50.6599	51.7313	48.1471	54.3241	57.9508	57.1335	58.0499	49.891	52.1867	70.9803
CHMP2B	165.626	182.702	177.224	180.476	180.136	176.623	197.621	170.49	163.433	175.126	120.556	110.975	128.455	125.683	115.329	88.0295	83.5749	97.7507	77.9063	89.6047
ZNF654	16.0793	16.3242	11.7558	14.7531	13.3741	17.8989	19.6875	17.0379	18.5499	19.155	19.4839	20.7056	23.9147	24.7918	20.3423	23.1264	20.6939	20.5041	17.9388	24.9289
ARL13B	2.05037	1.07881	1.33552	0.842946	1.49664	7.23655	8.64571	7.16535	7.93598	7.87991	9.30967	13.8883	12.458	14.1608	11.2477	14.8463	15.069	21.9102	13.8538	17.0214
NSUN3	0.362243	1.27487	0.226596	0	1.16413	4.55783	2.5397	2.79519	4.10444	2.37349	4.51438	3.87887	3.11549	4.54127	5.40269	3.65391	4.05437	4.47771	3.3361	1.91287
EPHA6	0	0.0640253	0.158201	0	0.0812486	0.0726196	0	0.0696679	0.0795221	0.0827836	0.236284	0	0.127767	0	0	0.0749607	0	0.142012	0.145581	0.0833456
ARL6	16.245	16.9642	14.3796	12.3169	14.1667	10.8147	7.18164	8.5038	9.90916	6.80765	6.08223	12.2444	8.9189	10.2953	8.6952	15.1315	11.8668	14.5065	12.3255	13.9223
SLC5A7	0	0	0.0851815	0	0	0.0781888	0	0	0	0.0891507	0	0.076717	0	0	0	0	0	0	0	0
KCTD12	0	0.266133	0	1.3228	0	0	0	0	0	0.348796	0	0.299904	0.269425	0	0	0.631752	0.313876	0.299047	0.306206	0
LMO7	70.9583	73.1879	63.8601	68.2853	78.7934	5.2869	4.7118	5.71862	9.08423	4.06297	2.93259	3.37595	2.48654	1.92166	1.5939	0.951465	1.00626	0.721035	0.246399	0.564184
KLF12	4.51335	4.68779	3.00476	4.10028	5.01653	0.687547	1.05365	1.32362	1.32253	0.39333	0.748198	0.676716	0.759139	1.30859	0.663137	0.17809	1.0605	0.168655	0.172808	0.19809
KLF5	0.256194	0.385845	0.158901	0.0787728	0.326432	3.79289	5.14311	3.28888	4.3132	6.652	5.77501	9.65987	6.15996	7.60374	7.77825	6.85161	6.86867	5.20639	5.62968	6.86459
PIBF1	65.4126	73.8739	63.7481	67.2463	65.6256	23.8429	24.7408	29.0865	28.4637	23.2806	18.9246	20.7588	18.4049	18.772	18.3142	21.0812	19.2658	19.6036	17.6108	19.7499
GPALPP1	44.2149	49.0003	51.5478	46.7243	41.6824	50.1429	57.5216	56.3484	57.2791	60.5044	56.6885	66.7534	63.1384	72.2022	62.4635	54.2579	55.2189	55.6751	57.0213	57.1008
GTF2F2	85.2432	97.8842	88.211	89.2849	85.467	108.141	88.0018	106.115	107.967	99.1742	87.0461	102.698	101.29	97.4141	95.249	94.3287	89.7317	83.0238	96.6271	98.1579
TPT1	562.744	568.463	610.036	568.812	573.765	1806.87	1757.68	1594.09	1672.79	1687.08	2086.57	2055.89	2038.21	2082.4	2060.02	2624.52	2409.77	2259.75	2792.44	2404.12
PVR	2.40524	1.21019	1.81333	3.90317	1.55291	0	0	0	0	0	0	0	0	0	0	0	0	0.271545	0.278085	0
PVR	4.06302	3.06499	5.34588	5.81419	4.70844	0.232565	0.712695	0.672953	0.512434	0	0.253601	0	0.41188	0.221882	0	0.241509	0	0.228681	0	0
USP38	59.7821	60.325	58.6434	65.7033	61.4241	15.8499	19.5429	19.2819	23.1708	15.5577	15.1444	17.5375	19.1746	17.3478	15.9585	19.0021	20.6894	13.9642	14.7368	17.973
GAB1	66.7222	70.1272	60.0141	71.3556	67.5618	18.7041	15.8876	17.7962	23.4258	18.3573	16.352	16.4165	18.7499	21.0967	18.8077	26.0747	28.1194	24.9304	24.2902	26.4553
FREM3	0.108363	0.398797	0.357736	0.26593	0.183711	0.0821854	0.0419962	0	0	0.140369	0	0	0	0.0388915	0.0394284	0	0	0	0	0
HHIP	12.9812	9.54936	9.65102	11.2423	9.91341	1.2898	1.66948	0.412645	1.41311	1.07877	2.33252	2.86926	1.81642	1.46761	2.81014	8.34751	8.45444	8.74805	7.32905	9.18299
SMAD1	0.121915	0.122498	0	0	0	3.61768	4.26498	1.73921	5.04077	4.61119	9.98239	11.4912	10.0645	10.1817	13.0006	17.4223	18.5719	17.3188	14.5339	17.9351
MMAA	74.2157	79.6887	75.3902	83.3467	80.3074	44.3133	51.1299	54.4739	51.3439	47.6507	24.2835	24.4536	23.1753	21.9029	21.7522	9.05944	16.5716	13.9962	11.5618	11.9359
AEN	37.692	36.2211	31.8822	33.2171	39.2787	3.14737	3.21616	5.06541	5.68092	3.90734	1.20559	2.81699	1.30401	0.7024	1.69104	0.286876	0.474191	0.634036	0.278531	0.531652
ZNF827	0.0448735	0.090088	0	0	0.114188	0.765998	0.626255	0.342688	0.894	1.45419	1.54966	1.2515	1.43627	1.69229	1.76463	4.47697	4.69955	4.49048	3.93884	4.97732
LSM6	43.3123	36.5844	46.6832	21.377	35.4277	128.218	129.42	106.7	107.427	121.423	140.487	142.226	115.725	116.681	118.121	178.456	133.655	84.7393	151.366	121.79
POU4F2	0	0	0	0	0	2.88054	3.08332	3.42886	3.91491	3.91851	2.53459	3.37128	3.50865	2.60688	2.37809	0	0	0.268851	0.137759	0
EDNRA	0.136077	0	0	0	0	6.37088	5.87406	8.52077	6.31554	11.5491	21.632	19.2598	24.0031	26.0074	26.6594	47.625	44.2262	51.9607	39.9724	43.3065
TMEM184C	17.9723	18.4267	15.1687	17.7231	18.7797	10.4477	8.8974	9.18462	12.3893	8.36217	10.9228	13.051	10.554	11.7819	12.8398	12.3846	14.9514	13.4943	11.4038	16.6944
PRMT9	25.7429	37.4955	28.2673	31.5118	30.1888	8.97769	10.2214	8.38238	11.2591	7.91122	9.05844	10.7141	11.6475	10.5989	11.2371	10.0824	10.0027	8.92104	7.46868	9.14724
ARHGAP10	45.3352	45.8287	43.0289	46.3729	47.1646	0.771524	1.80194	2.32918	3.8677	2.13892	1.07722	0.64955	0.679759	0.627695	0.848353	3.75973	3.27733	3.99272	2.21205	2.4072
NR3C2	0	0	0	0	0.131931	0	0.120309	0	0	0	0	0	0	0	0.113319	0.121745	0.241541	0	0	0
DCLK2	1.90373	1.91152	0.759281	1.67297	1.81978	0.387204	0.316545	0.445831	0.593719	0.706362	0.168007	0.303924	0.272552	0.293616	0.744114	1.75894	0.792827	1.06026	1.39742	1.51124
FAM193A	84.8477	86.6909	68.3736	88.4716	86.4438	7.9108	8.91514	6.59657	14.6545	6.74277	8.33965	8.63116	9.10589	8.47829	8.94988	12.1349	12.6384	11.8561	9.48607	9.50401
TNIP2	0	0	0	0	0	0	0	0.242057	0	0	0.273656	0	0	0	0	0	0	0	0	0
SPARCL1	0	0	0	0.193908	0	0.536349	1.09591	0.17213	0.196564	0.613823	0.583798	1.40806	0.789821	1.02111	0.172483	0.370566	0.183901	0.175464	0.359557	0.412194
GALNTL6	11.9413	11.998	12.939	16.3778	14.2092	0.408819	0.278472	0.786087	1.34627	0.155712	0.148116	0.133967	0.841355	0	0.131249	0.282005	0	0	0.410569	0
GALNT7	39.8713	42.9917	33.7726	33.7474	40.7549	27.8572	28.1115	24.8831	28.2814	27.8631	22.1297	25.1047	21.607	22.1847	23.8166	21.1842	24.5558	22.9954	20.3335	20.9109
HMGB2	1087.43	1003.8	1044.23	1022.04	955.403	3199.48	3471.72	3248.71	2969.74	3204.73	3492.18	3644.89	3341.8	3394.01	3369.86	3471.96	3153.87	4166.61	3299.64	3354.57
HAND2	0	0	0.295793	0	0	0.269919	0.551393	0	0.595585	0.619908	0	0	0.478775	0	0	0.561389	0.557663	0.265762	2.17736	0.937027
FBXO8	74.8181	75.0487	73.9875	73.7405	68.1536	3.13741	4.19088	3.7256	8.51112	4.15262	0.263247	0.952358	1.06894	1.61237	1.63391	2.00563	1.9918	0.474765	0.729425	0.836812
CEP44	7.87017	7.56871	7.70005	8.06822	7.03245	7.04256	6.39523	7.53817	7.10227	9.18498	7.45691	9.05679	8.64833	7.08132	7.17666	9.33192	10.6734	9.41336	10.2344	8.57555
HPGD	0	0	0	0.408914	0	0.374034	0	0	0.8286	0.431181	0.409831	0	0.666326	1.07698	1.09105	1.9525	0.38828	1.47853	0.378346	0
GLRA3	0	0	0	0	0	0	0	0	0	0	0	0	0.159266	0.171588	0	0.373618	0	0	0.181257	0
GPM6A	0.0799126	0.0802519	0.0992436	0.196829	0	0.364243	0.372205	0.437069	0.199571	0.103877	0.988234	1.87708	1.36284	1.98635	1.75092	2.9159	3.918	3.6529	3.74437	3.76526
WDR17	0	0.270962	0	0.0829982	0.171966	0.153681	0.235569	0.0737278	0.252473	0.175218	0.250053	0.0753907	0.135217	0.0728333	0.073833	0.237991	0.0786661	0.0751445	0	0.176411
ASB5	0.385016	1.16161	0	0.478664	0.247676	1.98264	2.02532	4.03546	1.69809	3.78752	1.20059	0.651521	2.14472	2.10065	2.3417	1.82927	0.908156	2.1652	1.55258	1.52633
SPCS3	71.1847	70.8588	81.5547	57.5922	70.6657	93.4434	95.9624	83.2707	90.0692	108.556	128.088	129.151	122.54	129.814	123.482	186.269	154.536	142.137	193.186	174.876
VEGFC	0.168124	0	0	0	0	0.768854	0.392731	0.925724	0.845752	0.88035	0	1.3252	0.509774	0.732292	1.85539	0.199303	0.39568	0.37747	0.580086	0.221703
TENM3	2.27591	1.78521	1.68283	2.46958	1.86129	0.0594988	0.152022	0.170995	0.065049	0.0677194	0	0.203997	0.156747	0.056285	0.114127	0.306593	0.303897	0.348537	0.446717	0.272663
DCTD	74.9935	73.2697	76.2506	69.693	74.5991	22.5383	30.6937	30.1055	33.472	34.8387	15.8023	15.1164	15.7992	12.7671	11.8586	17.367	14.9527	14.7985	14.8741	17.7153
IRF2	58.1719	61.5761	51.2491	64.2487	61.3638	145.992	157.438	166.01	152.937	142.046	100.748	105.182	124.15	141.978	128.927	115.292	91.9423	141.02	99.6356	107.105
TMEM134	58.0083	45.214	50.1753	49.2518	48.1868	232.728	253.574	208.197	217.096	222.519	245.493	270.742	272.173	270.853	278.939	276.62	300.412	306.179	274.535	306.235
STOX2	0.0448562	0	0	0.0550801	0	0.510468	0.417342	0.440429	0.223413	0.11629	0.663885	0.600488	0.628125	0.57999	0.881976	1.63215	1.30493	1.04737	1.12495	1.58042
SOD3	0	0	0	0	0	0	0	0	0	0	0	0	0	0	0	0	0	0	0	0
ING2	318.492	335.743	316.696	302.752	323.772	63.502	54.5571	61.9908	61.3147	65.2319	67.6666	60.7142	56.6999	62.0295	61.9052	65.4665	56.8907	53.0282	73.9058	68.5727
AIP	76.3037	79.1348	78.6987	83.0759	69.6418	55.8038	56.7727	65.19	56.2188	52.275	61.0869	86.3412	62.859	58.4206	67.7547	66.8872	74.6024	57.7601	68.7602	70.7471
CDK2AP2	163.961	169.195	198.387	170.472	172.536	220.032	182.257	203.618	188.888	178.845	210.249	178.494	196.48	221.1	207.429	218.387	197.5	248.559	221.658	190.968
LGI2	0	0	0.288276	0	0	0	0	0.254046	0	0	0	0	0	0	0.254698	0	0	0	1.06102	0
CCDC149	16.6845	19.1657	17.8497	14.3929	17.3836	0.680761	0.173876	0.98286	0.561168	0.194712	0.555578	0.669999	0.751594	0	0.984821	0.176321	0.524977	0.166981	0.342187	0.784486
ZFP91	17.0177	16.1286	19.3929	17.5991	20.0771	35.2615	38.7021	30.7241	32.9625	34.3125	44.3165	47.6664	51.2709	48.8221	47.363	55.8711	55.2923	61.0148	49.5242	58.6497
TESK1	1.30506	4.76816	3.39839	1.0261	0.910748	0.270778	0.415	0.260322	0.29722	0.154697	0.294301	0	0	0	0	0.560333	0.694918	0.39802	0.679825	0.623168
FAAH2	0.159156	0	0.198797	0.197312	0.20425	0	0	0	0.200014	0	0	0.179093	0	0	0	0.188535	0.374267	0.535627	0	0
TXN	179.922	182.502	206.884	157.947	183.776	324.177	286.351	263.954	272.916	314.023	264.204	272.455	291.007	279.434	274.611	395.36	345.117	317.175	403.936	351.984
MAML3	63.5139	64.3471	55.9954	66.1185	64.2988	8.7015	9.09436	8.2195	11.6912	8.26412	8.57753	10.4092	10.1455	9.55549	9.87681	10.6805	11.7367	10.4394	7.66326	11.2698
SCOC	23.7816	23.2222	24.1696	23.143	25.0531	39.7122	33.5749	34.864	41.1071	33.6036	33.6626	37.576	39.7823	41.1835	39.4716	41.1822	37.659	46.1063	34.8364	45.1345
CLGN	43.677	49.0286	41.2033	38.4115	39.9333	24.4997	26.7784	29.9968	28.3068	22.6286	17.1884	17.9275	19.3524	15.9752	16.3294	18.2797	16.2359	18.4295	14.1645	18.3628
NAA15	189.343	208.512	180.064	189.854	203.446	19.2308	18.7954	22.7248	32.4957	19.2323	18.6843	20.8898	16.1077	16.1055	18.7393	30.8783	35.5325	33.5745	28.895	31.0422
HTRA3	0	0	0	0	0	0	0	0	0	0	0	0	0	0	0	0	0	0	0	0
GPR78	0.686116	1.84088	1.14849	2.85205	1.18023	0	0	0	0.289048	0.300854	0	0	0	0	0	0	0	0	0	0
CPZ	0	0	0	0	0.343514	0	0.15643	0	0.168172	0	0	0	0	0	0	0	0.157302	0	0	0
HOXA9	0	0.266944	0	0	0	1.82578	0.932353	0.882658	1.34464	1.04964	0.33263	0.902502	0.540525	0.873597	1.1802	0.316856	0	0.299975	0	0
HMX1	0	0.251602	0	0	0	0.860098	0	0.277039	0.316508	0	0	0.283269	0	0	0	0	0	0	0.289237	0
ADRA2C	0	0	0	0	0	0	0	0	0	0	0	0	0	0	0	0	0.291488	0	0	0.652999
LRPAP1	133.993	153.849	121.139	136.809	149.361	7.72334	7.68233	8.42131	17.8934	10.9423	11.0705	6.80863	10.9653	13.1696	9.02864	22.3479	23.2327	22.7596	20.6574	25.3299
DOK7	1.87724	1.88629	2.18308	2.63007	1.76215	0	0.145954	0.137368	0.156844	0.816336	0.155299	0	0	0	0.275239	0	0.146694	0	0	0
RGS12	11.2969	12.7636	10.0143	11.5525	10.5264	30.7711	33.041	27.8513	33.26	26.7805	25.9472	24.9989	27.2849	27.0497	28.0937	21.5304	19.8604	23.7072	19.5628	20.1737
HTT	30.1747	35.2554	26.5486	32.7905	31.4364	11.6775	15.099	14.55	16.3608	14.314	7.03228	5.73933	7.37382	8.04937	6.69309	4.11524	4.53683	4.44498	4.40807	4.74593
ZNF638	0.125105	0.251416	0.467633	0.154654	0	0	0.145902	0.274637	0	0.163208	0	0	0	0	0	0	0	0.279942	0.143438	0
PAIP2B	229.944	226.655	208.512	196.616	214.262	300.576	289.593	277.699	257.046	270.033	279.854	287.269	239.414	239.819	222.094	230.8	220.524	225.632	213.423	229.556
ZNF200	45.8248	37.8726	39.2847	49.2324	43.6865	20.6971	21.0315	20.8725	20.0665	18.9304	22.1066	23.028	20.0523	23.0138	20.2468	19.0334	19.5841	21.4987	18.5915	23.0065
DTX4	8.69767	12.5396	12.2515	10.5971	12.425	2.87774	2.79324	2.90577	4.26569	3.1247	2.5029	2.12232	3.04677	2.8721	1.80211	2.82954	3.3986	2.25668	1.58989	2.15317
ZNF92	93.6828	98.7013	92.7553	94.646	89.0972	44.3882	44.3388	52.8362	45.7984	46.0902	34.5938	35.9525	36.8071	39.2794	33.5226	30.2802	26.4035	39.524	25.6052	31.6359
MOGS	40.8294	41.9016	34.7407	38.9301	41.2667	7.3883	4.93578	5.73832	5.77188	6.00825	2.93475	4.19116	3.25904	3.78116	3.55877	5.73478	7.44091	7.38107	5.28048	6.70513
FBXO41	0.95465	2.63775	2.22933	2.80147	1.37413	0	0.139141	0.130924	0	0.155605	0	0.401624	0.120111	0	0	0	0	0	0.136762	0
RNF24	0.4023	0.403943	0.415961	0.329941	0.170904	1.98554	2.49725	2.41799	1.67275	1.82842	2.89926	2.0979	2.95638	2.75056	3.4487	6.30721	5.15986	7.24398	4.89957	7.36346
ADRA1D	0	0	0	0	0	0.362434	0.222224	0.347702	0.317506	0.0826319	0.550318	0.284435	0.446364	0.206082	0.139275	0.149647	0.074194	0.283504	0.0726574	0.0831928
CTNNA2	14.6475	17.8938	15.5378	12.9815	14.3209	7.32214	6.28494	10.4051	9.41682	7.9091	4.13301	4.79264	4.12666	3.88994	3.75539	0.10087	0.500223	0.0955434	0.0979323	0.560824
LRRTM1	0	0	0	0	0	0	0	0	0	0	0.183529	0.331991	0	0.160491	0	0.524209	0.520251	0.827403	0.508673	0.971788
SUCLG1	62.5472	58.2899	71.879	55.3053	60.0374	49.3891	51.0151	58.2255	48.0411	54.4901	53.3318	49.6125	44.3142	48.8132	41.3529	51.0882	55.3673	31.6049	53.4734	45.868
CISD2	78.1346	72.6665	76.7358	79.7758	70.2996	48.3086	51.5601	48.2294	54.498	48.3085	30.5225	32.6974	35.3848	28.2696	26.8058	23.7087	31.6827	20.844	25.4515	28.2665
SLC9B2	7.00388	10.0591	10.212	6.82672	6.63803	1.14386	1.36333	2.20347	2.51637	1.96449	0	0	0.337051	0.36313	0.552034	0.395325	0.392418	0.561547	0.191773	0.219877
BDH2	7.83026	4.95181	8.14217	7.25069	8.0785	4.61362	4.18892	3.95874	3.67425	5.00107	1.39861	1.01195	2.49911	1.22392	1.48828	2.66408	2.64607	1.51346	2.32509	3.26072
TACR3	0.316672	0.637948	0.800272	3.5808	0.82259	0	0	0	0	0.419546	0	0	0	0	0.353859	0	0.377766	0	0.736324	0
CNGA1	0	0	0	0	0	0	0	0	0	0	0	0	0	0	0	0	0	0	0	0
VSIR	0.0898467	0.0902396	0	0.221481	0	0.204838	0.104655	0.0983545	0.22456	0.116882	0.111192	0.301716	0.0902082	0.291545	0.0985101	0.105839	0.209953	0.100248	0.102752	0.235383
ZNF302	218.79	223.67	198.418	220.762	232.547	163.212	144.394	158.491	153.715	141.329	132.918	139.776	136.442	143.478	139.036	100.373	92.0008	82.8177	82.3866	98.8579
CABP2	0	0	0	0	0	0	0	0	0	0	0.266683	0	0	0	0	0	0	0	0	0
SLC43A3	1.12456	0.565104	0	0	0.180145	0	0	0	0	0.550834	0.17464	0	0	0	0	0	0	0	0	0
CTNND1	215.596	224.579	190.495	242.54	234.412	247.334	262.525	257.853	268.303	236.528	181.269	167.369	183.928	198.348	174.903	142.759	136.145	147.2	120.255	132.287
TIMM10	194.867	189.999	165.726	166.497	185.446	162.274	145.445	131.579	163.905	136.44	90.5794	89.6831	108.756	113.147	82.2532	94.5787	91.7246	94.8443	118.312	104.683
UNC93B1	15.845	15.4795	16.6336	12.839	16.1399	4.90605	4.32096	3.58217	3.34677	5.03208	5.7065	4.99482	5.08011	6.11698	4.8945	5.60837	6.95756	6.63911	5.6122	9.16227
RTN4RL2	0.29431	0	0.243991	0.121001	0	0	0.114305	0	0.12268	0.255415	0.121487	0	0.0985668	0.106187	0	0	0.11471	0	0.112261	0.128597
ZDHHC5	93.2228	98.9292	75.8087	99.645	101.3	9.0687	10.3706	14.0856	18.3634	11.1582	4.76161	4.37747	3.92544	5.45651	5.80804	9.21225	10.3871	10.4152	8.51276	9.58186
TMX2	66.6674	60.7874	62.7424	57.9128	62.9611	16.71	22.6416	18.6168	25.638	19.4977	11.1811	9.87513	10.8867	10.8086	12.3545	16.0279	15.0305	16.248	13.0058	19.4952
MED19	21.5959	23.4872	16.9251	23.3089	17.3984	2.76148	9.26479	8.03461	5.685	3.18582	4.75809	5.08549	6.33041	7.20025	6.91009	13.6021	16.3967	15.9957	12.3781	13.3079
SLC43A1	1.14694	1.72806	0.831837	1.76793	0.488286	0.217952	0.111353	0.104674	0.597491	0.746373	0	0	0	0	0.104844	0.225285	0	0	0.218705	0
ATP1A4	6.67125	12.2803	9.00661	8.36676	12.0016	4.76724	4.71941	7.00358	5.46546	7.89752	3.87806	2.26539	4.12853	3.81222	2.86264	2.22995	2.36373	1.5296	2.16537	1.62444
POLD4	3.56598	1.20155	3.06664	0	3.15474	6.2149	7.0459	6.08871	2.32272	4.83337	6.88389	4.14988	1.86988	4.03069	2.04022	5.10785	4.36615	8.282	7.05279	6.50711
SSRP1	0.737673	1.48242	1.07215	1.97545	1.88818	2.38549	1.72047	1.61912	1.54055	3.36764	1.67793	0.96577	1.98058	0.933516	1.35171	0.435645	1.00857	0.550129	0.845645	0.484508
P2RX3	0	0	0	0	0	0	0	0	0	0	0	0	0.116218	0	0	0	0	0	0	0
TNKS1BP1	0.160105	0.321897	0.199996	0.198505	0	0	0	0.176206	0	0	0	0.180174	0.161709	0	0.176571	0.189673	0	0	0	0.210984
TMEM187	0.965179	2.92276	1.85199	1.84509	0.634854	1.11667	2.2795	2.1781	2.49128	1.94428	3.07816	1.11344	1.00233	1.08019	1.64077	2.93505	4.67737	2.22157	4.54356	3.92385
NDUFS8	137.036	119.058	128.268	131.13	126.405	62.1749	60.3286	60.6178	57.0866	71.7553	61.1225	70.636	65.7039	68.6311	67.6253	69.0986	70.6929	68.2045	68.9893	75.5846
STX3	2.74199	1.96978	2.45294	1.94851	3.27662	2.24152	2.28976	3.67442	1.72809	0.770887	2.44358	2.87309	1.7858	1.0689	1.29987	0	0.462117	1.54241	0.902838	0.258887
KDM2A	32.5243	35.5493	28.0438	30.9065	31.7416	43.2803	42.5521	39.4103	43.909	46.5508	52.647	53.9735	54.5355	57.2739	49.1575	52.3091	51.202	54.2788	46.3533	54.5861
TCIRG1	0	0.110271	0.273221	0	0.280676	0	0	0	0	0.143019	0	0	0.110391	0.118926	0.361638	0.129508	0.128479	0.36798	0.251419	0.144024
TMEM109	73.6446	62.5215	76.4995	74.3086	68.3064	31.2276	34.4696	37.5271	39.7412	30.8405	24.49	30.2598	26.3463	32.3134	31.5159	38.4447	46.0425	37.9508	34.3979	34.0104
VPS37C	20.047	21.3401	19.32	23.0101	18.7202	3.28951	3.82828	3.50867	4.60606	3.43981	3.96664	4.57443	4.74625	4.50647	4.04108	10.5714	7.20793	10.1921	8.24782	7.97645
DNAJA1	40.3776	44.538	39.8335	41.7807	42.8647	63.2395	64.2556	66.3626	70.8428	63.6593	69.0082	73.6397	73.5663	82.0529	63.4962	95.6006	100.746	96.6392	79.5619	97.5754
RPS6	63.7618	78.0177	84.9797	75.9819	78.5978	500.896	485.308	471.822	445.821	480.881	682.194	714.626	667.656	636.258	694.591	972.359	899.873	630.469	1037.73	891.964
C20orf27	0	0	0	0	0	0	0	0.294448	0.336422	0	0	0	0	0	0	0.634205	0.945294	1.20083	0.307393	1.76453
DDX39A	464.536	473.095	469.627	434.36	443.439	716.15	703.961	697.049	731.206	729.259	920.348	910.008	931.572	880.945	826.108	792.964	762.856	526.337	772.033	765.131
EVI5L	7.85327	12.1321	7.8033	9.72479	9.88144	0.996761	0.339453	1.59877	1.27793	0.380068	0.722985	0.653913	1.46705	0.632215	0.480576	0.34417	0.512345	0.325941	0	0.382813
EMP1	0.0818039	0.0821533	0	0.201519	0	0	0	0	0	0	0	0.0915136	0	0.0884215	0	0	0	0	0	0
F8A2	93.9353	95.7262	108.367	98.0823	100.684	10.7867	9.34691	15.8143	17.7089	13.1652	8.93944	12.289	10.4609	9.70603	10.7855	9.19755	12.1884	9.35203	15.1875	10.9953
GRIN2B	2.16603	1.52567	1.0351	2.00532	1.30476	0.475574	0.883685	0.78728	0.709364	0.492317	0.187376	0.0423708	0.113961	0.0409217	0.0829729	0.0891574	0.0883842	0.12669	0.129893	0.0495592
SEPTIN3	0	0	0.190537	0	0	0.174381	1.42525	1.0072	0.958461	1.79583	0	0.686592	1.84856	0.331928	1.00924	2.52968	0.717344	1.02671	0.701314	0.200986
SERHL2	22.2736	27.6597	26.9212	27.2123	22.6781	1.32988	1.35851	2.13708	3.17314	1.77847	0.966424	1.31111	1.37329	1.05684	1.07101	1.38046	0.456898	0.653585	0.892679	0.511934
TRAPPC5	65.8324	64.4041	59.5692	69.7779	62.2474	23.0558	21.0687	21.9982	22.7882	26.1597	24.5385	26.0917	25.5954	24.9655	21.4719	31.5876	33.2708	35.2876	34.2951	35.1539
MCOLN1	41.3559	35.4261	32.1917	39.1494	35.8349	18.4894	24.3991	21.8582	23.1963	23.0689	10.2634	10.7829	9.66948	11.2445	11.8186	10.1439	10.3566	11.317	7.95316	10.3596
PRR36	63.7261	65.5822	53.6364	55.5361	59.1795	96.1934	100.388	97.2297	102.683	90.707	62.0672	62.748	68.4763	74.608	61.4418	39.3965	37.8291	44.5695	34.2315	41.343
PKN1	2.50768	3.32294	2.67253	2.27965	2.93651	0.685039	0.641733	0.602115	0.937142	1.23575	0.433175	0.559727	0.652431	0.810972	1.09619	2.4146	3.15302	3.2357	2.059	2.75
MAP2K7	148.294	165.429	143.402	172.624	152.382	29.2435	30.2115	40.818	45.1391	28.9708	8.55953	9.76066	10.586	11.7323	8.58465	3.90009	7.40098	8.05525	6.1849	2.7625
PNPLA6	8.98796	10.6709	5.99117	7.89977	8.70784	3.99801	4.88174	4.97773	4.54505	3.54866	2.86998	2.79952	2.92078	2.99896	1.94379	0.803319	1.11498	1.42049	0.832196	1.30988
LIPT1	7.91055	12.2566	13.8273	16.038	13.4228	1.39853	1.07114	1.01572	1.54765	1.20806	0.382777	1.38472	1.86668	1.67613	1.3585	4.01157	4.71293	3.10699	5.30103	2.43564
EIF5B	178.793	181.606	139.908	168.838	178.623	72.3689	68.3915	71.2095	77.0502	75.3145	77.2114	80.5176	75.2615	66.2928	61.1628	79.0066	75.7918	94.4882	63.2708	78.7213
ARHGEF7	34.0771	36.8099	30.1778	29.1092	34.8902	9.98464	8.31721	11.571	9.87747	10.53	10.7243	10.7659	12.5254	12.5667	11.5897	13.6857	12.1285	11.9001	12.7415	13.8466
SOX1	0	0	0.270884	0	0	0.24736	0	0	0	0	0	0	0	0.472289	0	0.514033	0.255258	0	0.747759	0.857905
ATP11A	0.0962524	0.257607	0.0397078	0.0787101	0.16313	0.255463	0.335677	0.559502	0.718364	0.332377	0.830192	1.1085	0.641135	1.17413	1.0153	1.39195	1.97647	1.74629	1.24239	2.2584
TUBGCP3	95.4795	103.163	97.2849	99.3058	100.636	13.7754	12.5831	15.1339	23.6841	13.8162	8.72459	11.1708	11.3067	11.1905	12.8492	14.1286	16.4742	13.5865	12.6693	14.8715
MCF2L	21.9585	25.3316	21.6964	24.8361	23.6449	0.647598	0.413606	0.699131	0.798048	0.646157	0.0878205	0.397166	0.356179	0.306965	0.233382	0.250756	0.165777	0.0791744	0.162322	0.0929382
CAB39L	148.891	140.264	146.882	145.567	153.678	39.5687	38.9046	46.0386	55.2923	44.0564	25.2804	23.5993	24.3522	24.9352	26.1133	23.9365	22.725	25.4744	22.3603	27.0489
CDADC1	3.16306	2.34956	2.91563	3.23351	3.52402	0.785243	0.802276	1.05766	0.345052	0.718356	0.51245	0.154498	0.554546	0.14936	0.9083	1.13838	1.61381	1.38614	0.631278	1.44703
RCBTB1	31.2531	32.6261	36.7844	31.833	31.7511	3.38405	3.45748	4.58713	4.73085	3.51753	2.67659	2.5722	2.44383	2.34031	2.52029	3.18527	4.10903	3.01665	3.40033	3.897
ARL11	0	0	0	0	0	0.455252	0	0	0	0.260978	0.248174	0.673374	0.403051	0.43425	1.10016	0.709009	1.64274	0.671358	0.687693	1.05175
EBPL	18.1375	19.603	22.5637	19.1784	20.3714	0.997322	0.509046	1.94136	2.21994	0.577534	0	0.496221	0.892972	0	0.974594	0	0	0.494982	0	0
KPNA3	3.546	2.9223	3.05121	3.58648	2.08953	55.6601	57.2986	46.0875	53.0677	54.4147	74.9475	76.8479	83.7196	90.3882	86.7383	115.578	120.375	144.171	100.144	119.47
SPRYD7	5.29175	5.06036	3.33046	4.30245	5.81881	9.71515	10.8525	7.63196	11.4029	9.07572	11.9469	12.9059	13.7513	11.3304	15.0125	20.864	24.1872	22.4459	13.177	23.5714
AGPAT3	21.727	22.9395	20.4623	20.2873	18.7177	13.895	13.0403	13.2615	13.5846	8.80833	9.99495	9.87493	9.16695	11.2861	8.9895	11.2688	10.8836	11.4368	10.7295	11.1461
PDXK	9.29905	10.7382	11.7127	10.9557	11.3298	3.45325	4.48864	7.28722	3.12238	4.69412	6.17894	2.79414	4.74183	2.40433	3.04508	0.654016	3.24969	0	1.26789	1.09183
TMPRSS3	0.513604	0.258472	0	0	0	0	0	0	0.325304	0	0	0.582262	0	0.563566	0.285515	0.613248	0.304658	0	0.297257	0
PKNOX1	0.885628	1.27029	0.54927	0.700173	0.805977	0.360196	0.147235	0	0.552194	0.0821203	0.0781302	0.282675	0.253485	0.136537	0.207619	0.29744	0.516139	0.704372	0.649869	0.578742
ATP5PF	2.00302	1.51031	1.8775	0.621213	1.07169	0.190826	0	0.1838	0.209901	0.218488	0.207793	0	0.168689	0	0	0.197854	0	0.187364	0.383917	1.32054
ITSN1	17.5939	20.2838	14.168	20.3407	18.6292	6.50684	6.9936	8.06755	8.83972	8.30772	3.28339	4.01479	5.81881	4.72786	3.93132	6.65459	6.71239	7.67416	4.38343	6.62645
HLA-A	14.2906	12.508	13.2386	13.3496	12.7384	5.38197	6.67643	5.92463	3.59444	5.2821	2.09313	1.13588	1.86917	3.11224	1.66985	1.19582	1.78056	2.26482	2.12698	2.66044
CRYZL1	7.08224	5.88091	5.38262	7.24999	5.72768	1.2315	0	0.33873	0.773617	0.201319	0.382947	0.692719	0.310847	0.334895	0.678836	1.64074	1.08564	1.03587	1.41514	0.811127
SETD4	187.962	173.046	200.409	193.402	188.141	9.40554	7.20616	7.21179	13.1787	8.08358	9.55091	10.1131	8.51145	9.57775	9.49979	11.3131	12.5538	10.7127	11.8349	14.3132
HLA-A	0.33886	0	0	0	0	0	0	0.186601	0.213102	0	0.21096	0.190803	0	0.184515	0.187	0.200872	0	0.19022	0	0.22345
HLA-A	4.00079	3.05662	2.99855	2.18254	4.10774	4.57264	5.04525	5.63597	5.83272	5.02458	5.97344	5.22262	5.33393	8.01042	7.76552	9.10009	6.20987	8.61776	7.54182	8.43543
CBR1	16.4603	14.1713	13.4472	16.7002	15.2549	5.89806	6.90336	6.48891	8.70123	6.48736	2.67818	1.89577	1.60601	2.74791	2.37278	1.4409	0.879523	0.629895	0.322807	1.10928
MORC4	0	0.122928	0.152406	0	0	37.5609	32.6706	42.5599	33.8774	34.3074	9.25878	8.51161	9.73065	10.8813	9.95309	2.02294	1.57704	2.18962	1.26219	0.964212
BCL9	115.816	122.713	92.9744	116.281	120.219	47.5006	60.4317	56.5935	70.002	49.7854	55.0342	45.9492	57.3371	65.6068	55.3996	57.5483	65.3569	65.6739	47.7617	64.8309
GJA5	0	0	0	0	0	0	0	0	0	0	0	0	0	0	0	0	0	0	0	0
GJA8	0.151753	0	0	0.188017	0	0.17339	0.177144	0	0.381191	0.198396	0.566084	0.170667	0	0.165014	0.167244	0.179658	0	0.170139	0	0
FSTL1	0	0	0	0	0	0.592236	0	0	0.327023	0	0	0.292668	0	0.283274	0.574049	0	0.306272	0.583655	0	0.343035
LRRC58	1.79117	0.901887	0.376706	0.37449	0	0	0.700519	1.66029	0.379455	0.394926	0	0.339519	0.610219	0	0.666147	1.7883	3.55524	4.74003	2.77287	3.18484
STN1	41.2731	54.4277	48.3231	47.3648	48.3114	3.89608	2.14264	4.34591	5.9584	3.78985	2.29286	1.48121	4.79028	2.29394	3.48644	4.36819	5.27046	5.90787	6.35188	4.51406
SH3PXD2A	0.0518829	0.104169	0.128606	0.191237	0.0660469	0	0	0.0566326	0.129279	0	0	0	0.0519251	0.0559372	0	0.0609318	0	0.0577192	0.0591739	0.0677437
NEURL1	0	0	0	0.116099	0	0.214707	0.219391	0	0.117712	0.122536	0.233138	0.632611	0.567443	0.305655	0.516384	0.110959	0.44024	0.210193	0.107719	0.246775
CFAP58	0	0.228306	0.282905	0	0.290627	0	0.264914	0	0	0.148092	0	0	0	0	0	0	0	0	0	0
SORCS3	3.51984	3.35322	2.31837	4.14312	3.81141	0.635804	0.433005	1.22566	0.933224	1.21423	0	0.417751	0	0.808096	0	0	0.436679	0.208244	0.213328	0
PPBP	0	0	0	0	0	0	0	0	0	0	0	0	0	0	0	0	0	0	0	0
DEPP1	0.413923	0	0	0	0	0	0	0	0	0	0	0	0	0.460453	0.466361	0.500634	0	0	0	0
CALY	11.0022	12.9106	12.2553	14.4518	13.6425	11.4292	12.8662	11.0241	11.307	15.2464	4.57834	4.37087	9.50138	4.8959	6.089	7.26676	7.93773	7.56885	4.46373	7.54587
GSK3B	0	0.28199	0	0.350803	0	4.50196	6.56819	5.28871	4.97664	5.17964	2.46201	6.04376	6.85935	8.00674	6.86424	1.00518	4.6619	2.22036	1.29903	3.35624
TAF5	113.417	120.743	112.673	118.6	121.385	43.2769	44.0554	47.3681	48.2304	52.3566	36.8378	36.4036	45.5388	39.0699	41.2619	64.9468	51.5596	59.9706	60.8215	53.9965
PDCD11	62.8317	70.2752	60.6064	62.3264	64.1848	96.1544	98.8267	96.3466	90.4456	96.4403	106.598	122.794	108.044	114.953	111.22	114.795	110.147	93.5336	99.073	113.99
CALHM1	0	0	0	0	0	0.535707	0.546813	0	0.597063	0	0	0	0	0	0	0	0	0	0	0
ITPRIP	0.349898	0.175904	0.218776	0.868722	0.899144	0	0.204385	0	0.220143	0	0	0	0	0	0	0	0	0	0.201311	0
SLK	1.57316	2.16437	1.58942	2.22038	1.18731	20.7643	20.4059	14.2531	21.0621	18.5993	31.6513	35.2002	37.515	40.3511	39.313	62.7797	60.6869	73.4766	43.3471	69.1152
TSGA10	2.86992	3.70824	3.40845	3.88945	1.92594	0.936359	0.637782	0.900826	1.0286	0.713808	0.169736	0.460561	0.68879	1.48413	0.601697	1.13117	0.64143	0.612163	0.470464	0.539196
KIAA1210	2.45091	3.18009	2.41355	2.77197	2.74033	0.349393	0.833018	0.671373	0.255492	0.26596	0	0.343254	0.410554	0.442296	0.224164	2.40833	2.86683	3.99183	2.57165	3.74947
LEF1	116.305	115.337	99.8392	118.367	97.2042	33.046	40.5758	30.8043	41.8563	39.5943	65.8686	69.9807	67.3939	74.5349	69.2628	77.559	78.2965	94.9087	69.8865	78.7516
HADH	41.9625	43.0245	35.0936	37.4792	34.0441	37.9756	32.3723	42.2036	42.6042	45.7179	38.236	30.1476	41.4207	43.485	37.6833	23.3475	22.2708	19.4514	22.6335	20.4399
CYP2U1	4.05558	3.40027	3.39349	2.8089	3.48722	0.258148	0	0.498417	0	0.888921	0	0.50963	0.228836	0.246555	0.749521	0.536668	0.533049	0.254066	0	0
SGMS2	11.9927	13.1224	9.04324	10.0723	12.2379	0.806781	1.03024	0.777361	1.55364	1.8482	0.659127	0	0.356754	0.960904	0.389531	0	0.207691	0	0	0.232732
GSTCD	33.6016	37.5691	36.4986	42.63	40.7271	13.2715	13.0692	21.2313	23.7161	18.2867	5.04404	5.66338	7.34075	10.9503	6.47419	1.65594	2.46496	2.19556	1.92836	2.21018
NPNT	0	0.0610561	0.150838	0.149546	0	0.0692468	0	0.0664248	0	0.078929	0.0750947	0.135846	0.0609079	0.0656147	0.0665164	0	0	0	0	0
TBCK	24.4038	28.9985	24.3992	27.6842	25.5158	15.2624	19.0142	22.5232	20.8664	18.6617	8.73024	9.60715	8.85541	10.8122	6.96236	3.87841	5.63445	5.6411	4.43666	4.77545
AIMP1	109.645	123.472	125.888	117.515	114.39	133.589	141.194	152.271	159.321	159.952	178.575	152.591	153.194	153.443	144.42	133.845	146.902	138.661	153.381	125.386
DKK2	0	0.586654	0.734789	1.46081	0	0.669181	0.341697	0	0	0	0.36612	0	0	0	0	0	0.346689	0	0	0.388229
PAPSS1	53.9753	67.0709	52.4738	61.6387	59.7685	29.6731	34.9082	33.4182	37.1734	32.9315	26.231	29.3904	29.8736	33.3832	28.4551	27.3983	28.3041	24.1812	22.6055	24.6712
PKD2	2.30721	2.31788	2.73481	3.79803	2.66896	9.14941	12.9344	15.659	15.1273	13.3134	11.1665	9.73031	13.149	12.3801	6.63635	7.38896	8.10191	5.77052	3.90071	5.47814
PPM1K	3.44226	6.57097	5.42864	5.38539	5.57684	9.03347	8.82871	7.92824	9.19553	9.1235	9.67447	10.0371	11.4292	12.6861	10.5895	13.1373	14.5117	14.6232	10.5167	13.4053
HERC3	23.8034	25.8945	21.0039	24.4877	20.0622	1.57679	1.72625	3.89504	4.32319	2.57163	0.978543	0.885076	0.793933	1.28297	1.6256	2.21223	0.923964	1.32336	1.01726	1.42426
FAM13A	0	0	0	0	0	72.9522	76.0951	79.3021	71.3001	77.0249	75.8116	82.9275	82.2209	91.9078	85.9604	69.5061	71.8269	75.7931	51.044	70.1701
GPRIN3	0.125555	0	0.156444	0.155216	0	0.716574	0	0	0	0	0.155807	0.140923	0.126441	0.13622	0.13807	0.148328	0.147174	0	0.143959	0
MDH1	135.609	139.169	141.346	143.983	126.697	117.804	122.861	112.732	126.213	118.484	146.823	117.523	135.327	133.826	137.528	86.4775	91.1947	59.46	90.4867	82.6333
UGP2	0.210501	0.846982	0.263918	0.524199	0	0.482091	1.23111	0.232564	1.59388	1.65901	0.262924	0.475595	0.640575	0.920222	0.932518	1.50238	1.49201	0.474183	0.242844	0.835785
SPAST	108.859	109.737	108.667	101.709	106.68	36.9822	36.3363	36.2853	46.688	41.1063	51.0365	42.8508	48.619	52.0436	48.991	38.1408	40.2216	31.7784	33.4496	34.2664
DPY30	188.11	147.754	219.273	158.324	145.146	304.592	308.887	288.267	276.432	339.394	282.529	330.442	302.934	307.037	283.236	339.68	304.37	262.83	358.97	292.665
PSEN2	27.1984	23.1814	31.7508	31.5311	28.0799	20.2064	24.7687	20.6399	22.2658	26.4476	22.2972	17.587	19.7919	18.8287	24.1379	22.4691	23.049	26.1851	24.6656	24.9992
SRD5A2	0	0	0	0	0	0	0	0	0	0	0	0	0	0	0	0	0	0	0	0
JAG2	0.589008	0.913845	0.398235	0.263194	0.749901	3.41353	3.61299	1.87058	2.6021	3.26451	2.44515	1.6139	1.9295	1.27025	1.34626	3.14468	2.93083	3.45548	2.25989	2.86694
ESF1	20.8304	17.6616	17.2011	17.389	20.6722	47.1164	50.8729	46.8896	34.9308	44.0071	62.5455	76.4507	56.0058	59.0656	52.133	80.6235	73.13	107.395	62.268	75.9794
NDUFAF5	15.8471	10.3108	13.7801	14.5347	14.5942	4.17742	5.81682	7.36257	5.89036	5.69245	4.9943	5.26954	2.70678	2.55206	2.58537	1.98285	1.57734	1.12612	1.53684	0.882963
KIF16B	13.033	12.826	11.7644	14.184	13.3245	3.5628	5.25255	4.53647	4.41074	4.85788	5.57179	4.06612	4.98097	4.09352	4.93499	6.44753	6.57172	6.56425	4.85709	5.96244
MAST1	1.188	1.54374	0.953963	1.46182	1.42529	0.159202	0.0813435	0.229151	0.348761	0.363063	0.0863536	0.0781065	0.0700452	0.150917	0.076494	0	0	0	0	0
ATG4D	16.2461	15.3046	12.6798	14.4785	18.4515	3.43771	3.06251	3.13049	4.24958	3.61948	1.81737	2.24941	2.56053	4.17945	2.7115	3.18643	3.16008	2.32834	2.56347	2.42954
ACTR2	29.8503	29.7477	33.8696	32.1895	32.863	43.9965	45.2227	48.4251	49.0519	48.1172	41.1995	44.9542	44.4846	42.7795	46.0969	47.2162	50.2639	51.6304	46.9672	53.3903
ETAA1	56.4293	60.2768	57.2099	61.3519	67.654	13.0014	15.2572	11.5014	15.8379	16.4861	18.7393	20.062	22.5062	20.9029	19.1515	25.6706	26.3819	24.4828	23.1419	28.7565
PPP3R1	34.9569	36.0601	33.5094	32.4301	31.8821	49.5876	49.8916	44.0625	48.1528	45.8033	46.526	43.717	51.5021	53.3292	43.1254	48.3635	54.9796	45.2106	46.3286	49.7865
CNRIP1	0.830262	0.278625	0.348672	0.346534	0	0.953113	0.648933	0.307322	0.702302	1.09643	0.347444	1.25692	1.41163	1.21681	1.84928	2.97886	3.61825	3.44674	2.88736	3.31537
APLF	18.241	21.2412	16.1364	21.4312	17.8229	1.08164	1.65608	4.21705	3.61728	4.39148	1.7879	0.538942	0	0.522765	0	0	0	0	0	2.53198
SNRPB2	477.055	414.422	474.74	415.812	396.256	559.576	503.096	574.774	534.102	496.074	433.623	417.486	446.913	464.968	399.051	252.298	259.061	233.987	288.921	260.337
RNASEH2A	77.5842	88.5541	82.9637	80.5719	87.2482	59.0881	49.6295	66.6991	55.3284	67.2485	63.1582	52.6195	59.1114	51.6248	53.3209	69.6555	73.2317	77.6748	76.6882	73.881
PRDX2	259.166	270.77	279.53	244.292	249.151	118.559	112.425	125.753	114.086	113.303	67.4806	74.0695	61.601	70.4457	66.7772	81.0151	75.7385	52.0415	80.8142	59.6021
JUNB	0.74892	0	0.313886	1.55932	0.322578	0.858856	0.584803	1.38318	0.316046	1.64474	0	0	0.254075	0	0.277385	0	0.591932	0.282039	0.288816	0.331508
DAND5	0	0	0	0	0	0	0	0.342237	0	0	0.386919	0	0	0	0	0	0	0	1.07166	0.820689
NFIX	0.789384	1.05767	0.984019	1.30182	1.01093	0.450625	0.153469	0.433439	0.164969	0.171724	0.163339	0.147735	0.132561	0.285626	0.14475	0	0	0	0	0
RAD23A	12.5535	11.7961	8.43636	6.98737	11.9222	24.0202	21.5876	19.8292	23.0114	30.9509	32.2258	32.313	36.1489	32.816	33.5594	39.7091	47.4228	43.2782	36.548	43.824
GET3	67.4664	74.189	69.5061	67.8652	72.5929	63.4227	63.8081	61.9901	70.1775	66.2471	40.9855	39.4317	45.48	44.6026	42.9872	30.6377	31.5707	31.2862	27.0673	33.9647
BEST2	0	0	0	0	0	0	0	0	0	0.398416	0	0	0	0	0	0	0	0	0	0
RAB3D	52.1943	63.0355	49.5286	61.8882	61.3561	49.2704	51.0968	51.501	60.1422	47.0551	23.6276	27.8551	34.6449	31.0477	24.7127	12.0611	11.9937	10.6552	12.0742	7.60882
PLD6	22.2626	19.4571	23.1433	19.9039	16.2417	1.80351	3.68434	3.73078	3.69353	3.84441	0.562375	1.27157	0.913542	1.72249	0.997394	0.267806	0.531998	0.760699	0	0
CNN1	0	0	0	0	0	0	0	0	0	0	0	0	0	0	0	0	0	0	0	0
HS3ST6	0	0	0	0	0	0.457266	0	0.888847	0	0.52877	1.50736	0.908786	0.817429	0.440429	0.4461	0.957811	0.953097	0	0.927415	1.06663
CCDC86	254.517	264.763	246.911	248.888	275.785	186.419	179.068	184.781	188.382	179.352	212.249	202.156	219.427	184.101	177.604	222.149	242.673	337.268	244.15	251.298
GLB1	4.8629	3.89041	3.78801	4.77173	5.04788	0.845361	1.15178	1.62317	0.823519	1.17876	1.63114	0.553256	1.32323	0.890943	1.26439	1.74662	2.40592	2.57351	1.69579	2.37375
CLDND1	34.7305	36.223	31.2612	38.7421	34.32	19.0329	23.1803	20.4841	22.0535	19.0356	18.8992	15.4079	23.3473	22.3599	19.8262	26.1111	32.2257	23.2833	18.6849	30.7443
ACY3	0.438089	0.220057	0.136308	0.135214	0.280055	15.1177	12.8936	10.3262	11.9265	14.9837	25.6559	18.9079	23.2408	16.7314	20.9285	22.872	20.1265	22.5195	22.5777	19.5439
ACY3	6.63396	12.4154	10.838	8.92865	11.61	2.31889	2.15352	3.25093	5.10523	2.41545	2.98619	1.66206	2.9841	0.602822	1.22184	1.53115	2.17168	1.86416	2.75843	1.2167
TACR3	0.187865	0	0.116774	0	0	0.107093	0.109429	0.205718	0.117425	0	0.23257	0	0.283029	0.101636	0.206049	0.332064	0.329374	0.10484	0.429826	0.615432
ABCA1	0	0.140918	0.130351	0.129197	0.13388	0.399301	0.693739	0.650508	0.829762	0.500105	0.562373	0.469544	0.947144	1.24705	0.957779	3.21103	4.73382	3.23686	2.75896	3.20361
SLC44A1	132.724	146.952	127.1	141.697	146.49	121.744	147.075	143.635	144.024	144.914	113.27	116.394	134.128	130.188	113.217	92.6201	104.698	80.5034	78.9668	102.821
APTX	8.98237	9.04164	13.9664	10.9047	6.15158	13.641	19.5046	15.8265	17.4128	21.2601	33.4659	29.9673	27.1909	32.4881	34.6811	54.9199	45.1631	39.145	55.6865	38.6393
OSBP	28.8961	40.6544	33.6823	42.0677	41.6622	21.3314	26.3413	24.8013	31.5215	28.0745	16.5228	12.9819	17.8796	17.5113	14.3469	10.8046	13.5596	12.9413	10.4856	14.3145
PATL1	319.349	298.784	271.797	320.059	300.709	243.57	260.785	257.155	253.893	239.196	163.828	183.136	157.224	181.718	174.027	103.088	96.4118	86.9353	96.1677	98.0253
SMARCA5	246.36	265.923	237.563	274.049	264.248	262.321	311.779	315.933	319.388	307.915	320.419	341.436	333.92	350.27	297.798	319.135	296.225	287.569	262.352	308.773
INPP4B	0.497941	0.166692	0.515444	0.408924	0.105894	0	0.19329	0.363206	0.103654	0.215807	0.410613	0.185698	0.333104	0.0897129	0.363763	0.97708	1.06596	0.925487	0.948642	1.6297
IL15	0.281213	0.28313	0	0.35225	0	0	0.329745	0	0	0	0	0	0	0	0	0	0.668738	0.955502	0	0.748908
ZNF330	38.6431	43.4677	35.9708	38.338	37.6394	28.2517	27.4183	29.9437	26.6474	32.5913	29.6759	39.1671	32.4813	29.9956	35.6604	45.4216	37.1959	51.3372	36.7543	44.2418
RNF150	9.5127	6.80466	7.15645	11.3189	9.26036	1.45245	0.494549	0.467132	0.266792	0.555387	0.79217	0.477644	0.64334	1.15524	0.702406	0.502951	0.499486	0	0.243889	0.279797
TBC1D9	58.3393	64.7759	46.56	63.2168	58.0764	12.4054	17.4558	18.9433	24.9695	15.4333	8.05857	9.28583	9.22446	10.3235	7.1394	5.56903	5.94052	3.28436	3.87647	6.19269
COMMD1	9.98407	8.07882	6.26181	11.6271	7.83343	5.96641	6.85625	6.23778	4.11076	5.13446	7.59455	5.64219	5.28687	5.93353	5.05068	11.8826	8.2097	12.2294	7.76588	7.76026
UCP3	0.229183	0	0	0	0	0.261494	0.133592	0.125678	0.14349	0	0	0	0.115294	0.248418	0.125899	0.270513	0.268379	0.384311	0.131285	0
ELMOD2	13.3779	12.5806	10.5673	14.2922	12.2198	3.40604	3.94044	3.38995	4.22106	4.24774	2.43881	3.08827	2.88223	3.53112	3.57968	7.0958	8.61367	13.0035	5.92481	9.36387
B3GNT2	0.0615743	0.123643	0.152736	0.0757143	0	0.070116	0.143305	0	0.23032	0	0.0760395	0.0687777	0.0616747	0	0.0673537	0	0.143519	0	0.140552	0.0804639
USP34	9.54844	11.649	9.02064	10.7619	10.7232	6.83175	7.29579	7.87056	8.94056	6.68568	6.90204	6.99514	7.51866	7.99053	8.06406	8.30911	9.57026	7.68399	8.03218	9.01733
FAM161A	0.120401	0	0	0	0	1.37406	0.561574	0.924762	1.35752	0.628053	0.448059	0	0.484795	0.261142	0.794076	2.13271	0.987472	1.34659	0.965992	1.42314
CCT4	32.0179	53.404	38.3648	46.2587	42.4932	213.513	206.248	216.225	222.146	210.87	362.582	359.133	358.111	346.531	351.832	448.566	463.957	309.272	449.522	473.024
PUS10	21.9009	24.9911	24.3422	23.7329	24.1177	18.485	21.3207	20.6817	20.5576	17.9838	29.4432	29.9587	24.6069	34.0856	24.9486	26.3866	28.6503	32.6004	29.7987	26.1427
IFNGR1	1.23836	2.07603	1.29345	1.28448	0.797464	1.18153	1.93108	0.683865	0.520752	0.542034	1.80399	1.16543	1.67429	2.48036	1.37101	2.45429	3.65588	3.71825	2.38035	1.36531
LTV1	104.864	116.507	101.627	114.772	116.546	47.5681	52.6783	59.5027	54.3201	52.6503	49.2008	45.4842	44.3632	51.2237	45.5444	64.0547	57.6212	66.1537	46.8578	59.2651
CAPN9	1.66937	1.67771	1.56159	2.23827	2.31736	127.416	127.582	115.561	122.529	120.822	170.565	189.751	175.602	197.194	191.135	228.527	215.352	183.862	185.846	217.762
TAF5L	41.1465	46.8164	48.5666	49.3095	46.3035	17.6492	16.7771	17.1735	17.6251	19.0967	20.6619	18.2053	21.3836	21.4797	21.0643	21.7	22.6121	20.4745	21.4819	22.9029
NUP133	27.6249	29.6525	26.1706	28.5412	28.2855	40.0315	38.1153	39.8778	42.6574	43.1069	58.7932	56.5289	61.8319	66.3964	60.8457	68.5451	73.2421	53.8981	64.9428	71.3874
ACTA2	0.383747	0.385924	0	0	0	0.219561	0.224289	0.211682	0.483543	0.251656	0.47863	0.432894	0.388641	0.418722	0.212168	0	0	0	0	0.253536
CCSAP	1.42638	2.86716	2.84721	2.64883	2.19388	0.325839	0.166451	0.47032	0.179015	0	0	0	0	0.154981	0	0.168742	0	0.159806	0	0.187686
RHOU	9.12992	8.55739	8.32306	10.0735	5.87985	0.712741	1.6988	1.37516	1.04717	2.45242	0.259114	0.468703	0	0.226715	0.689238	0.987055	0.245054	0.467308	0.239327	0
DLL1	0.0912083	0	0	0	0	1.87157	2.54989	1.19826	2.39388	3.32266	8.35379	10.517	8.60906	8.78125	8.40119	23.2101	26.3254	22.3912	21.3855	25.4512
TRIOBP	0	0	0	0.128154	0	0	0	0	0	0	0	0	0	0	0	0.122476	0.242991	0	0	0
SMDT1	11.5499	3.90046	7.04593	7.04437	6.21618	18.0138	19.2892	21.3314	19.3443	25.4187	36.1769	39.9792	30.3488	31.831	41.155	45.0956	39.3097	48.0727	65.7368	47.1018
DCAF15	44.3597	47.6985	49.1286	52.7935	51.3108	31.3887	28.0826	30.4067	32.6813	33.5932	16.7835	18.472	18.7132	20.338	18.4614	11.7447	11.2756	9.11647	12.8896	13.9211
RFX1	17.2238	18.2468	17.5086	19.9751	17.8369	24.4672	20.2181	19.2795	22.0121	21.2333	26.5912	24.7082	27.9451	28.9628	32.962	31.1236	33.0747	31.4426	26.0469	30.6137
NTHL1	47.0189	44.2848	49.6417	49.3229	44.1927	5.19061	2.65073	3.344	3.82043	4.97048	3.46551	2.27946	3.07134	2.48192	0.838274	3.00088	0.894441	2.84111	2.03654	0.667896
TSC2	41.671	40.5751	31.2119	46.5903	42.2363	32.8857	30.6844	31.2916	35.5031	29.2565	18.4631	24.7312	21.4903	20.5649	23.5317	10.4625	10.7063	12.3249	10.7464	11.8562
PKD1	0.775072	1.34971	1.04318	0.894103	1.27408	0.207368	0.132459	0.223456	0.141674	0.176989	0.196483	0.203111	0.386903	0.294203	0.323131	0.373939	0.582432	0.556679	0.492967	0.504764
TEKT4	0	0.166219	0	0	0	0	0.386184	0.182037	0	0	0	0.186136	0.167068	0	0	0	0	0.185566	0.190118	0.217976
GPRC5B	0.0654167	0	0.0811559	0.0804648	0	0.149004	0.152268	0.0714785	0.0815894	0	0	0.0730908	0	0.21183	0.0715795	0	0	0.145703	0	0
KNOP1	10.3539	8.59722	8.42885	10.2239	11.354	26.9162	26.0979	29.0436	26.3815	27.2651	38.6183	32.5664	33.6177	34.0975	31.5821	37.6566	41.9567	49.2871	39.9869	35.7607
EXOSC1	52.3597	70.2084	55.3609	82.5198	64.2339	41.4318	78.9937	63.9943	76.3592	63.5468	53.2604	71.7808	77.1024	87.5353	84.994	80.5965	103.547	111.565	56.4781	92.0626
PGAM1	55.9935	55.133	51.7693	60.5213	53.0045	23.374	27.3633	26.2403	23.8991	25.8057	13.5967	13.0963	11.0357	12.5069	11.7373	7.56526	6.67352	7.16463	7.66767	8.41454
CDC25A	0.76478	0.513157	2.56527	0.318612	0.329542	0.292407	1.1946	1.97826	0.322879	1.00817	2.87553	5.20134	4.41275	6.99199	4.81754	4.86941	6.34999	9.50836	5.90092	5.75761
PI4K2A	59.4619	65.086	54.3798	66.2728	72.5346	49.4346	41.8536	47.0654	49.2034	48.3675	53.0907	53.462	55.8041	55.1685	53.8314	48.5143	59.484	48.0784	41.4283	50.9517
AVPI1	15.5448	18.9765	26.0217	18.1315	20.3334	11.327	10.1182	6.88399	14.1676	14.1976	4.15085	5.6307	8.02	5.91323	4.60706	8.40767	7.87523	11.2327	9.57641	9.36344
ZFYVE27	16.915	14.8872	13.5361	17.0922	17.8566	18.8835	21.4536	16.3961	21.6601	18.843	20.0682	21.4765	25.858	23.438	25.3854	23.334	23.152	24.3094	18.6839	23.1939
GOLGA7B	2.31097	1.54751	1.67615	1.66245	1.22987	23.1658	20.9786	18.6664	22.5139	24.3138	20.2683	23.2929	26.7943	24.3848	23.0276	15.8883	11.3697	23.0032	14.8733	13.1249
CRTAC1	0.17287	0	0.216143	0	0	0.790697	0.807766	0.76176	0.65247	0.226386	0.2153	0.973639	0.699167	0.941587	1.71767	0.410014	0.407025	0.194134	0.397776	0.456108
R3HCC1L	89.6796	92.7275	89.597	98.0077	90.615	94.211	96.4946	98.1968	108.748	96.8507	87.8524	91.2085	80.9923	93.9382	85.9212	56.4987	54.5147	65.2122	52.1785	64.3628
KHSRP	624.98	622.084	566.761	643.234	632.788	723.084	805.35	758.46	757.366	725.354	721.11	647.403	695.447	703.233	704.497	493.824	539.759	476.023	514.209	522.643
SLC25A23	4.18215	3.62354	4.54604	3.23935	3.35613	1.9568	2.59961	1.62656	2.07079	1.70972	2.47539	2.81473	2.92548	3.39872	2.19257	3.43285	4.20464	4.01694	2.68	3.3677
RGS21	0	0.260195	0	0.320208	0.165775	0.443404	0.151011	0.142153	0.162311	0.337913	0.160708	0.290712	0	0.562042	0	0.152997	0	0	0	0
C19orf53	23.1983	20.2697	27.8973	24.8517	23.7271	33.6268	30.1635	31.6522	33.9023	33.6058	31.3113	33.5197	34.5233	34.4006	30.8889	32.8685	26.9119	29.9657	33.3402	28.4494
VPS54	27.586	31.869	25.4403	25.8546	29.8042	6.55803	5.51871	5.55575	8.56198	6.60219	5.23409	7.29064	5.43505	8.87425	6.39898	9.16684	9.78345	8.494	8.51296	7.09092
PELI1	16.4064	18.5791	19.0015	22.9351	20.4108	1.38234	0.605222	1.52199	3.69362	1.13079	0.215084	0.389065	0.349233	0.940641	0.381321	0	0	0	0	0.227825
LGALSL	0.244001	0.612919	0.303951	0.150777	0.468383	1.39239	0.426798	1.07104	1.68144	0.954713	0.90813	0.958276	0.982599	0.926263	0.804729	1.1527	0.428885	1.91051	0.978934	1.28198
AFTPH	54.3493	61.569	50.0013	62.9244	61.8716	8.48708	7.62485	11.3991	12.0513	8.36322	8.90958	9.06576	8.90903	8.06792	7.1905	9.84518	9.16771	8.32003	8.37898	10.2759
RAB1B	41.7544	58.6162	46.6499	59.3162	65.6482	36.0884	34.0013	37.3579	40.2518	40.5965	22.0363	36.5341	25.9112	39.2009	29.3649	27.4317	20.3459	30.9244	18.6354	27.9598
MB	0.262203	0	0	0	0	0.60167	0.307251	0.290838	0.664584	0.345853	0.657613	0.297377	0	0.287844	0	0.31321	0	0	0	0
CENPM	131.292	128.422	143.636	134.556	131.351	109.52	102.873	128.181	111.656	124.533	99.6315	90.0996	97.2029	72.4811	85.9743	68.539	91.342	69.4505	72.6032	81.754
LUC7L2	48.2877	51.3749	36.2749	53.7259	54.0069	79.6721	87.3801	87.0071	78.7494	71.9699	80.3021	78.8133	72.1824	65.3892	66.1735	71.3272	70.2917	79.0011	63.3779	70.0172
MRI1	31.2996	33.1521	38.7223	40.522	39.1854	28.8617	23.6938	27.6127	27.0805	17.965	13.2527	7.72434	16.9848	18.5579	16.7153	8.41505	7.80191	7.43622	7.34355	13.1094
CC2D1A	17.8879	22.5368	18.5817	21.4311	22.1992	7.4125	8.71068	7.73866	8.52937	5.60225	4.42466	5.27545	5.54722	4.482	4.45428	4.69004	4.93622	5.07704	4.46067	6.17295
NANOS3	159.698	171.848	183.25	169.574	170.532	59.7808	46.6266	60.0333	61.2543	38.8239	28.2418	23.0693	37.0414	34.7255	35.5803	24.3094	29.3618	18.8995	28.5909	27.0664
CD22	0.265429	0	0	0.164166	0	0	0	0	0	0	0	0	0	0.144076	0	0	0	0.445719	0.304494	0.17448
CD22	0	0	0	0	0	0	0	0	0	0	0	0	0	0	0	0.21956	0	0	0	0
DNAJB1	323.723	314.217	330.26	342.686	328.117	318.897	310.789	348.916	319.551	302.509	270.153	270.841	302.238	294.56	246.569	181.571	192.639	154.125	153.588	186.704
TECR	66.3412	65.0717	65.5893	64.6213	64.7438	36.798	45.2993	43.9162	38.7262	45.1784	32.1562	32.8059	42.1995	35.1126	35.8103	23.7637	29.4376	25.285	29.7009	24.2588
NDUFB7	22.6948	19.0213	20.9964	20.1218	21.6031	26.4234	33.8883	37.0632	28.8513	38.8453	23.4662	22.7346	23.915	26.5132	26.091	27.9905	42.2952	34.033	39.402	34.7764
PRKACA	35.7808	38.1985	42.0232	44.2846	44.779	35.4571	31.1901	29.3725	35.1113	37.8215	21.9648	19.5535	24.986	29.0358	24.2177	8.89158	13.5623	11.3837	10.8657	11.3548
ASF1A	70.4734	61.7197	61.9555	60.0487	61.806	2.20589	2.25307	2.66347	4.25989	4.75054	9.93688	6.26375	9.29503	7.37939	6.94332	24.3786	20.5142	16.5643	20.3002	24.2555
C3	0	0	0.0907978	0.0900323	0	0	0	0.0799727	0	0	0	0	0	0	0	0	0.0853364	0.0815102	0	0
C3	0	0.0698621	0.0863417	0	0.177375	0	0.080986	0	0.0868059	0.0903656	0	0	0	0	0	0	0	0	0	0
C3	1.35075	1.64187	0.794096	1.57477	1.08757	1.37671	1.07582	0.621705	1.0645	1.0158	0.966421	1.19199	1.92415	1.689	1.01174	1.00344	2.32184	2.297	1.78627	1.5806
DENND1C	0	0	0.152892	0	0.15707	0.140075	0	0.134687	0	0	0	0.137722	0.123567	0.133123	0	0.289915	0	0.137288	0.281382	0.644863
TUBB4A	2.14403	1.91775	0.598569	1.7839	1.23025	0.546157	0.836764	0.791266	0	0.627238	0.298188	0.269688	0	0.521959	0	1.70408	1.12855	0.806708	0.275382	0.31604
C3	0	0	0	0	0	0	0.127948	0	0	0	0	0.061391	0	0	0	0.0645951	0.0640461	0	0.0627299	0
C3	0	0	0	0	0	0	0	0	0.173926	0	0	0.233708	0	0.0752616	0.0762943	0.409872	0.406449	0.155297	0.31839	0.182292
SLC25A10	39.2437	65.7053	37.9782	53.6947	62.5002	19.3211	20.3534	22.5404	33.4555	18.1308	8.95384	2.49133	10.6585	9.67328	7.95776	10.5104	9.82025	13.0498	13.3403	8.05244
MYCBPAP	1.46989	0.781546	1.93376	1.59812	1.21391	0.295651	0.503514	0.283882	0.972211	0.337354	0.213957	0.483805	0.347149	0.186992	0	0.305479	0.302981	0.0964487	0.395439	0.226456
EPN3	0	0	0	0	0	0	0	0	0	0	0	0	0.223399	0	0	0	0	0	0	0
B3GNTL1	7.20004	10.8597	9.68256	9.38897	7.86642	7.00004	8.20263	8.33296	7.02438	4.48133	6.50479	8.9263	7.2845	9.81029	4.97108	8.75706	8.48183	7.48344	8.08077	9.26665
METRNL	4.40425	5.9477	6.17919	4.9393	7.75902	3.14346	3.69339	2.87307	4.14393	1.79732	1.88048	2.9378	2.21995	2.0927	2.27256	4.3944	5.49133	2.92863	1.7374	1.6292
TSPAN1	0	0	0	0	0.648811	0	0	0	0	0	0	0	0	0	0	0	0	0	0	0
FCAMR	0	0	0	0.602025	1.24297	0	0.558106	0	0	0	0	0	0.981125	0.528665	0	0	1.7168	0.543683	0	0
NXNL1	0	0	0	0	0	0	0	0	0	0.240386	0	0	0	0	0	0	0	0	0	0
COLGALT1	0	0.302523	0.374573	0	0.256523	2.63306	2.45651	2.74956	2.26009	2.74482	3.85449	5.17324	6.05293	7.28168	5.83872	18.3453	21.7201	27.6892	11.03	17.1104
CASP1	0	0	0	0	0	0	0	0	0	0	0	0	0	0	0	0	0	0	0	0
SLC27A1	0.341755	0.686708	0.425474	0.703467	0.582785	0.129976	0.132804	0.249868	0	0.296964	0	0	0	0	0	0	0	0.127345	0	0
ADGRE5	0.909003	1.49383	1.02647	1.73047	1.47616	1.13009	1.34725	0.542473	1.0321	0.966967	0.715492	1.20186	1.49253	1.69723	1.99211	1.94578	1.06138	0.460759	0.566746	0.865446
TMED1	57.7673	69.2606	56.531	61.6872	78.003	20.2501	22.512	17.9275	25.4947	21.3294	30.6496	25.4827	32.5701	41.5967	40.3774	37.2223	53.914	31.6595	55.6613	45.6473
DNM2	17.6861	24.0295	21.667	26.1888	27.5868	17.6522	16.4931	18.0539	19.6717	20.2293	9.61879	16.5506	15.4297	12.1087	13.3112	11.3936	9.53788	6.7695	5.6344	9.19587
TRIP10	16.0337	12.8159	12.4002	15.6003	15.2909	4.27715	3.85491	5.34228	5.27032	4.61949	7.13781	5.71077	4.68235	6.00581	5.11217	18.5637	12.7244	14.3586	9.63508	12.5095
SH2D3A	0.188965	0	0.236544	0	0	0.21621	0.220867	0	0.476101	0	0	0.213119	0	0	0.417804	0.897545	0.668365	0.424953	0.870636	0.748893
PIN1	37.8717	44.651	36.2137	43.4895	44.0939	85.2718	76.135	69.1241	63.4292	77.6432	107.643	89.3375	102.117	104.233	108.147	136.439	144.448	168.306	144.137	127.773
MFAP4	0	0	0	0	0	0	0	0	0	0	0	0.218519	0.196184	0	0	0	0	0	0	0
MFAP4	0	0	0	0	0	1.44161	2.94339	3.73928	3.20663	2.22465	4.22753	1.43367	1.71972	0.4633	1.87696	3.52605	1.0027	1.43004	2.43825	5.61004
MFAP4	0	0	0.320182	0	0	0	0	0	0	0.335558	0	0	0.259187	0	0	0	0	0	0	0
MFAP4	0	0.571369	0	0	0	0.656265	0.66967	0	0	0	0	0	0	0	0	0	0	0	1.33913	0.771884
MFAP4	0	0.251241	0	0	0	0	0.292401	0.553271	0	0	0	0	0	0	0	0	0.295966	0	0	0
MFAP4	0	0	0	0	0	0	0	0.406794	0	0	0	0.415925	0.373999	0	0	0	0.435979	0.414825	0	0.488007
MFAP4	0	0	0	0	0	2.62972	2.38743	2.54159	0.967914	1.67904	3.83118	0.866245	1.2969	1.39736	2.26539	1.52056	0.60431	1.72751	3.24309	2.36901
GPR108	83.3664	84.4321	83.3616	82.2269	93.5182	24.8031	29.4634	31.1859	34.1315	29.0382	29.8951	36.738	31.7776	30.826	35.2757	40.8349	40.8265	39.8456	38.4294	40.0837
CAMSAP3	0.204849	0.274251	0.423647	0.756095	0.435156	5.05536	3.73544	3.80596	4.2592	3.9018	7.84614	4.50228	5.88523	6.26634	5.53028	1.76655	2.38878	3.87909	1.5594	1.4285
LPAR2	135.548	171.353	162.144	156.567	168.81	98.4359	97.9995	107.373	120.834	101.63	119.276	111.153	140.309	160.162	139.526	89.1608	105.718	77.6084	77.2461	108.498
AKAP8L	138.146	161.395	135.486	149.533	151.622	321.384	328.839	312.103	318.13	328.983	496.562	453.483	462.248	470.762	510.698	438.669	477.433	433.445	442.716	453.095
EARS2	0.330775	1.33296	1.25517	2.08043	0.860152	0.760987	1.55413	0.737688	0.843118	0.438733	0.834001	0.754254	0.678015	1.09587	0.370058	1.98671	1.58042	1.88051	1.92477	3.0964
ERI2	42.8533	69.0447	58.299	69.1322	81.4135	77.1741	70.6882	59.9722	60.2357	69.3118	60.0538	62.1938	63.4185	67.0653	72.2307	59.0822	58.3233	68.5845	57.6612	65.7901
THUMPD1	21.69	28.2761	25.5772	26.4654	25.2072	52.6744	56.0775	47.8674	45.8728	55.4566	55.1641	71.0468	57.0254	58.9982	53.2721	75.1681	67.7616	81.8664	85.4313	71.4443
GTF3C1	6.41911	8.0971	4.56873	8.67537	8.48729	2.67591	3.55474	3.33915	4.0072	3.15405	2.80705	2.53895	2.43412	2.19932	2.57244	3.68519	2.92379	4.97417	1.96794	3.99524
MVB12A	20.9782	17.2716	18.868	15.7688	20.9287	1.91287	3.90759	4.48696	2.41219	3.76605	4.17754	2.159	3.87824	4.96207	3.70486	4.54739	5.08202	3.49817	6.33819	2.84634
OLFM2	0	0.590098	0.732675	0.545325	0.376372	0.335344	0.513913	0.161372	0.368541	0.383625	0	0.495022	0.296158	0	0	0.347391	0	0.164495	0.168549	0
RDH8	0	0	0	0	0	0	0	0	0.220031	0.229031	0	0	0	0	0	0	0	0	0	0
TXNDC11	29.1312	25.0384	24.73	32.8368	31.9907	14.0343	13.3596	15.9058	12.1061	15.6157	7.03642	7.66074	9.19824	6.94799	8.5436	9.42692	8.85943	8.10624	9.75286	11.311
PARN	431.22	469.433	429.264	464.34	471.304	79.0871	65.3882	66.3139	75.1975	67.5606	52.6864	54.3713	50.6125	49.3919	47.3052	50.8181	47.4923	48.2832	42.6125	52.3151
CYP3A7	0	0.140089	0	0	0	0.159192	0.162644	0.306334	0	0.364109	0.519481	0.313235	0.421622	0	0.306925	0.329717	0.327199	0.936776	0.319967	0
SP6	1.72753	3.13332	1.75	2.17583	1.34922	1.59065	1.21813	1.92856	1.76348	0.458823	1.30821	0	0.354557	0.382051	0.774045	0	0	0	0	0
ITGAL	1.24853	0.895703	1.44077	1.97845	1.13846	0	0	0	0.111442	0.11601	0	0	0	0.0964561	0	0	0	0	0.101986	0.116813
WFIKKN1	0	0	0	0.207776	0	0.191471	0	0	0	0	0.416999	0	0.169263	0.18236	0	0.198527	0	0	0	0
TIPRL	109.268	139.527	137.125	141.675	154.126	65.0101	64.6033	59.4363	57.5582	63.6098	41.5974	47.4607	37.9544	38.6535	40.017	36.8799	41.4882	28.2791	37.5267	41.7203
RIOX2	10.6522	12.5499	16.4325	14.4529	15.6013	17.6957	19.6332	18.3267	21.9757	22.0033	19.6831	19.1142	21.3613	20.6584	24.9772	35.5104	34.6617	24.8471	42.1086	32.6983
HLCS	7.07985	11.161	7.42661	7.61171	10.5849	11.3857	11.4072	13.0878	11.0905	13.5516	10.7392	7.55458	9.68897	11.4828	14.1757	7.95407	13.3131	7.31664	12.7856	11.1245
DYRK1A	42.8672	51.7517	38.7388	58.7842	53.2093	11.3076	13.1658	11.6279	19.6251	17.575	15.5747	15.1209	15.7688	16.2387	18.612	27.8847	26.0454	23.1892	22.1807	25.2627
VPS26C	10.1197	8.33888	13.1647	10.3938	7.16369	17.2691	16.5554	12.9699	17.5522	15.0201	22.3808	24.0798	24.1501	19.9389	25.6784	36.3968	34.7207	24.3612	35.6258	29.8741
TTC3	35.8619	42.722	39.1118	49.5888	49.3448	6.96383	7.33876	5.98485	7.86403	7.7731	10.3064	8.96629	9.50815	10.5179	11.0805	13.553	14.3299	13.9019	15.1965	19.8977
PIGP	6.73951	13.0884	12.634	15.9061	16.4135	10.811	12.8722	13.4919	12.0793	20.25	8.6217	11.395	11.8815	9.89471	14.7336	13.282	22.0573	20.9423	33.0339	20.4379
RIPPLY3	3.96363	9.64027	9.34267	13.4958	18.1652	0.928091	0	0	3.15065	3.27742	0	0	1.69235	1.82435	0	2.96916	0.989249	1.8711	0.954843	1.10436
KCNJ6	0.480025	0.40172	0.298074	0.394112	0.510303	0.182331	0.465791	0.437572	0.299702	0.311989	0.0989373	0.089488	0.0802593	0	0	0	0	0	0.0914313	0.104711
KCNJ15	0	0.994043	0	0	0	0.378316	0	0	0	0	0	0	0	0	0	0	0	0	0.382726	0
ERG	11.9495	11.8696	11.2645	13.4134	12.9972	4.76047	5.02584	7.32836	6.27594	6.71433	2.76165	2.34171	2.80176	1.81108	1.98858	1.31462	0.652288	0.933761	0.956815	0.548317
ETS2	17.1347	20.7075	19.5504	24.1336	21.7709	68.6449	73.3509	82.2991	66.7962	74.6883	64.3563	48.2607	54.8777	65.6183	55.4472	15.9885	13.0555	10.5865	15.1063	13.2181
PSMG1	27.1196	30.3115	32.7162	31.776	36.719	32.8694	29.0214	24.5293	32.1972	36.2697	24.7338	23.7248	24.366	19.3626	27.5967	31.062	37.9744	29.4044	39.0984	25.0367
MPZL1	5.92165	13.3294	12.2119	13.8999	13.1555	20.5321	23.6451	22.567	23.4621	23.8044	23.7742	31.9871	33.0349	40.1774	31.9326	47.5435	56.1474	28.2472	31.0303	49.2653
KLHL35	8.17466	7.68351	6.44591	9.48834	10.9623	4.8779	3.73735	7.83378	4.47335	3.72504	1.10705	1.40178	2.15712	0.581012	2.15902	1.05415	0.418606	0.399291	0.613585	1.17268
LRRC32	0	0	0	0	0	0	0	0	0	0	0	0	0.194104	0	0	0	0.226024	0	0	0
EMSY	32.1622	37.8354	31.1038	50.503	41.6971	24.5581	26.1064	29.6193	32.3649	26.777	21.048	25.9603	21.8311	30.5223	29.5615	26.7515	27.5517	29.2195	22.8756	24.8113
NHLRC3	2.28297	3.9426	3.71148	3.69083	3.81509	0.750192	0.766049	1.09063	0.830985	0.432421	1.23303	1.11513	0.334123	1.08008	0.729459	1.5665	1.947	0	0.758863	2.17984
AKT2	15.2041	16.4568	16.7761	17.5263	18.1314	12.4075	14.0215	12.7449	14.5593	10.3047	4.89897	4.43076	5.38365	5.04394	4.08887	2.74467	2.45368	0.25987	1.59686	2.13784
VASP	0.132412	0	0.165071	0	0.169586	0	0.308927	0.290842	0	0	0.164403	0.446092	0	0.143745	0.437082	0	0	0.148231	0	0
FAM222A	6.72373	8.88887	9.98919	9.32703	10.8656	0.942256	0.825213	0.776438	1.03424	1.0766	0.146298	0.132323	0.237434	0.383692	0.518546	0.139271	0.138177	0	0	0
DACT3	1.97056	1.98242	3.57086	3.5466	2.82263	6.27003	3.58655	4.11496	5.53	3.74135	4.10484	1.98002	6.00093	7.90234	7.52244	2.86688	5.43587	3.45481	1.76923	5.79977
ARVCF	0.490745	0.123274	0.305676	0.303268	0.314028	0.280052	0.143069	0.134639	0	0	0	0	0	0.133075	0.269767	0	0	0.137239	0	0
NPFFR1	3.09905	6.23695	6.28934	5.05791	4.61663	0.273266	0.279113	0	0	0	0	0	0	0	0	0	0	0	0	0
SMAD4	74.6758	79.0558	72.5477	85.603	85.4575	40.5185	41.3974	44.7238	47.0996	39.8688	48.1703	47.8944	44.7796	49.438	46.4747	55.618	59.5495	48.669	46.3989	49.7415
RFX3	11.3659	16.2029	9.39106	13.7319	14.3872	2.71609	2.62088	3.19314	3.97743	2.07014	0.984531	0.742065	1.3317	3.15633	2.47206	5.31136	4.03032	3.9946	3.79017	6.42858
GLIS3	0	0	0.124497	0	0	0	0	0	0	0	0	0	0	0	0	0	0	0	0	0
UNC5C	19.6836	25.8811	21.948	26.4453	26.4661	3.45427	3.91912	1.86049	2.97699	3.54087	1.26204	1.52182	0.342007	1.4741	0.746662	0.400852	0.797217	1.13827	0	0.892514
BMPR1B	10.2856	9.21678	7.25467	14.4379	11.9334	2.63425	2.68951	3.83803	2.9251	5.07352	2.89277	2.18008	1.17638	0.422549	0.856015	2.75701	3.6573	2.60927	1.77992	2.55833
PDLIM5	32.6019	34.1288	31.5058	35.7597	36.7396	16.2577	17.0101	18.5024	16.4143	16.7895	12.2961	10.6102	10.0923	11.4905	11.3964	4.30539	5.33924	4.58742	6.66026	4.78809
GDNF	0	0	0	0	0	0	0	0	0	0	0	0	0	0	0.183478	0.19709	0	0	0.191218	0.21924
NUP155	61.5003	72.2216	58.6962	78.7757	70.0126	57.2226	65.8862	69.6697	67.3924	67.2479	61.8175	63.1081	64.9403	63.9153	61.6521	44.3534	47.6552	39.6745	42.2682	49.5905
SGSM1	0	0.071825	0.088778	0.176056	0.0911907	0	0.083265	0	0	0	0	0	0.0717057	0.154495	0.0783071	0.168273	0	0.0796964	0	0
TRIAP1	45.7688	55.0559	55.0674	48.9666	43.9768	30.5327	29.1906	37.2465	30.7285	38.1485	23.4536	36.6355	29.0568	35.5182	30.2933	39.1245	32.3672	30.7731	35.9075	49.7993
SRSF9	154.997	169.923	181.626	175.115	191.209	304.737	285.308	300.902	281.327	301.433	309.918	311.09	289.43	309.641	313.186	216.523	238.992	210.397	250.97	233.601
GAL3ST1	0	0	0	0	0	0	0.330014	0	0	0	0	0.319665	0	0	0	0	0	0	0	0
EPB41L4A	5.39819	4.10158	5.08797	5.6998	7.0819	2.7058	2.76454	3.03639	1.48585	1.8904	1.96156	2.66126	2.12259	1.57214	1.01403	1.24497	1.08094	0.884306	0.302059	1.0385
APC	77.9222	83.5393	62.0515	79.9135	80.5576	27.0429	29.4708	28.7285	38.6756	28.5527	23.7541	27.5327	29.5288	30.6089	26.6222	27.9748	31.1318	28.0395	23.7525	27.3884
C3AR1	0	0	0	0	0	0	0	0	0.496457	0	0	0.443997	0.39933	0	0	0	0	0	0	0
CNTNAP4	2.54057	3.24706	2.58093	2.65407	2.94568	0.526305	0.717085	0.926144	0.768879	0.700353	0.285553	0.0860936	0.231639	0.166362	0.0843205	0	0.0898468	0	0.175928	0.201473
MFSD14B	8.29615	10.2836	11.5959	11.7536	13.4045	3.53253	4.73627	4.47025	3.16067	5.31444	2.88789	1.0883	1.36789	1.47376	1.28016	1.14586	0	0.434012	0.444588	0.25496
SPIN1	36.8335	42.9453	36.6918	41.1024	43.1945	10.0341	10.8691	8.52575	16.1232	6.64254	6.64745	7.51503	11.0722	9.60211	8.25496	10.7648	7.55059	14.3876	6.44526	7.75187
NXNL2	44.3292	52.2484	49.8065	59.6256	42.0067	13.1806	12.4199	10.3644	5.64386	10.5716	6.69588	7.56912	4.54063	12.7222	5.45116	6.38332	3.70699	8.05368	4.11894	6.51749
SPINT4	0	0.735791	1.38861	0	0.475845	10.0902	7.72676	9.79455	11.6628	13.594	9.22782	6.67626	5.25292	8.89486	10.2388	5.71619	3.93654	7.07478	3.83284	4.40628
SETD9	3.06462	3.97499	1.11635	3.89058	2.29577	0	0	2.46132	0.562919	0.585787	0.556543	1.0066	1.35864	0.97608	1.97708	1.06112	2.11275	0.502049	1.02707	0
MIER3	21.4712	27.5895	22.1849	28.6257	30.2532	38.9342	40.7186	41.2242	43.0187	33.3729	35.7577	41.4258	46.4761	46.3824	35.256	34.4291	36.0726	32.2419	28.7652	35.9572
ASH2L	163.552	162.56	145.439	162.455	162.903	55.5055	53.6851	60.8013	60.2497	53.3578	57.7551	57.7178	66.2474	61.9334	55.7212	72.2972	93.7643	82.2966	79.5985	91.4469
AEBP1	0	0	0.0901332	0	0	0.413613	0.676261	0.238162	0.18124	0.0943359	0.179498	0.324711	0.291205	0.235284	0.159007	0.51253	0.508266	0.404567	0.248828	0.284942
YKT6	154.02	162.749	171.977	142.219	160.115	52.3137	47.6793	58.0327	57.7124	44.975	37.1978	28.8743	37.1146	42.5521	34.8062	22.8754	29.9282	10.8293	23.804	22.6606
DDX56	59.7743	68.2595	58.4538	58.7332	56.9789	59.4489	68.2992	63.8727	70.8216	58.8526	79.8033	90.7637	79.3786	86.1679	85.0964	89.4358	92.2507	72.0863	83.3663	85.2788
CCAR2	35.7017	38.8877	38.8422	40.103	41.2328	28.3443	30.3079	36.2441	26.6226	28.918	24.499	22.5476	23.2514	26.1766	23.8667	20.7307	24.3561	20.4094	19.7247	22.7518
ERAP1	1.76164	1.76921	1.25052	1.8602	1.71274	1.33846	0.683853	0.367159	0.628697	0.872626	0.726394	0.750875	0.420914	0.54414	0.735448	0.0987717	0.293884	0.46778	0.287689	0.21966
OCLN	377.707	401.299	394.263	415.183	381.785	316.319	361.094	373.836	361.939	383.305	254.572	285.523	263.803	285.722	253.515	105.321	120.215	83.6299	108.34	106.22
MARVELD2	77.8334	81.3307	79.2488	80.6343	84.0042	8.30308	8.95454	11.5373	11.6536	9.84524	4.18055	6.80611	5.70005	4.6788	4.89042	9.23368	10.2686	6.18173	8.96101	12.5718
ANKRD34B	0	0	0	0	0	0	0	0	0	0	0	0	0	0	0	0	0	0	0	0
CKMT2	0	0	0.463368	0	0	0	0.429719	0	0.467015	0	0.923776	0	0	0	0	0.440181	0	0	0	0
RASGRF2	0	0.288918	0.11887	0.0589176	0.183139	0.0545955	0	0	0.0597442	0.0621955	0.0591768	0.107051	0.0959841	0.1034	0	0.0563175	0	0.320093	0	0.313062
HIC2	108.676	95.7295	87.4107	111.317	93.2766	51.1588	47.4348	55.8331	55.8515	43.3075	26.8602	34.2136	37.6185	40.5297	34.5264	40.2836	32.7983	38.1464	18.1955	28.2161
PI4KA	20.0692	24.1079	18.6054	22.8177	23.2747	6.40884	8.11693	9.76845	10.3701	7.23864	3.44365	3.38332	3.61136	4.56473	3.62846	2.99474	3.41724	3.1045	1.70116	2.88974
SLC25A1	0	0.304022	0	0.378809	0	15.9565	18.0662	14.4427	27.6355	14.7806	24.6824	27.1305	30.2456	33.5874	19.2041	29.666	38.8403	31.1648	16.1272	36.6455
TOR4A	4.55228	2.39882	3.53482	2.97061	4.75001	23.3392	36.0137	44.5678	28.1915	43.018	35.4868	21.3153	28.821	24.8893	15.8535	12.6416	15.1175	10.7483	15.0118	22.9643
BRAP	18.2699	24.9542	23.4889	20.9638	16.3846	4.53295	5.63751	5.88592	5.63775	4.06271	4.29307	6.60088	4.35666	4.13053	5.3278	11.8547	11.3624	12.0002	10.3112	9.77684
NAA25	138.338	142.96	135.191	146.429	147.58	38.8147	39.476	44.1154	51.0614	38.4302	31.5932	33.608	34.8166	36.379	30.5403	39.9999	39.0138	40.396	37.7348	42.9003
DDX55	27.7032	27.6844	20.1087	26.3391	26.1986	22.1879	22.0861	21.1874	30.8708	27.3571	34.0713	32.6836	30.0061	31.0636	35.143	38.9298	42.5466	34.073	33.7642	40.6804
TMED2	487.257	506.313	487.494	505.832	507.928	428.762	455.344	460.982	419.909	451.275	309.149	305.068	320.389	322.282	298.862	255.286	244.509	248.821	240.014	260.484
PTPN11	130.014	126.023	109.972	127.59	123.388	117.246	146.056	140.732	156.487	133.699	105.264	95.8327	105.424	119.292	109.532	64.2485	72.7226	70.3757	62.7977	71.3232
RPH3A	0.116104	0.0582822	0.143962	0.071362	0.0739343	0.52877	0.472817	0.253584	0.361805	0.225988	0.286682	1.29652	0.465034	0.56359	1.14268	0.204631	0.946859	0.839969	0.397434	0.682544
PLA2G3	0	0	0	0	0.207797	0	0	0	0	0	0	0	0.163534	0	0.178563	0	0	0.181644	0	0
PITPNB	56.3963	59.6829	59.6699	58.2517	56.884	7.161	6.21854	8.44588	16.1402	5.53193	8.37918	9.34108	10.1235	8.35045	8.6359	12.9875	15.6529	17.9218	11.8815	15.272
MN1	0.481902	0.322634	0.398996	0.395664	0.512311	0.549138	0	0.175718	0.50147	0.313217	1.58923	2.60536	1.45036	1.38885	1.75984	12.0066	15.1893	13.1637	12.4836	14.6122
IFI44L	0	0	0	0	0	0	0	0	0	0	0	0	0	0	0	0	0	0	0	0
PLK2	0.977693	0.842219	0.696844	1.2101	0.178979	0.478536	0.488913	0.306953	0	0	0	0.156934	0	0.151718	0	0	0.163931	0	0	0
PLPPR1	86.991	80.604	75.3618	70.2309	84.9992	31.8895	40.4062	38.5967	36.7873	32.5383	22.4245	16.9903	12.827	18.6083	20.4592	0.57787	2.30209	2.18703	0.559138	1.28754
PALM2AKAP2	0	0	0	0	0	0	0	0	0	0	0	0	0	0	0	0	0.318071	0	0	0
PALM2AKAP2	0	0	0	0	0	0.118573	0.12118	0.0757513	0.172908	0.135004	0.171277	0.232382	0.277778	0.598474	0.303369	0.651967	0.727078	1.08084	0.633248	0.996596
SLC46A2	0	0	0	0	0	22.9977	15.3902	15.5697	16.6199	20.3336	12.4082	11.4833	18.2822	14.6472	16.8893	10.7186	8.18997	6.50548	8.52804	10.092
SNX30	118.958	139.187	126.182	123.42	140.718	99.0788	106.679	122.734	110.492	107.163	78.5891	66.4393	75.1716	85.6816	69.6721	55.0727	57.3252	58.6686	54.0687	60.527
LYRM7	16.4805	11.4055	14.4436	14.9872	17.3286	13.0688	16.1185	6.36981	10.9279	9.47623	10.8024	8.14065	6.35045	9.47586	7.46355	20.027	16.5256	12.9936	18.2713	17.8483
HNRNPD	25.2629	28.7295	23.8488	21.2638	26.7559	171.242	181.744	171.332	173.645	174.371	222.546	242.501	203.543	218.661	185.914	203.847	199.885	267.786	167.272	204.698
HNRNPDL	194.173	204.317	171.139	175.655	181.219	288.097	315.708	296.556	303.549	287.256	353.982	330.261	347.833	350.883	344.282	345.031	379.513	314.748	373.28	358.273
ENOPH1	47.8238	46.3304	40.3358	44.1774	42.1999	34.6262	34.0023	37.9115	38.3805	31.2426	18.995	18.5014	22.3452	21.5182	20.5111	19.0163	17.961	17.5675	18.8951	15.9963
TMEM150C	0	0	0	0	0	0	0	0.236329	0	0.280981	0.267181	0	0	0	0	0	0	0	0	0
SEC31A	18.1835	17.3642	14.1151	20.996	19.6773	27.289	30.0595	30.2823	32.3382	32.1866	35.2389	38.4114	40.2329	46.0626	37.1767	55.7105	51.8401	59.286	39.5237	52.9154
CDC42SE2	0	0	0	0	0	0	0	0	0.242042	0	0.718747	1.08344	0.194538	0.209595	0	2.73778	3.62449	0.64811	3.09823	3.29965
SPTLC1	76.7458	77.9954	72.353	70.37	73.6963	26.7028	27.8643	28.2915	31.0503	24.2404	24.3	26.1109	23.7736	26.8846	27.6151	33.2233	32.5865	32.96	27.8205	39.1571
ROR2	88.653	96.3631	82.7824	101.868	91.4348	51.9336	49.777	55.4612	60.695	51.8027	63.9408	68.9515	69.349	76.0898	71.0353	85.1217	89.9659	77.9817	75.3438	87.6127
NFIL3	19.0232	24.0122	23.3358	19.3089	18.2334	8.6636	10.2116	12.2089	12.232	11.2042	15.982	17.74	12.7808	13.77	13.9546	23.2902	20.378	15.7215	21.2489	19.2409
AUH	14.3791	17.4134	18.3782	16.4327	22.3493	16.4862	16.5533	14.847	16.6533	19.5802	13.123	11.5927	11.9001	11.4861	13.5333	6.39512	6.35323	4.12825	7.04597	8.41033
SYK	0	0	0	0	0	0	0	0	0	0	0	0	0	0	0	0	0	0	0	0
ST8SIA4	0.132513	0	0	0	0	0.151297	0.309162	0.436597	0	0.345951	0.164529	0.744057	0	0.143855	0.583224	0.783181	1.39886	0.593381	0.608053	0.522637
PAM	61.588	58.671	56.2978	62.5856	64.7172	3.31937	4.38948	3.93705	5.24346	4.12164	1.48364	1.8212	1.71944	1.85235	2.15935	2.32002	2.90129	3.63065	1.66485	2.69195
IL6ST	8.51601	9.86646	9.55036	9.25854	8.46171	3.80867	3.39963	4.39029	4.74704	4.33783	2.82125	2.64635	3.09291	3.10366	2.08221	3.82842	4.43617	3.76796	3.91142	4.31151
ANKRD55	7.71851	8.99999	6.36082	10.139	4.75287	0.352795	0.901075	1.52838	0.969619	0.403719	0	0.520934	0.155841	0	0.510495	0.182795	0.181427	0.346217	0	0.203327
MAP3K1	51.2186	51.3637	44.7307	51.1844	50.254	15.7377	16.8168	19.3534	23.0195	15.6285	7.0099	5.31574	9.59059	10.7029	7.58878	3.03248	3.80859	4.59609	3.66471	3.44651
HMGCS1	187.268	186.413	162.822	190.074	186.348	12.7726	14.9152	16.248	33.8971	17.7819	12.8186	15.2995	13.8322	13.3999	14.0509	25.5367	20.9653	23.1144	19.6598	20.005
TLN1	14.5329	15.6031	10.6278	14.758	15.1892	10.2716	11.8624	9.00647	13.8568	13.796	7.18728	7.44902	7.4475	8.19729	6.98424	5.31984	6.45104	4.22959	4.70553	5.70304
TPM1	29.069	30.3497	26.4491	27.3635	28.6395	19.5394	21.9365	21.3618	22.1768	21.0872	14.9274	14.3617	16.1196	16.867	14.7397	11.312	11.3979	12.3435	9.66534	12.075
CA9	0	0	0	0	0.222429	78.7572	68.096	56.265	75.117	57.2305	122.043	136.228	137.318	128.428	149.287	150.646	155.929	244.166	125.533	167.857
DCP2	28.9107	31.012	27.4414	28.0383	27.9869	47.0751	43.9438	46.5767	57.8589	53.6753	63.9116	64.3492	72.7651	68.0243	67.3385	60.0878	71.6092	56.1779	72.0395	78.5468
REEP5	108.099	107.588	113.687	89.7892	103.36	33.2264	26.6856	32.2013	37.6293	32.2768	13.9077	11.838	11.6384	12.1824	8.3487	7.40535	8.52579	8.48536	13.9721	13.8843
CHD1	120.47	126.858	95.5481	125.33	120.361	51.2935	56.3338	52.4272	65.9742	46.0404	51.267	55.8415	57.1936	57.6173	50.6832	60.9876	58.9325	71.714	48.9966	64.1122
MACIR	0	1.72537	2.93109	2.19241	3.01507	0.660638	0	1.29312	2.95941	0	1.462	0.66102	0.595548	1.92559	3.24914	2.78916	7.64699	5.27654	2.02235	6.21737
PPIP5K2	12.7066	13.0642	9.8493	11.3424	13.6964	4.45201	3.90978	4.80444	4.11295	3.8852	1.43332	1.29644	1.77441	1.64787	1.73734	2.51289	2.70527	1.29219	2.09161	1.83602
DDX4	238.871	225.361	203.401	223.464	223.423	188.786	196.736	186.709	181.364	179.848	148.071	156.58	150.846	137.446	128.424	64.7837	59.8168	53.5441	48.4659	57.2074
SLC38A9	30.7838	32.9387	30.5065	32.8991	30.2191	4.29641	5.2529	5.22655	6.89022	4.5486	3.91142	3.68841	3.44267	5.16313	5.30772	6.6534	7.54022	5.70212	4.99928	6.78127
SH2D4A	3.75711	7.15965	3.71536	4.91897	5.34474	2.94225	2.54316	2.40081	1.24643	2.59476	0.74024	0.446335	0.40073	0.647622	1.31259	0.234976	0.233324	0.444997	0	0.261423
PSD3	6.85964	6.72	7.20085	7.75061	6.33961	0.62979	1.35156	0.905995	1.24092	0.645914	1.09253	1.66758	1.27375	1.84946	1.02817	1.88459	3.22169	2.46236	2.71369	2.67333
FUT10	3.50379	2.3492	2.19391	3.63068	2.75527	4.45535	3.641	5.58471	5.64264	5.36259	7.2851	6.14968	7.09865	7.43565	6.02825	6.93748	9.41426	8.5399	4.0375	9.00455
NRG1	17.9247	15.0454	16.9995	20.0598	16.136	6.21795	5.84948	5.59137	7.14024	6.86982	8.78539	10.4658	8.95248	8.23997	10.251	9.58603	10.7214	12.0741	9.20773	7.03068
WRN	13.7286	12.7418	14.0614	14.3214	16.2893	1.35633	1.80794	2.26193	2.38809	2.35168	0.767147	1.32995	1.1925	1.84318	1.18908	1.15598	2.35256	2.4206	0.768115	1.894
PURG	2.10409	1.51354	1.51743	0.377136	1.16976	0	0	0	0	0	0.378056	0	0	0	0	0.720369	0	0.340961	0	0
TEX15	1.12907	2.85219	0.726597	1.44921	2.24221	0.655181	0	1.2822	0.733587	0	0	0	0.590493	0	0	2.07416	2.06778	2.61597	1.33687	2.31172
PPP2CB	246.675	260.879	248.924	253.9	262.763	370.151	380.098	353.499	359.823	368.391	546.882	584.883	500.403	511.736	518.19	610.682	597.926	626.741	599.073	595.944
UBXN8	24.3015	23.8277	28.2654	19.1456	25.6856	5.58943	5.70762	9.02808	10.7307	10.3089	6.12407	3.69234	2.98702	4.64908	3.98524	4.27914	8.12269	4.78694	3.76908	6.06278
HINT1	51.6704	55.0295	75.9532	56.7341	52.5217	60.6532	48.4395	50.0683	64.2664	51.329	64.5347	57.3242	40.6967	32.9054	48.4172	43.2591	58.4189	44.9713	68.8176	41.0442
PCYOX1	24.5365	22.5541	21.7478	20.5446	25.0729	1.93779	4.20623	4.44049	5.33912	2.22292	5.28439	3.8235	3.86242	3.00548	3.98275	6.03913	6.24744	3.81216	3.41655	1.39985
FAM136A	14.1507	11.8077	14.0045	17.6203	18.0481	44.5224	75.0338	63.5079	65.8384	68.4489	57.7976	96.5725	86.2138	71.2885	81.4185	105.625	92.7255	91.7763	109.458	105.046
GMCL1	107.335	105.321	101.607	118.281	104.216	20.3749	20.1957	20.1841	24.7167	19.1226	21.8266	23.4804	22.5451	28.0478	20.9548	21.0944	21.8693	20.5742	17.5691	20.1349
GGCX	31.7957	28.3465	25.4365	29.4124	28.3526	27.007	35.2062	29.5555	26.7741	33.6498	22.4192	25.3474	29.9051	28.7313	30.3656	20.3136	18.9265	21.9617	16.3351	23.5009
SNX24	23.7518	21.1932	20.0526	19.5903	20.2597	2.16835	1.26545	2.69604	1.02681	2.49365	0	0.918883	0	0.592997	1.20166	0.967845	1.28236	1.22169	0.312724	1.07714
LOX	0	0	0	0	0	0	0	0	0	0	0	0	0	0	0	0	0	0	0	0
EPX	0	0.095977	0	0	0	0	0	0.209291	0	0	0	0	0	0	0	0	0	0.106661	0	0
SFTPB	0.810346	1.35959	0.680284	1.35212	0.699163	0.620012	0	0	0.342541	0.713036	0	0	0	0	0	0	0	0	0	0
MAT2A	520.785	517.369	470.09	512.01	472.051	277.334	276.777	258.259	293.611	236.964	336.719	322.917	317.003	318.75	317.677	332.273	327.758	309.017	307.239	328.182
INPP5J	1.67933	1.35356	0.849982	1.6907	0.873734	0	0	0	0	0	0	0	0	0.371079	0	0	0	0	0	0.44935
SLC35E4	0.326499	1.31293	1.22383	1.61966	1.88611	0.186606	0.19064	0.898549	0.205226	0.427245	0.609505	0.183757	0.494789	0.355381	0.540259	1.16069	1.15211	0.915965	1.12614	1.5063
EWSR1	10.9982	11.7793	9.1831	11.0522	11.5991	189.656	180.955	182.215	188.513	179.211	265.671	285.313	270.705	273.026	297.064	340.691	376.826	354.57	337.595	392.074
ATP6V0A2	0.201008	0	0.125003	0	0.12841	0.114613	0	0.11011	0.125707	0	0	0	0	0.108808	0.110292	0.118494	0.117542	0.112232	0.115029	0.263542
NFKBIL1	9.07725	8.27143	8.14326	8.99948	10.9941	2.45385	2.07133	2.35682	4.21131	2.80083	4.17043	3.98166	3.28951	3.64507	3.18169	4.74159	5.35941	5.22219	4.71022	6.37628
SUB1	234.378	216.332	250.627	213.773	185.415	307.205	368.888	320.142	271.865	396.658	304.843	304.967	259.118	300.969	272.427	305.553	320.887	428.969	377.862	358.665
PSTPIP2	0.246393	0.164964	0.510076	0.202331	0.104791	0.28079	0.573851	0.359423	1.43604	0.533896	1.72693	0.826937	1.56575	2.30822	2.33982	3.96428	4.02758	5.67824	2.44079	3.54798
NDUFA9	95.7448	94.9731	84.9369	82.4275	66.725	31.9878	34.7666	40.2015	32.7523	38.9453	25.4222	23.6848	27.6229	31.8018	22.6042	20.5785	23.4549	16.6831	19.1789	21.3008
DHX29	33.6559	40.6907	30.9462	37.7315	38.1457	13.7775	15.6957	20.2868	17.2411	15.0805	9.49719	10.235	10.491	13.686	13.4258	12.9824	11.2542	10.293	11.3909	9.83772
MTREX	194.283	216.413	194.711	210.577	212.151	95.9041	96.4309	116.68	106.619	106.016	104.301	108.443	102.569	107.482	105.437	86.1442	94.7482	77.7881	79.4888	90.6558
PLPP1	15.9637	11.5287	14.7084	13.4454	15.5093	11.1577	13.3895	6.64975	8.56717	9.52578	12.5296	16.2142	13.926	15.3405	23.407	27.5301	32.607	31.6332	30.2742	30.2142
CSGALNACT1	0	0.077022	0	0	0	0.0873889	0	0.0838786	0	0	0.189653	0.25731	0	0.082868	0.168007	1.08307	1.25312	0.769425	0.438169	0.501789
HVCN1	54.9096	62.4787	72.7606	54.6808	55.9214	23.5408	20.278	20.0048	25.0461	23.7876	9.29443	9.24665	8.05393	6.50829	5.22075	2.0657	3.81131	2.23513	4.86384	3.61229
TCTN1	8.24434	7.4426	11.6624	7.63368	4.63018	1.9366	1.73092	3.26993	2.13433	3.05463	2.90462	2.1494	3.43114	4.62097	3.51203	5.28099	5.74409	4.28604	3.90223	5.59595
PPTC7	29.2868	28.2546	25.3041	32.8991	30.4107	25.511	24.2424	25.0511	29.4125	20.4077	27.1578	32.9823	25.5428	37.0366	33.7355	30.6802	24.9881	23.7936	17.1931	24.6876
TBC1D10A	7.52709	10.3636	6.95147	7.50871	9.66301	1.87046	1.91089	2.16163	2.87999	0.856519	1.2219	0.552579	2.81047	1.06868	1.80514	3.10251	1.92475	2.75442	1.50508	2.58836
RABGAP1	39.0377	41.5967	30.3401	36.9651	44.5901	1.45911	3.1949	2.70249	2.62809	1.78422	2.26314	3.27517	2.47869	1.7802	2.80705	5.60089	4.38019	4.99896	4.60095	4.19205
GOLPH3	186.574	213.762	194.688	233.684	195.187	51.696	75.5244	75.2137	95.6685	70.6587	57.5613	59.1557	59.9201	66.859	54.1831	54.8513	60.337	57.0303	55.5497	61.5304
ITGA1	0	0	0	0	0	0.935033	0.382216	0.239125	0.341171	0.568266	0.405504	0.489039	0.712574	0.826684	0.47889	0.192961	0.127547	0.243715	0.312316	0.143024
ITGA2	3.61287	1.5636	1.32377	1.31937	2.04222	0.597893	0.610194	0	0	0	0	0	0.537566	0	0	0	0	0	0	0
ITGA2	6.28839	3.61526	3.94613	6.15933	5.50336	5.91813	4.20522	3.97429	2.83746	1.77202	6.17803	4.31768	5.24598	2.21172	3.23728	6.68638	7.70384	8.60997	8.55879	6.84469
ITGA2	0.0705602	0.0708514	0	0.347316	0.0899492	0.160751	0	0	0	0.0916514	0	0.0788683	0	0	0.0772404	0	0	0	0	0
MOCS2	10.2321	12.2456	15.0157	14.0985	11.8835	2.59903	2.2759	1.96657	2.04162	2.97521	0.202116	0.914024	0.984443	1.06061	1.43322	1.34711	0.382042	0.182244	0.186718	0.642207
FST	0	0	0	0	0	0	0.14517	0	0	0	0	0	0.125348	0	0	0.147046	0.291801	0	0.142716	0
ARL15	39.0389	39.2954	34.6221	31.7827	33.8877	9.92003	7.98247	8.42783	11.9533	7.94853	3.28555	5.94298	8.80915	7.76582	6.70284	5.00752	7.15255	7.40746	8.19169	6.61772
SNX18	0.777005	1.40589	1.55243	1.34817	1.79437	0	0.36285	0.170967	0.585705	0.609673	0.773138	0	0.941373	0.338067	0.171316	0.368061	0.913278	0.871393	1.78564	1.02351
PRDM8	1.06643	0.536752	0.671279	0	0.689901	0	0	0	0	0	0	0	0	0.292792	0.296662	0.318587	0	0	0	0
ANTXR2	0	0	0	0	0	0	0	0	0.560514	0	0	0	0	0.242722	0.245958	0	0	0	0	0.293933
PAQR3	6.63779	11.3961	7.93354	9.24154	8.50504	11.0547	5.64723	5.16599	7.11324	5.05669	7.04274	7.61283	7.8072	7.66009	8.37279	8.99458	8.11436	5.57565	7.77647	6.36627
ANXA3	12.6914	13.1773	12.0572	14.0113	11.0714	11.2489	11.4907	12.433	12.3937	17.7379	9.20031	14.7931	10.9995	8.94413	8.1574	1.2169	1.9335	2.07407	2.36052	1.35391
SLC17A2	0	1.6705	0	0.706618	0.728942	0.639338	0	0	0	0.744387	0	0	0	0	0	0	0	0.637816	0	0
MRRF	23.8625	18.0166	23.2213	13.2356	21.409	5.91322	8.89984	6.3207	8.25363	6.80073	3.4028	2.76976	4.14738	4.17078	3.92401	1.29661	2.25486	1.22751	3.45632	2.52533
RBM18	39.5188	33.3698	33.5633	38.799	34.2809	21.4981	20.8557	24.1783	23.042	22.951	19.4684	25.9679	23.3062	21.1537	26.1454	23.2175	21.9296	23.9375	20.7106	23.9513
LHX6	0	0.112431	0	0.13819	0.143106	0	0	0	0	0	0	0	0.11257	0	0	0	0	0	0	0
MORN5	0	0	0	0	0.268238	0	0.73068	1.38016	0.525491	1.09393	0.260056	0.470408	0.633575	0.227541	1.61408	2.22896	0.737843	0.703512	0.960788	0.5511
NDUFA8	75.071	89.4713	87.4248	72.6326	83.4987	78.2768	74.7692	70.397	58.8312	67.7735	91.3558	107.646	107.667	82.0153	71.3526	108.914	111.839	94.9135	118.727	109.604
RC3H2	1.26427	1.65018	1.41138	1.39933	1.53024	2.01563	1.17702	1.65743	1.26124	0.984726	0.46844	0.847407	0.886552	0.818626	0.622404	0.297223	0.589444	0.281544	0.0721552	0.413086
STRBP	37.8097	43.2207	41.9551	44.631	38.8467	42.8814	44.4611	42.7935	48.8574	39.878	39.4456	39.78	39.3677	32.9202	33.612	14.7844	15.1864	14.4984	13.0808	14.5502
SH2D3C	0.211974	0.319202	0.197054	0.260465	0.134933	0.0603254	0	0.0578496	0.0660288	0	0	0	0	0.17142	0.0579263	0.0622416	0.308557	0.235839	0.241781	0.276801
URM1	66.918	63.999	81.419	61.2155	66.0634	27.5999	27.6622	25.4001	24.0182	33.7129	18.2241	18.4783	9.43677	19.3702	19.1272	23.6905	16.7706	14.9451	24.4597	20.5231
CERCAM	0.614099	0.411789	1.02614	0.254751	0.263605	3.98397	5.50594	4.9732	5.93867	6.45014	9.967	15.2554	9.54673	11.6274	13.3691	28.2321	30.2109	36.8724	32.8112	30.0568
SARDH	29.8067	34.5943	28.188	30.8223	34.2515	9.71945	9.647	12.1488	11.1273	13.011	9.05575	7.37162	10.7781	8.84069	7.08842	6.46569	5.70234	4.08242	5.57818	7.35064
DBH	0.164558	0	0	0	0.211268	0	0	0	0	0	0	0	0	0	0	0.195019	0	0.36936	0	0.650803
FAM163B	0	0	0	0	0	0	0	0	0	0	0	0	0.296022	0	0	0.34702	0	0	0	0
SWI5	19.7074	20.0592	17.2619	16.2893	17.1476	9.1907	9.92403	7.35256	9.84735	6.02915	5.7327	6.99948	8.14864	7.27455	7.87978	7.09798	6.77923	3.8772	9.2653	8.2018
SLC27A4	1.81551	1.21658	2.07754	2.24928	0.970215	6.22299	5.82791	3.3279	4.56025	3.95573	4.13854	5.95501	8.85627	6.74478	6.16901	11.6419	8.88801	8.98969	6.25652	8.5665
AMBP	0	0	0	0	0.225818	0	0.205317	0.193646	0	0	0	0	0	0	0	0.208461	0.206948	0.789615	0.808937	0.695699
NRARP	7.95196	8.09334	7.28978	7.87649	10.5642	61.8171	74.748	51.1417	52.103	71.8174	92.8185	105.644	98.9776	110.03	111.874	188.557	201.617	164.798	174.89	207.767
EXD3	33.6325	41.2463	37.0725	34.5918	37.6077	27.1155	29.5471	33.367	36.1176	32.883	20.7013	16.7476	22.2067	20.9078	18.0348	3.61255	3.04033	3.4217	2.44435	4.13891
CDC37L1	123.841	126.233	109.526	127.862	130.5	13.6797	13.9761	17.1792	18.7001	15.8396	9.25705	10.0144	11.6388	12.6978	9.65221	8.9863	14.0635	12.2745	11.2355	14.0319
AK3	2.32678	1.75503	0.728421	2.41089	1.24745	429.811	353.381	453.358	391.714	391.958	346.37	358.118	415.79	438.662	473.063	338.364	372.107	432.725	306.087	362.09
UGCG	74.865	70.5376	63.4502	80.0911	68.3252	28.5754	22.756	24.5131	26.2966	21.7708	11.7246	12.1196	12.8509	17.439	17.5411	13.3361	15.8208	20.1814	12.2401	17.2501
PTBP3	20.6419	20.5679	16.5945	14.5932	17.0511	17.1179	13.945	16.0842	14.7917	16.8864	13.2246	17.0871	14.1895	19.4195	16.1209	15.7417	17.6391	16.6097	14.6152	15.2611
HSDL2	65.1336	65.4449	63.9983	57.0238	62.1634	50.2987	50.1143	50.2324	52.4722	67.6414	58.2996	70.4895	54.5415	55.5903	49.9215	52.9122	42.2271	37.3124	45.215	39.3377
KIAA1958	17.4721	19.217	17.1142	18.4192	19.2014	0.779102	1.251	1.3899	1.34263	1.14354	2.41742	1.31191	2.3536	1.26778	1.49926	3.45165	4.2227	4.35901	1.89877	3.83834
INIP	209.743	217.855	223.347	220.293	216.597	94.1897	111.464	99.0439	100.396	97.1287	57.4773	73.4746	87.3499	85.4414	87.3387	90.8295	92.6424	101.073	79.4382	102.389
LIN54	26.3728	26.9775	24.233	33.0035	26.5034	26.0911	24.1749	24.3192	27.036	28.1439	32.1758	30.4056	34.2874	32.3209	32.4431	38.3988	35.2549	37.2357	31.6187	35.7108
COPS4	50.5314	60.3098	54.5098	57.6034	57.9451	20.8436	17.2833	19.1666	27.0288	21.0999	23.8087	24.6787	26.5056	24.1102	25.6182	36.687	36.9414	28.2241	41.0152	35.7169
PLAC8	0	0	0	0	0	0	0	0	0	0	0	0	0	0	0	0	0.672084	0	0	0
SREK1IP1	56.8338	54.2112	55.38	58.5685	38.2045	76.2306	73.4401	72.0933	73.6164	89.3667	86.2233	95.6362	73.5106	96.3697	85.0057	60.3884	71.06	69.8914	82.6356	61.5651
CWC27	73.0588	67.9575	71.1499	79.5175	73.3725	33.5483	36.1735	43.5949	35.9342	36.6014	22.6105	25.2751	26.4072	25.3396	18.2453	23.7099	29.0705	35.7377	23.7002	25.8409
ADAMTS6	0	0	0	0	0	0	0	0	0	0	0	0	0	0	0	0	0.0981991	0.0937828	0	0
PPWD1	12.9048	14.9451	18.1208	13.13	13.3358	79.887	71.3198	81.994	84.532	71.8266	114.652	122.009	121.029	118.445	115.275	99.8899	107.489	95.2462	100.945	103.378
TRIM23	88.7827	98.3365	88.3348	106.262	101.203	23.2951	25.0741	34.8118	42.8028	31.3298	11.7522	10.3819	10.2108	12.1971	10.9057	8.0691	8.27265	4.92915	3.78638	3.47542
EPHA5	0.140344	0.282097	0	0.173715	0.359704	0.641143	0.327522	0.154225	0.352207	0	0.174357	0.788498	0.283026	0	0.154523	0.497994	0.329464	0.314416	0.322176	0.369263
LPAR1	1.97887	2.50589	2.56556	2.96834	2.41577	2.15739	3.00615	1.50652	1.82728	1.90219	5.74818	7.22107	5.61316	7.62859	6.41269	12.6651	13.6669	14.9713	10.1321	13.4073
MUSK	0	0.318092	0.0983379	0.0975155	0.101013	0	0.0922046	0.173232	0	0	0.0979213	0	0.0794345	0	0	0	0.2773	0.264846	0.0904926	0
RASSF6	0.483714	0.973535	0.607854	0	0.624672	0.277279	0.283208	0	0	0.318492	0	0.273875	0.49198	0.530082	0	1.15371	0.8596	0.819237	1.95757	0.641915
CST9L	13.4367	16.9403	11.762	14.3706	15.3919	0.484646	0	0.471474	0.539096	0	0	0	0	0	0	1.52433	0	0.961659	0.983766	0.565901
TMEM267	19.435	16.7317	23.0743	18.3473	22.256	8.4085	5.94508	8.13528	10.3683	10.047	7.42865	3.83914	4.59935	4.02653	4.07959	4.71793	7.03337	7.65662	4.24618	6.00117
IL11RA	13.4345	16.0711	15.7858	14.555	16.8726	4.08966	3.73079	4.91643	5.29278	4.50778	2.22327	2.15452	3.73744	1.80498	1.54802	1.36066	2.10016	1.57502	1.46728	1.5133
CNTFR	4.89225	2.91981	2.67224	2.84153	4.11823	1.3975	1.60623	1.51348	2.88048	1.99891	0.95058	0.343905	0.46296	0.665034	0.674019	0.543035	1.25758	1.71421	0.878195	2.61745
GALT	9.36772	8.93015	11.0976	9.8134	9.53629	5.16903	6.41239	7.11095	7.71452	5.91696	5.22547	4.54443	3.75246	7.03094	5.87876	3.0618	3.60895	3.08072	5.19873	4.68301
SIGMAR1	193.594	209.223	195.921	206.376	205.058	113.853	129.031	121.813	133.864	119.745	58.8952	63.275	62.6508	64.7935	57.3821	43.8862	46.1667	43.1357	48.642	45.5725
KATNAL2	3.88071	3.90696	1.74618	4.85936	3.58936	0	0.324987	1.84692	0	1.46428	0.348007	0	0.848357	0.304696	0.308715	0.663044	0	0	0.321338	0.368974
HDHD2	28.3964	27.3422	35.6353	24.5633	26.4944	11.9229	14.1998	10.1532	15.48	16.6844	8.19926	4.44893	3.55819	5.27231	3.398	5.2108	4.66836	4.93089	2.01757	3.48225
IER3IP1	81.3218	71.5329	65.3059	81.2014	76.1699	108.828	120.371	96.8134	97.8471	121.61	72.5232	61.9387	74.9201	67.777	78.1744	64.6819	72.1122	53.9205	64.4155	67.0804
SKOR2	0.392073	0	0	0	0.512183	0	1.38456	1.31784	2.51107	2.61321	2.48318	0.89827	1.61587	0.870624	2.20461	0	0	0	0.458349	0
SMAD2	192.464	192.675	163.733	196.651	192.808	18.7088	17.7592	18.1626	33.8472	17.6172	19.4234	17.8694	19.2696	21.7292	20.2563	26.7287	26.1966	26.9179	21.8466	22.3209
CLDN23	9.18464	4.71685	5.13948	5.10319	4.52656	253.839	267.984	245.842	242.86	239.97	181.145	177.727	205.889	191.111	188.052	123.05	121.26	106.404	125.209	123.983
CLDN23	0	0	0	0	0	5.33363	7.76575	7.69096	6.43942	7.00787	3.76777	4.5875	5.40928	5.82758	5.77843	1.93134	3.8323	2.87445	2.14239	3.37528
SH3BP2	0	0.291849	0.18038	0.089429	0.277923	0.74497	0.338342	1.42987	0.816093	0.660766	0.449028	0.243686	0.291388	0.235431	0.556873	0.170951	0.339057	0.0809642	0	0
VLDLR	201.009	237.6	202.929	206.428	232.665	19.1216	19.6451	23.4536	26.2049	19.3324	8.46222	7.14371	7.87223	8.48079	7.29719	2.14796	2.66312	2.64484	2.39809	2.86623
KCNV2	0	0	0	0	0	0	0	0	0	0	0	0	0	0	0.232559	0	0	0	0	0
PUM3	132.925	133.79	103.712	129.577	129.569	146.21	156.349	159.108	176.622	157.645	178.068	184.868	186.318	164.875	141.981	164.954	167.341	169.802	155.033	172.633
TRAPPC13	159.798	159.352	159.391	159.934	172.685	19.3643	20.4556	24.61	20.8389	21.6908	11.9925	11.0635	9.34828	10.4915	8.50574	10.5066	10.6589	8.00229	10.1913	8.63953
SGTB	20.0214	15.2351	15.7953	17.4732	15.0703	3.30099	2.95066	4.37403	4.76843	2.59989	1.12387	2.23625	2.00744	0.786471	1.9926	0.428069	0.424982	0.608037	0.415266	0.714315
NLN	43.3686	39.8969	39.7808	34.9206	42.3097	2.56068	5.41897	4.05085	4.02256	4.39651	1.19469	1.44072	1.93961	1.39312	0.882446	0.37917	0.564534	0.718147	0	0.843543
ERBIN	64.9223	67.9816	48.0208	65.8165	67.364	28.7364	34.653	32.6065	38.12	31.1455	16.8916	17.4835	20.6676	23.7585	18.7466	17.5803	18.3148	17.5794	13.281	20.63
ZFAND5	677.809	669.107	673.926	643.689	674.697	298.066	289.098	273.249	321.757	287.242	260.705	248.557	246.24	250.923	247.197	159.127	143.915	123.007	146.167	150.14
SMC5	52.8269	54.5068	46.9441	49.8907	48.9129	16.956	13.8609	15.5925	19.0395	13.3696	14.8386	16.2468	16.2019	19.5996	14.3323	22.6199	19.2758	25.7503	18.0424	22.9094
MAMDC4	0	0	0	0	0	0.331559	1.1856	1.11679	0.910889	0.758538	1.80366	1.63135	1.17117	2.68126	2.87739	1.37379	2.72675	3.41519	2.33292	3.62907
APBA1	1.52202	0.509634	0.631053	0.876304	0.388954	0.231434	0.118239	0.222349	0	0.264246	0.251372	0.227361	0.305929	0.109861	0.111359	0.11964	0.356041	0.339952	0.46456	0.66523
TJP2	47.5241	48.082	50.5977	49.4626	55.3643	34.9724	36.9931	29.5529	34.9904	35.4912	44.784	49.1869	47.8592	46.511	45.5747	50.236	56.2755	56.557	43.7692	50.4033
PIP5K1B	0.545371	0	0	0.168706	0.174671	0	0	0	0	0	0	0.153157	0	0	0	0	0	0	0	0
APBB1	22.554	23.772	15.9502	22.124	18.5011	13.8203	12.676	12.5408	14.4922	13.8284	11.4447	10.3514	10.3977	11.3513	10.5968	9.43229	9.03733	9.70299	8.99571	9.58655
ALDH7A1	77.6256	83.1183	75.8928	71.1192	82.115	3.67364	8.44347	6.20028	8.59946	4.21222	5.25726	5.66056	5.2856	4.16154	5.54902	8.58263	10.6532	11.0615	9.01819	10.3445
PHAX	243.684	223.99	203.651	217.22	234.15	14.0034	17.3154	20.6249	36.2865	19.1665	23.5853	24.725	19.3724	19.9341	17.5861	26.0354	24.5894	25.8602	23.764	30.672
LMNB1	319.965	339.108	282.439	336.342	322.899	261.73	253.439	296.517	305.838	261.152	179.477	170.024	201.846	205.273	172.193	146.787	137.796	111.779	132.353	140.483
C5orf63	0	0	0	0	0	1.16762	0.595843	1.13974	0	0.678317	0.644287	1.74789	0	2.26143	1.14495	6.14394	4.89674	4.06886	2.3773	4.10734
MEGF10	0.277915	0.279059	0.0862208	0.256471	0.0885635	0.158281	0.0808729	0.151881	0.173369	0.090239	0.68682	0.388266	0.48747	0.300082	0.532349	0.571983	0.810294	0.774	0.555399	0.363417
PRRC1	186.17	177.983	168.658	180.78	180.411	191.744	223.647	211.086	239.302	207.713	138.807	142.91	156.932	164.54	157.573	91.7629	97.9706	74.9561	77.5093	97.8002
SLC12A2	67.3437	77.8151	63.5956	65.1634	75.8367	18.1511	21.6172	20.0979	29.143	18.6689	9.2713	10.2754	10.7012	14.1539	10.2973	11.9331	9.12496	8.4767	7.72237	10.2293
FBN2	0.112839	0	0.0699483	0.0693457	0	0	0	0	0	0	0	0	0	0	0	0	0	0.062788	0	0
SLC27A6	9.31033	6.65575	5.87882	9.03593	8.35354	10.1592	8.81954	4.05613	6.1079	8.10173	9.65894	11.5603	13.059	14.3241	15.3847	19.9656	19.7087	21.1106	18.3032	20.9613
SLC27A6	50.43	56.4542	52.8714	53.5604	60.5575	17.0425	13.7663	20.2374	16.5708	17.9295	5.18018	4.49	5.60743	8.49563	6.5053	2.87732	3.06039	1.94623	2.39266	3.42943
ISOC1	4.24305	4.26524	4.90657	2.92189	3.02467	3.59185	2.38521	5.01452	6.71365	3.90526	5.66909	4.0666	6.18871	6.15462	5.89116	5.76997	7.38963	6.34551	6.86268	4.55482
MINAR2	0.320157	0	0.404644	0.402365	0	0	0	0.356711	0.815342	0	0	0	0.327825	0.706478	0	0	0.382047	0.727449	0	0.427749
CHSY3	0.360966	0	0.672931	0.111231	0.115209	0.308611	0	0.395159	0.112777	0.234799	0.446737	0.404068	0.543646	0.683284	0.395785	0.956765	0.738093	0.604151	1.23848	0.945703
STOML2	185.104	160.271	160.604	174.428	170.434	33.1614	36.8403	38.1306	38.3318	31.0753	33.5292	31.0453	29.526	27.2699	34.3563	31.5662	32.5182	31.3201	33.1654	41.0659
UNC13B	23.7253	26.5855	21.7095	23.3788	25.8069	7.31495	6.94121	8.59361	9.64572	6.04181	2.18593	2.78269	2.62673	2.90047	2.9403	0.385273	0.993302	0.291957	0.448937	0.428371
ATP8B2	0	0	0	0	0	0	0	0	0.881379	0	0	0	0	0	0	0	0	0	0	0
FAM166B	0	0	0	0.346815	0.717289	0.953877	0.649452	1.23028	2.46005	1.82886	1.3909	0.314484	1.41278	0.304448	1.23386	1.32501	1.646	0.940783	1.60539	0.368674
RNF208	0	0	0.794938	0	0	0	0	0	0	0	0	0	0	0	0	0	0	0	0.731283	0
SLC5A1	0.130433	0.131071	0	0.322627	0	0	0	0	0	0	0.161921	0.146453	0	0	0.286986	0	0	0	0	0
YWHAH	114.641	115.231	112.156	117.636	106.751	55.104	60.1556	65.1031	60.9455	55.3871	39.6027	40.7189	41.5464	43.1269	44.2065	45.8872	43.6003	45.309	43.8359	47.8752
DEPDC5	6.46417	7.16355	6.42863	6.6735	6.21472	3.61092	4.25775	3.26395	3.57351	2.92858	4.36772	4.01872	3.66474	2.89516	4.33571	7.81213	8.95433	5.02389	7.86456	9.6421
RAB36	0	0	0	0	0	0	0	0.357383	0	0	0.808085	0.36541	0.328444	1.41562	0.358534	2.69484	0.765539	1.82205	2.23805	0.857115
SPPL3	142.024	158.222	128.537	156.665	161.324	131.647	147.3	140.276	146.419	131.653	101.092	102.682	109.694	113.573	103.709	86.3479	89.2621	79.0106	71.5088	83.9493
GNAZ	0	0	0	0	0	0	0.245329	0	0	0	0	0	0	0	0	0	0	1.65356	0	0
NT5DC4	0.134556	0.135221	0.335539	0.33294	0	0.921849	1.88371	0.295598	0.675046	0.702684	1.16964	0.906775	1.08488	2.33758	2.8135	4.13601	6.31419	4.67035	4.47702	5.66174
SLC2A3	0	0	0	0	0	0	0	0	0	0	0	0	0	0	0	0	0	0	0	0
SKA1	75.4222	92.0545	83.348	75.9216	87.3588	25.9308	23.7122	30.0253	30.3083	27.0388	37.5703	28.912	34.5418	38.0831	32.4481	37.9859	34.0014	33.5846	39.5625	48.9123
SMARCAD1	5.59745	5.94134	4.07355	6.51722	7.55937	3.73431	4.43109	4.74581	5.15386	4.12694	7.06646	8.04853	7.85722	5.03308	7.65253	11.834	11.2452	10.0286	12.092	12.3291
KCNN2	0.325269	0.272119	0.1344	0.399718	0.20707	0.0617148	0.189205	0.0591847	0.135106	0	0.133819	0	0.108532	0.116919	0	0.127357	0.126273	0.180962	0.37104	0.141596
DRG1	222.269	231.411	231.82	225.065	214.893	160.078	166.108	160.429	168.243	161.416	135.797	143.286	148.35	132.974	127.589	124.917	134.96	123.58	142.871	138.352
STARD7	87.1814	81.1027	72.2358	87.3123	87.1238	4.04652	3.00702	4.47776	9.41718	4.48137	3.33042	2.89181	2.91849	4.77445	5.54773	8.24281	8.55457	7.20649	6.64718	7.89744
SLC20A1	47.0935	45.52	42.4731	48.8214	42.8454	56.1036	54.8301	52.0047	60.4174	58.1102	71.1201	75.9923	82.9995	83.3652	80.1394	110.383	106.068	81.388	100.253	113.505
PIGO	105.027	107.818	91.209	102.805	101.488	44.6465	49.1392	56.3918	58.7168	47.6828	25.2022	25.1592	29.3025	28.8755	26.4599	22.0328	23.0836	15.8207	17.5111	22.3254
PHF24	0	0.0704807	0	0	0	6.55625	2.53283	3.37583	2.8025	3.92029	2.34192	3.45197	3.02535	2.42542	3.30387	0.247663	0.409328	0.234594	0.561123	0.367166
PRKAB1	16.4435	16.7464	14.9413	19.6981	16.1472	1.8826	0	1.58901	3.3707	1.34941	0.256634	1.16055	0.625224	1.34725	0.910178	2.6884	2.42702	1.61992	1.42224	2.44726
LRRTM4	1.82174	3.66733	2.29236	5.53196	4.03869	0	0	0	0	0	0	0	0	0	0	0	0	0	0	0.345912
PPP2R2A	85.7026	95.0621	88.2602	93.0719	93.9286	74.7526	71.6306	64.0724	77.4605	75.6552	87.7436	79.3616	84.9108	90.3738	84.6083	102.613	98.8348	121.798	97.2558	100.255
BNIP3L	76.7823	71.2318	77.3586	71.8907	74.0696	70.1867	74.6621	76.0332	70.232	69.8007	44.3767	41.0853	47.3616	51.6362	52.9547	23.1207	21.6239	18.7459	19.5313	20.5359
DPYSL2	0.543083	0.54609	0.226477	0.224841	1.39622	0.207066	0.211531	0.399102	0.455809	0.711673	0.451201	1.42831	0.915837	0.592028	0.399989	3.00752	2.77258	3.05138	4.79312	2.15084
OR5T3	0	0	0	0.393534	0	0	0	0	0.199461	0	0	0	0.160293	0.172695	0.175026	0.188014	0	0	0	0
TMEM230	6.26535	6.07063	4.37091	6.94699	6.58785	4.78687	5.70427	4.10873	3.22691	4.27471	4.06448	6.03916	3.53726	5.08157	3.86189	6.63629	6.31734	9.68676	5.8987	6.76904
IGSF9	3.10116	3.8804	3.0517	3.02493	2.21568	1.11183	1.28446	1.48281	1.05773	0.880909	0.628628	0.947664	0.637238	0.732235	0.556749	2.29325	1.63097	1.84182	1.83992	1.93985
LRRTM4	0.776887	0.390659	0.243218	0.482995	0.499827	0	0	0	0	0	0	0	0	0	0	0	0	0	0	0
MAOB	2.42716	1.53914	2.53541	2.121	1.95319	1.60027	1.18933	1.2561	1.59308	0.995048	1.10448	0.927644	1.34377	0.965079	0.978334	0.375424	0.372267	0.640113	0.437467	0.751352
VSIG8	3.87106	4.92723	5.3071	3.19131	5.12177	2.50422	2.5586	1.98346	2.58824	1.01033	1.76185	1.01407	1.42983	1.40038	0.709691	1.52483	1.51302	2.02178	1.33188	0.84795
ATP6V1B2	1.72477	2.8371	2.15399	3.10959	1.60949	0.895934	1.46451	1.55269	1.18207	0.410146	0.975209	0.882035	1.58324	0.68229	0.864376	1.29993	2.58048	1.05518	0.54056	2.06566
GFRA2	0	0.2898	0	0	0.184808	0	0	0	0	0	0	0	0	0	0	0	0	0	0.165525	0
XPO7	50.4587	47.1146	44.6376	49.195	48.0171	23.0044	20.7377	24.0053	24.4321	21.46	31.2555	31.6143	34.6209	35.7547	34.5337	49.4998	46.786	45.2972	46.2792	53.2595
PBDC1	34.6749	45.6089	43.3424	38.5251	38.7517	68.3832	47.5423	54.664	47.5554	42.108	41.4345	58.1157	51.0754	52.5733	60.1194	91.9902	82.4465	72.5186	90.7835	78.9284
DMTN	1.63109	1.54197	0.596472	1.06487	1.22545	0.32819	0.111783	0.630481	0.119962	0.124878	0.59398	0.859594	0.481909	0.311499	0.631505	0.904634	0.336496	0.535523	0.658656	0.125747
PPP3CC	67.7835	58.6089	67.8853	72.6657	61.8396	7.04238	5.90336	6.78073	6.94913	5.37344	5.30714	4.44452	7.49924	5.84469	7.14314	14.9721	11.7028	12.938	6.71879	17.2787
TCIM	1.85895	1.25314	0.800846	3.19673	0.823915	0	0	0	0.808946	0	0	0.72255	0	0	0	0.762395	1.52104	0	0	0
ZMAT4	0	0	0	0	0	0.371581	0	0.360095	0.823089	0	1.62844	0.368183	0.992833	0.713201	0.361261	0.387904	0	0	0	0.43182
SFRP1	0.255113	0	0.320897	0	0	0.292622	0.298869	0.565638	0.646239	0.672617	0	0	0.259767	0.279889	0.567193	0.609131	1.21043	0.576694	0.885797	1.01681
GOLGA7	159.4	134.842	144.696	156.942	148.667	143.698	164.551	128.759	153.065	159.759	91.9042	88.144	88.2943	83.7972	92.0343	57.3596	67.6248	68.2228	60.7796	70.3388
R3HCC1	43.9771	46.3557	41.8279	46.4022	38.3411	2.4385	3.0661	3.07106	4.33233	2.36216	3.67618	2.03191	4.14486	2.32209	2.71545	3.11138	4.24657	2.20983	2.83007	4.32628
LOXL2	0.39522	0.0793788	0.0981588	0.292013	0.100829	0.180136	0.0920371	0.259374	0.296082	0.205481	0.195486	0.0884076	0.317159	0.512509	0.173176	0.279097	0.369058	0.352484	0.361311	0.620677
TACC1	1.88042	1.81823	1.55571	2.3995	2.39697	24.5131	25.0497	18.5741	19.9854	23.9709	18.0724	17.9032	21.9192	23.8388	19.6681	22.7706	24.6111	23.6638	19.4857	24.5897
DDHD2	0.788234	0.158472	0.19689	0.586249	0	0.360327	0.368122	0.693871	0.198092	0.206198	0.588334	0.709498	0.636772	0.514528	0.521473	2.61413	3.15066	1.76828	2.53644	1.86931
PLPP5	111.18	101.607	110.641	106.813	108.229	11.149	9.05139	11.0493	6.94288	8.86866	7.80736	7.626	8.37225	8.474	10.8022	9.81632	11.8213	9.857	12.1126	9.59972
NSD3	21.8219	22.6383	16.947	24.4157	20.544	12.5893	14.2109	11.7296	13.819	12.8875	11.8822	10.0597	15.4941	15.6947	11.744	14.2476	14.9313	15.1251	9.00577	16.4932
LETM2	44.5436	45.9167	44.3646	49.3606	47.8736	12.9129	13.3175	14.0316	14.4308	11.4388	8.65262	7.70755	10.3182	9.28245	11.1514	17.8459	20.3033	13.593	18.5346	20.2623
STK10	0.171695	0.431093	0.5333	0.211552	0.766941	0.195691	0.199965	0.46974	0.428991	0.223288	0.106211	0.0960664	0.0861638	0.185648	0.094094	0.404381	0.501339	0.0957562	0.294451	0.449659
RASSF2	0.161065	0.161916	0	0	0	0	0	0	0	0	0	0	0.162693	0	0	0	0	0	0	0
KCNIP3	1.35888	0.911459	0	0.282376	0	0	0	0.250524	0.572366	1.19149	1.41615	2.5616	1.38028	1.98288	3.2651	4.31604	3.21524	3.83112	4.18529	3.30169
PCDH1	0.363568	0.228095	0.168897	0.167421	0.173474	0	0	0.0991644	0	0.117825	0.0560537	0.354906	0.136375	0.146911	0.148936	0.693481	0.528862	0.656929	0.414468	0.474453
TRPC7	0.294543	0.148023	0.183794	0	0.755313	0	0.171886	0	0.1849	0	0	0	0	0.160079	0	0	0	0	0	0
ETF1	377.751	362.896	348.272	368.926	358.594	403.492	391.387	396.746	408.29	374.662	374.355	388.63	386.711	403.356	379.135	385.417	363.281	409.917	342.085	392.453
FBXW11	202.616	204.105	200.913	208.727	197.332	37.2715	35.2768	32.2311	36.801	39.6289	35.967	36.7929	40.5324	40.6461	44.1208	53.0806	49.5527	35.6859	43.6803	49.2237
FGF18	0	0	0	0	0	0	0.22518	0.105842	0	0	0.239315	0	0.0970813	0	0.106015	0.113899	0.451919	0.107881	0.66343	0.633296
PCDHA8	0	0	0	0.0432534	0	0	0	0	0	0	0	0	0	0	0	0	0	0	0	0
PCDHA8	0	0	0	0	0	0	0	0	0	0	0	0.0743367	0	0	0	0	0	0	0	0
PCDHA8	0	0	0	0	0	0	0	0	0	0	0	0	0	0	0	0	0	0	0	0
PCDHB3	0	0	0	0	0	0	0	0	0	0	0	0	0	0	0	0	0	0	0	0
PCDHB3	0	0	0	0	0	0	0	0	0	0	0	0	0	0	0	0	0	0	0	0
PCDHB3	0.0828131	0.166336	0.205735	0.306034	0	0	0	0	0	0	0	0	0	0.08952	0	0	0	0	0	0.108413
PCDHB3	0	0	0	0	0	0	0	0	0	0	0	0	0	0	0	0	0	0	0	0
PCDHB3	0	0	0	0	0	0	0	0	0	0	0	0	0	0	0	0	0	0	0	0
PCDHB3	0	0	0	0	0	0	0	0	0	0	0	0	0	0	0	0	0	0	0	0
PCDHB3	0	0	0	0	0	0	0	0	0	0	0	0	0	0	0	0	0	0	0	0
PCDHB3	0	0	0	0	0	0	0.095327	0	0.102235	0	0	0	0	0	0	0	0	0	0	0
PCDHB3	0	0	0	0	0	0	0	0	0	0	0	0	0	0	0	0	0	0	0	0
PCDHB3	0	0	0	0	0	0	0	0	0	0	0	0	0	0.088904	0	0	0	0	0	0
PCDHB3	0	0	0	0	0	0	0	0	0	0	0	0	0	0	0	0	0	0	0	0.10917
PCDHB3	0	0	0	0	0	0	0	0	0	0	0	0	0	0	0	0	0	0	0.185644	0
PCDHB3	0	0.0835846	0	0	0	0	0	0	0	0	0	0	0	0	0	0	0	0	0	0
PCDHB3	0	0	0	0	0	0	0.0972947	0	0	0	0	0	0	0	0.183109	0	0	0	0	0.10938
PCDHB3	0	0	0	0	0	0	0	0	0	0	0	0	0	0	0	0	0	0	0	0
PCDHB3	0	0	0	0	0	0	0	0	0	0	0.20365	0	0.0826035	0	0	0.193839	0.384491	0.183604	0.188198	0
TLX3	0	0	0	0	0	0	0	0.170201	0.194359	0	0	0.174034	0	0.168275	0.170547	0.183205	0.181835	0.173497	0.177764	0
CBLN3	0.206761	0	0	0	0	0.710188	0.483633	0	0	0.271507	0.258178	0	0.419328	0.677684	0.686746	0	0	0.465621	0	0
KCNIP1	0	0	0	0	0	0.191656	0.391593	0.184605	0.21082	0	0	0.377523	0.169428	0.182538	0.184997	0.397441	0.394522	0.188184	0.192798	0.442111
NPM1	769.23	727.108	675.908	693.493	730.858	1794	1892.56	1684.69	1787.39	1790.17	2179.49	2440.07	2279.44	2242.2	2146.03	2260.03	2180.14	2623.15	2105.25	2333.83
CLDN7	323.598	296.359	319.661	328.632	288.298	164.096	169.12	167.353	221.082	140.882	101.389	110.532	117.415	114.228	112.954	90.0804	90.7156	96.3206	89.4758	91.1013
FGF11	0	0	0.0642455	0	0	0	0	0	0	0	0	0.0578584	0	0	0	0	0	0	0	0
NLGN2	0.246064	0	0.153273	0	0.157461	0.140423	0	0	0	0	0	0	0.247749	0	0	0	0	0.13763	0	0
EPO	0.344484	0	0	0	0	0	0.404828	0.769078	0.879053	0.457426	0	0	0.706952	0	0	0	0	0	0.401312	0
ENDOD1	0.394416	0.396086	0.48979	0.291415	0.402489	0.0898844	0.183699	0.172562	0.492461	0.307591	0.0975429	0.441134	0.474764	0	0.086411	0.0928421	0	0.0879406	0.090143	0.103234
GIGYF1	28.4274	26.2753	21.7099	27.2481	27.0582	47.8088	47.2491	45.3963	50.602	45.7694	42.4098	45.5058	45.8259	47.2132	45.568	36.3311	33.874	33.276	31.2524	35.7114
TMEM88	0.600651	0.302446	0.75805	0	0.389577	0	0	0	0	0.397362	0.755446	0	0.306994	0.330787	0	1.43947	0.71545	0	1.04622	0.400565
KDM6B	0.59874	0.661242	0.445499	0.368065	0.533857	0.0681755	0.139339	0.326974	0.223929	0.0777048	0.517511	0.936179	0.359778	0.904354	0.523877	0.914701	0.906972	1.06641	0.683271	1.17346
PCOLCE	0	0.192221	0	0.237601	0.245888	0.218713	0	0	0	0.501353	0	0	0	0	0	0.681019	2.02855	1.28974	0.660589	1.01019
PER1	0.116278	0.116739	0.0720892	0.214408	0.148091	0.0661956	0	0.0634913	0.0724699	0	0	0	0	0.0627155	0.0635778	0	0	0.129421	0	0
VAMP2	1.41836	0.954341	0.604348	1.20405	1.86445	0.546786	0.558106	1.06611	1.21934	0	0	0	0.490563	1.05733	1.07073	0	0	0.543683	0	0
AP4M1	16.1544	15.6459	17.7389	11.6603	12.8363	7.07672	5.13022	6.16431	7.54371	6.54339	7.4668	10.5801	10.914	8.71023	10.8129	9.24387	9.4144	10.0996	9.19582	10.0206
ARRB2	116.464	109.621	119.174	114.384	116.221	45.8354	39.2007	51.9898	54.919	39.8198	47.8576	50.6387	56.0232	49.5879	51.9013	70.7921	75.1181	52.9996	68.242	70.3877
MED11	29.9748	29.6716	35.4914	27.1871	37.365	24.4939	30.2896	26.953	30.0191	22.5566	29.6497	38.7261	26.1852	26.7761	38.8237	40.0796	41.5575	56.484	44.0382	49.9438
RNASEK	5.78576	2.69417	4.54185	3.95754	2.91891	1.02835	1.04973	0.500707	1.14519	0.595851	2.26435	1.53579	0.921355	0.992892	0.502774	7.01581	2.14922	2.55333	7.83488	4.20793
C17orf49	47.2063	55.2579	49.4213	45.9442	43.3138	49.8149	51.1135	47.6033	68.7553	48.4721	40.0615	50.6393	53.8898	54.8939	49.8529	52.1686	49.2894	67.8964	43.4692	59.3174
NLE1	23.9839	26.6566	21.1187	32.4828	26.7594	35.288	34.2422	38.761	35.2309	39.0688	34.3554	39.4757	37.4157	43.9884	41.011	51.5659	52.8292	50.7318	43.8866	51.7861
LTN1	28.5369	33.6074	27.5501	35.3082	33.3593	23.2393	24.3791	25.6453	29.1221	23.3626	20.5179	24.4756	23.9374	25.4624	21.5322	17.7587	17.0475	10.8572	17.1077	16.2836
CADM2	0.269074	0.270867	0.338805	0.336698	0.696413	0.617598	0	0	0.682385	0	0.337603	0	0.822935	0	0	0	0	0	0	0
GBE1	9.27397	9.68365	10.4847	10.1872	6.41785	3.26364	3.54242	5.89663	4.48958	4.43953	2.88876	2.41176	3.78866	3.49873	2.36385	1.05797	1.26038	1.60295	1.23162	1.8831
INPP5K	18.6961	18.0342	16.01	22.7267	14.7748	2.38318	1.82552	2.01578	2.63208	0.684877	0.651127	0.883331	0.264508	0.284998	0	0	0.924415	0.880799	0.901909	0.345122
PITPNA	0.29179	0	0	0.365829	0	0	0	0	0.741372	0	0	0.331685	0	0	0	0.349396	0	0	0	0
SLC43A2	1.58364	1.6842	1.38961	2.41186	1.66537	112.363	117.637	97.004	106.315	111.157	158.56	164.901	172.05	178.598	174.499	214.043	221.452	218.33	180.728	205.549
HEPH	0.0964765	0.0969065	0.119958	0.356935	0.123227	0	0	0	0	0	0	0	0	0	0	0	0	0	0	0
PAXBP1	28.1931	30.8494	26.6916	26.3575	32.4255	26.6079	25.0134	23.9199	24.3897	25.3893	31.5491	33.0304	40.1285	34.6451	31.3301	48.2909	42.0074	42.093	38.9788	47.3391
SLC7A1	0	0.145684	0	0.358966	0	0.331144	0	0.31868	0	0	0.180139	0.162929	0	0.157522	0.159653	0.686027	0.170207	0.48727	0.166428	0.381525
MTUS2	4.58429	3.14196	3.61288	5.37362	2.78331	0	0	0.0795537	0.18162	0.0945337	0	0	0.0729539	0.0785924	0	0	0	0	0	0
SLC46A3	0.500755	0.167812	0.417222	0	0	1.71744	0.194949	2.3894	1.25941	0.436975	0	0.375878	0.168689	0.363482	0.18419	0.197854	0.589198	0.187364	0.383917	0.220091
STOML3	1.01247	2.0402	1.70839	1.27433	1.3171	0.388317	0	0.753056	0.86071	0	0	0	0	0.745852	0	0	0	0	0	0
VPS36	21.5972	26.3687	18.8097	27.102	28.4299	15.5638	14.8861	18.3241	18.7407	16.0986	12.0693	11.4051	11.9894	13.8619	18.2005	14.9211	14.2974	12.0193	16.1435	14.1164
PROSER1	12.2944	13.2429	9.63218	13.7251	11.8278	33.4111	30.301	32.8644	35.9589	33.8401	39.5796	43.1785	43.9164	45.3841	45.4185	50.2667	52.2509	56.3587	38.6131	58.3465
THSD1	0.589204	0.236796	0.2935	0.582343	0.301515	1.21024	0.961769	0.646371	2.06636	1.38278	0.584593	0.660938	0.474382	0.383299	1.16553	0.834771	0.552141	0.922386	0.405118	1.08311
TPTE2	35.6101	36.2153	39.1335	33.5856	38.0316	12.5888	13.8511	14.7533	13.1224	11.9982	7.19835	10.3218	9.26239	10.1324	9.64716	5.85037	6.96697	8.2317	9.57027	8.92403
SMPD1	22.397	20.103	22.1067	24.7333	21.7445	4.02154	3.96216	3.17672	3.78482	3.61149	4.21596	5.08429	7.72977	6.55284	4.84299	19.1761	19.7645	18.7245	16.8799	20.0046
ILK	84.8067	78.8449	74.931	86.6883	80.4316	68.0179	84.3353	79.1826	74.3498	82.8781	53.0156	51.8822	55.3041	58.0605	60.6128	37.4649	37.7499	39.7387	34.4188	35.6169
TIMM10B	121.712	131.13	134.827	126.848	126.123	22.5306	20.0646	22.8468	21.8581	14.4247	20.0314	27.6496	20.1569	20.7971	26.6808	30.1489	36.5082	52.3061	40.8621	34.6965
CD96	16.6584	16.2128	14.7155	17.0344	14.782	0.599018	0.765029	1.72849	1.48021	0.513606	0.488529	0.147287	0.132158	0.427137	0.288621	0	0.307667	0.146825	0.300913	0
MTNR1B	0.276754	0.278625	0.348672	0	0.358354	0	0.324466	0	0	0	0	0	0	0	0	0	0	0	0	0
FAT3	0.10252	0.0617265	0	0.125632	0	0.0466249	0.0953042	0.0669838	0.152886	0	0.0504842	0.0913277	0.122799	0.066142	0.0447051	0.240197	0.119036	0.0455103	0.0699984	0.0801034
CHORDC1	38.6737	45.6959	42.2877	35.1623	41.0946	34.9942	34.3067	29.4822	27.8826	34.2589	51.3379	65.1401	50.4454	53.6842	50.3093	70.0828	71.8459	76.7076	65.4376	78.4165
KPNA7	343.279	316.313	343.066	307.793	324.413	11.3579	10.8281	14.8602	13.6355	13.6133	7.98696	6.22728	5.14477	6.98914	7.5708	2.0984	2.08414	3.22863	2.54368	2.91853
GRM5	0	0	0	0	0	0	0.118239	0	0.253844	0.264246	0.251372	0.341042	0.203953	0.329582	0.556796	0	0.11868	0.113317	0.23228	0.133046
TMEM135	70.6555	68.734	70.9807	69.6931	75.6485	10.2211	10.9733	12.8406	14.663	10.1093	2.6394	3.92189	2.75454	2.96764	3.34193	3.23099	3.02858	2.37985	2.6126	2.39591
CCT8	302.314	316.529	302.452	295.285	313.883	188.835	182.972	224.208	218.696	208.083	224.495	202.653	210.703	209.982	198.237	207.585	208.322	180.584	189.401	208.472
BACH1	0	0	0	0.14951	0	2.34729	1.2697	1.06205	0.909448	2.05117	3.45194	1.90046	3.4102	2.49301	5.31978	6.57236	9.7814	7.71318	7.21107	7.15056
GRIK1	20.9137	24.3705	22.7668	21.1633	24.3232	3.33945	1.58424	3.32335	4.44832	2.1791	1.68424	1.52336	1.47168	1.47222	0.803539	0.739959	0.978726	0.46723	0.478861	0.685737
TIAM1	3.16123	3.42135	2.3871	2.79107	2.95475	16.4727	16.3746	15.1476	15.4431	10.8886	15.1136	12.8435	18.4846	16.2923	12.9003	12.3535	12.0753	11.922	10.9271	11.8
SOD1	215.908	210.72	213.451	206.219	208.187	28.3199	25.5389	28.8665	34.2121	23.3137	9.2668	12.7533	11.1356	11.6459	13.2283	17.2751	15.2674	13.8086	14.1345	15.3845
SCAF4	109.584	113.796	94.8542	114.854	109.588	126.264	122.263	132.173	126.079	121.341	109.937	99.6396	102.751	124.323	118.866	99.5188	105.382	97.0938	96.8234	101.64
UGT2B10	0	0	0	0	0	0	0	0	0	0	0	0	0	0	0	0	0	0	0	0
POSTN	0.179186	0.539907	0	0.331277	0.343127	1.12342	0.626149	0.686524	0.671765	1.28205	0.221753	0.80229	0.179903	0.19381	0.491149	0	0.104678	0.199926	0	0
TRPC4	0	0.0849017	0	0	0	0	0	0	0.1056	0	0	0	0	0	0.0926484	0	0	0	0.0966439	0.110687
UFM1	26.407	19.913	18.4647	22.6427	18.5255	18.8731	14.8155	13.5894	17.487	19.1124	21.4221	22.1152	20.0269	18.7376	21.0997	31.3183	33.7493	43.1201	33.1818	35.0685
FREM2	1.90065	1.79967	1.77579	2.1121	1.73267	0.611952	0.958957	0.430065	0.758557	0.78969	0.309398	0.359812	0.358421	0.231666	0.352296	0.21031	0.208481	0.278922	0.163416	0.280565
TRIM3	10.5018	8.89535	7.18215	12.0449	10.0186	5.37119	5.3224	4.842	3.65501	3.52648	4.06135	3.19433	3.22277	3.549	4.69262	3.86551	3.8333	3.9003	3.75337	3.64399
ARFIP2	42.2275	43.5395	38.1208	38.9101	36.1798	8.22054	13.5835	12.5971	13.0567	12.4808	10.2856	11.4494	9.85239	8.99979	8.41849	11.0513	11.9729	11.891	11.9359	15.9288
SLC46A3	2.05744	3.10625	3.88256	1.60745	1.99508	0.88505	1.20525	0.570313	1.62897	0.678182	0.322384	0	1.30959	0.564415	0.285944	0.921255	0.610234	1.45365	0.297703	0
SYNJ1	8.58137	9.60746	7.91952	9.21737	9.9183	0.844994	0.575706	0.49497	0.667634	0.374247	0.864794	0.736201	1.3201	1.91094	1.21644	1.79121	2.15967	2.61401	1.17546	2.31428
SLC9A6	6.31635	6.85465	5.50952	5.7787	5.17496	2.16301	0.736667	1.52541	0.63334	0.824094	1.09742	0.70899	0.763364	0.137067	1.25035	0.596998	1.03663	1.13082	0.869115	0.829961
FHL1	15.5411	18.0762	13.124	12.0995	19.9868	3.21336	2.84492	3.51049	5.89617	3.92785	0.933824	0.422296	0.947778	0.816904	0.620902	0	1.32433	0.421021	1.29388	0.741954
ADGRG2	0	0	0	0	0	0	0.193	0	0.207786	0	0	0	0.166988	0	0.364667	0	0	0.185477	0.190027	0.217872
HTATSF1	119.351	133.763	120.013	115.656	123.332	141.181	146.713	158.781	147.644	144.265	139.254	139.429	133.464	137.275	122.968	115.31	112.573	123.695	112.081	108.402
FGF13	0.492281	0.329933	0.205038	0.407037	0.42133	0.187577	0.574894	0	0	0	0	0	0	0	0.18103	0	0.386052	0	0	0
F9	0	0.21149	0.52719	0.261778	0.270864	0	0	0	0	0	0	0	0.213263	0	0	0.250089	0	0	0.242547	0
MCF2	0	0	0	0	0	0	0.109934	0	0	0	0.350469	0	0.0947799	0	0	0	0.1103	0	0	0
ARR3	0.892029	0.673084	0.279853	0.277965	0.287581	0	0.782894	0.986471	0	0.293224	0.836437	1.26083	0.679358	1.21993	0	0.265542	1.05498	0.251424	1.54503	0.295464
ZNRD2	16.6574	18.5734	15.0902	13.9131	12.6431	34.9347	33.0774	28.0955	32.6918	38.1257	30.0923	31.749	41.2658	41.0488	47.0169	54.7188	42.3102	59.3187	56.562	55.0306
FAM89B	9.15939	10.56	17.7925	12.18	13.7212	1.00746	1.54264	2.45178	8.97171	2.91757	4.98947	5.01349	3.60895	7.29211	5.41584	4.7565	5.78739	6.00122	2.04619	5.88656
FRMD8	20.4038	18.4593	18.6441	20.0473	22.8096	16.4316	18.6561	16.6987	19.6944	18.8573	21.0686	26.1318	19.2071	23.5175	24.5786	30.7756	27.274	25.9533	19.759	31.4615
VPS51	60.1977	68.3161	59.407	57.9348	66.104	6.23503	6.84807	5.84843	9.24643	6.23841	5.9337	4.44681	4.81581	5.33653	3.90639	8.39302	8.80918	8.40726	7.36187	8.61691
TM7SF2	4.94406	4.74809	3.10256	4.2023	4.3476	0	1.05199	1.49133	1.98752	1.18212	0.843011	0.254148	0.684707	0	1.24592	1.33815	1.32912	1.5204	1.29763	0.893371
ZNHIT2	3.3488	7.48346	6.05381	5.31692	6.69881	16.6019	12.3936	15.7973	14.5276	13.9021	11.829	16.3627	15.6309	15.6232	10.2812	17.0067	15.5693	19.6596	16.9257	18.4283
MRPL49	36.2177	37.4304	36.0499	38.1417	29.5392	16.8369	17.187	10.4323	15.9064	17.1437	15.1643	16.761	16.4536	13.7909	15.962	28.9133	24.5207	33.439	34.2032	27.4341
FAU	189.411	184.465	234.87	191.048	184.113	159.227	146.27	140.786	134.696	168.833	120.437	101.798	115.279	104.059	97.85	99.2532	102.297	117.387	113.345	86.7859
CNIH2	1.05029	0.937989	0.29063	0.288321	0.746415	0.399485	0.544233	0.640049	0.292306	0.152139	1.01303	1.04716	0.939475	0.506061	0.641181	0.413301	0.95678	0.521922	0.267438	1.22572
WDR74	41.5284	32.7124	35.0483	37.7279	33.018	48.2312	43.8206	53.485	58.1662	50.3369	71.7849	73.6967	70.9317	76.4262	63.3845	63.4504	67.3289	68.8194	58.8241	76.7819
EHD1	116.974	128.645	126.212	122.403	123.112	88.3781	85.8989	95.5154	103.322	94.372	51.4843	52.9158	56.5713	51.739	53.7737	15.1182	20.845	19.4422	17.4517	18.4078
CXADR	117.437	98.6168	101.921	104.092	107.969	36.5922	39.6454	40.1998	38.0992	32.7931	19.5811	16.1795	20.8072	20.7258	21.218	15.654	16.6862	16.7848	17.6403	17.9278
AUTS2	7.69751	6.62577	6.04729	5.12618	5.91118	1.70048	1.00601	1.28865	1.17682	0.918802	2.13671	2.10834	1.57574	2.80092	1.46267	3.79015	3.75884	5.34131	3.32095	4.00881
INTS2	8.74877	10.5004	9.15978	12.7822	12.4577	3.73685	4.296	5.4531	5.11607	4.61576	5.32036	5.80525	6.71303	5.60837	4.11439	6.75164	6.69517	3.73064	4.91696	5.89837
MED13	91.1288	98.961	73.6944	95.2442	92.0465	35.1497	38.7281	33.4561	39.6596	34.4058	35.9289	35.2388	37.5185	39.6608	34.2651	39.4447	36.3483	40.7805	30.7075	38.7005
RNFT1	61.7211	60.7033	60.3721	61.5917	55.1373	7.66995	6.26852	6.649	11.6008	8.34296	4.17608	6.42101	4.40728	4.93093	6.10788	12.3267	10.4599	8.28412	7.52278	8.62536
PTRH2	39.8791	49.4597	59.8221	47.9347	46.9106	51.5107	39.4414	38.4455	42.9327	37.2322	30.8301	46.1639	31.2458	31.4553	38.1424	34.6846	24.448	24.1624	25.1874	30.0421
CLTC	72.8131	77.5608	66.5923	75.355	76.4296	38.7927	41.9298	43.6902	45.0995	43.8644	33.5028	31.3424	34.0031	36.1287	34.1391	39.8405	38.4167	29.8583	35.2112	38.5551
BTG3	330.104	351.937	344.409	340.192	352.813	56.4371	59.3884	57.2721	80.4338	55.8137	38.4777	48.9607	40.7313	44.349	45.1767	39.1717	27.6081	37.0902	33.578	31.4926
BBX	17.3213	19.5682	15.3106	18.4242	19.073	20.1424	18.7889	20.2335	19.447	18.8398	20.206	14.6549	20.8888	18.8374	21.9641	15.6085	16.9327	17.3597	17.7868	15.141
CBLB	19.0512	19.1356	18.4082	19.4203	17.8257	2.90326	2.63698	5.68034	5.77731	2.33199	1.40111	0.316822	0.852555	1.83693	0.827563	0.88912	0.22048	1.15795	1.18684	0.617946
ALCAM	0.654055	0.219025	0.271329	0.807451	0.139366	1.24352	1.14354	0.717032	1.22794	0.994195	1.08083	2.56618	2.30213	1.77153	2.87305	3.60108	4.97592	5.23784	5.11841	5.43498
ZPLD1	0	0.18025	0.224239	0	0	0	0.209455	0	0	0	0	0	0	0	0	0	0	0	0	0
PICALM	116.855	106.16	107.884	115.455	113.173	8.8848	11.0314	13.8502	21.1508	10.6819	4.76998	5.53369	6.89798	5.89057	6.15491	6.21811	6.9502	6.45068	6.89953	6.80453
CCDC83	0	0	0	0	0	0.271768	0.277584	0.787436	0	0	0	0	0	0.519427	0.526332	0	0.561533	0.2676	0.27405	1.25803
SYTL2	0.234258	0.117682	0.291712	0.289396	0	0.935587	0.955937	0.899405	0.733487	1.06894	1.16206	1.05106	1.41446	0.888909	0.643571	0.414841	0.960349	0.523865	0.40265	0.153786
CREBZF	3.96471	3.27311	4.23932	3.68097	3.62948	65.1746	104.59	87.1451	81.2058	80.2757	58.5845	62.694	62.8279	70.6107	59.0932	52.0913	57.5125	62.6574	56.8891	53.2815
TMEM126A	10.2445	12.6527	16.121	7.30802	12.0603	0.660638	0.674124	0	0.739852	0.769804	0.730998	1.32204	2.38219	1.92559	1.29966	3.48645	2.08554	0.659568	2.02235	1.55434
DLG2	2.71439	1.11085	1.37543	1.48827	2.18361	0.343939	0	0.55071	0.754458	0.261791	0.249037	0.337875	0.505144	0.326519	0.330973	0.474115	0.470306	0.449059	0.460248	0.263619
IFT46	7.4853	7.76717	8.51953	7.00395	3.92468	14.4771	19.1684	12.1682	20.1116	18.1624	28.3915	24.0897	30.6699	26.8971	22.0635	38.7501	35.4462	45.927	40.8176	34.433
VPS11	41.123	40.9798	43.4593	38.0473	47.6216	4.67877	4.1346	2.9168	7.0765	2.31103	2.61055	1.86409	1.7838	2.04184	2.19138	4.1854	5.57953	6.07002	6.22089	5.52731
HYOU1	339.869	366.139	268.501	326.339	367.443	36.4434	32.8332	38.6451	54.3581	36.6697	22.4019	18.8509	23.4186	21.6248	20.1431	27.6885	30.1988	29.8433	24.2032	24.6551
H2BC17	22.5603	24.3742	20.871	16.7771	34.6227	51.0699	60.8059	42.7642	46.2056	37.4729	53.0494	25.5042	51.9519	59.5259	42.9661	56.9969	56.7963	34.5333	79.2807	52.0944
H2AC21	144.685	169.957	164.634	144.451	178.467	732.064	736.256	619.103	802.188	660.691	817.295	535.429	820.56	844.258	701.247	879.82	1084.91	953.842	1181.65	903.937
ZPR1	50.0742	51.2986	44.8355	34.2602	48.4809	28.3235	26.5226	22.7521	26.9306	25.5728	27.1252	25.5907	31.138	31.0932	27.1571	51.8828	41.7848	45.5447	51.1919	49.7923
HSPA8	2200.03	2240.29	2291.72	2241.97	2195.63	4433.76	4115.24	4117.89	4158.64	4293.68	4258.17	4285.51	4307.38	4196.29	4217.99	4072.78	3708.9	3338.3	3704.34	3948.39
JHY	16.0363	14.8544	15.5751	13.9057	13.382	0.519053	1.59104	1.24729	2.56328	1.33414	0.282019	0.510159	0.343264	0.616345	0.37484	0.134234	0.266347	0.381406	0.260586	0.298567
BSX	0	0.430271	0	0.541012	0	0	0.502733	0	1.09592	0	0	2.44979	0.440828	0.950094	0.481126	0	0	0	0	0
IGSF5	7.79659	9.79449	7.81423	6.20329	9.27692	0.954003	1.46204	2.60069	2.79493	1.81834	0.345902	0.312857	0.701853	0.151228	0.306553	0.164659	0.163401	0.155941	0	0.366282
OPCML	0.370313	0.558574	0	1.8404	0	0.423643	0	0	0.23318	0	0.461637	0.835052	0	0	0	0.659388	0.436444	0.208132	0	0.24452
PANX3	0.432477	0.870131	0.271225	0.538748	0	0.495338	0.758953	0	0	0.568338	0	0.244386	0	0	0	0	0.255581	0	0.249567	0.286329
PKNOX2	6.97502	6.29486	7.81371	6.87275	6.38563	1.78844	1.99332	1.2516	3.57292	1.67363	0.530616	0.319949	0.861341	1.54661	0.62702	0.336789	1.00268	1.11634	0.980465	0.936493
TMEM218	2.25086	1.13717	2.17247	0.722152	1.48978	2.61209	1.9991	6.38941	6.57999	0.760713	7.94622	11.105	4.70796	8.24534	9.63209	13.092	11.6776	11.7322	14.6562	8.44762
CNTN2	7.26373	6.11308	3.29574	4.60064	3.13478	0.783499	2.05864	2.15042	3.06874	2.17225	2.188	1.2094	0.788981	1.16872	1.29237	0.578536	0.573873	0.219186	0.561625	0.12867
ROBO3	3.00284	2.76877	2.50814	3.39091	3.1227	2.58197	3.06642	2.47679	2.21582	3.97708	6.20555	5.47602	5.89256	6.14955	5.96592	23.8403	21.9251	27.5632	21.6818	27.6278
MSANTD2	2.90833	3.41449	3.35028	2.72325	2.50399	0.833584	1.41902	1.07367	0.306648	0.638337	0.91038	1.09782	0.493026	2.39044	0.269132	2.02328	1.72286	1.91561	0.560492	0.96492
ESAM	1.05505	1.27355	0.793697	0.525489	2.17489	0.241633	0.246823	0	0.798898	0.277181	0	0.476764	0.214051	0	0	0.251012	0	0	0.24344	0
FEZ1	0.174949	0	0	0	0	0	0	0	0	0	0	0	0.176925	0.381233	0	0.415015	0	0.196501	0.402621	0.230838
FOXO1	9.55447	11.6805	9.37942	10.942	8.43276	0.21434	0.656874	0.619836	1.17988	0.491248	0.233583	0	0.189659	0.204337	0	0.444861	0	0	0.215765	0
LHFPL6	1.4224	1.07267	0.667162	0.66232	1.1425	3.05025	0.830948	1.17567	1.79026	2.32935	2.43676	4.2075	4.49632	2.13148	3.53477	8.2266	7.53881	9.58792	7.77609	8.21302
CKAP2	396.149	386.396	353.705	338.756	380.024	5.74951	6.58597	7.71506	13.2151	7.17698	7.9637	9.4323	8.00334	13.2654	10.4196	18.4142	16.3051	23.5933	14.3642	14.4582
THAP12	104.863	114.387	100.532	108.965	114.582	92.6851	91.3193	106.734	104.759	102.21	79.7593	74.7714	82.0977	90.8423	71.8989	61.2693	55.3026	45.3709	51.3936	56.003
WNT11	0.346943	0.34883	0	0.645957	0	1.7853	1.62119	2.48444	2.40083	1.81747	0.864233	1.17249	1.05245	0.566947	1.5322	1.02865	0.408463	0.584456	0.798354	0.228859
UVRAG	73.9078	83.6266	69.5926	79.1127	79.2543	1.8538	3.44355	5.0282	7.77908	1.92797	1.65035	1.49268	0.893037	0.48106	2.11278	1.3967	0.866343	0.826696	1.3553	1.55353
DGAT2	0	0	0.189116	0.375374	0	0.173087	0.353669	0	0	0	0.753453	1.70367	0.764478	1.64724	1.0017	7.17367	12.1036	4.41585	3.65444	9.17625
MOGAT2	8.27863	9.65448	12.2076	11.5012	9.56643	9.84245	4.64083	8.20346	9.57654	6.71778	5.77069	7.26977	5.01928	6.66943	5.66321	17.4651	21.4271	11.8933	14.4698	18.9913
MAP6	0	0	0	0	0	0.418281	0	0.403129	0.230206	0	0.227877	0	0.185018	0.199337	0	0	0.215433	0.821913	1.26299	0.965592
UMODL1	0.37384	0.250427	0.621041	0.15404	0.159503	0.142236	0	0.136774	0	0	0	0	0	0	0	0	0	0	0	0.163717
ZBTB21	30.9228	29.2123	24.1699	29.1994	27.0487	3.21802	3.79395	2.61676	3.9381	2.8272	4.84089	3.04062	4.5826	4.81939	3.57442	6.78427	6.98429	6.18312	6.70965	8.11411
ATG101	122.252	126.735	136.093	130.988	132.772	20.0798	18.3654	27.5241	25.8197	21.0164	10.8092	8.88725	10.9112	11.183	11.3309	8.42436	10.5409	8.27102	13.0062	10.0698
RAD51C	31.8131	34.6198	25.7517	30.8744	31.6347	4.32164	4.13826	2.86941	4.46996	4.65251	5.01345	7.20151	5.0306	5.67828	6.79993	6.17953	7.25462	3.98917	5.17478	6.87627
PPM1E	0	0	0	0	0	0.213647	0	0	0	0	0	0	0	0	0	0	0	0.629818	0	0
TRIM37	47.4776	44.9176	41.2251	47.7392	47.8949	1.21754	1.86625	0.751255	2.85856	1.68626	1.13242	1.19497	1.2248	1.15454	1.25395	2.60476	2.31596	3.40312	2.6163	1.99744
RABGEF1	92.4328	85.5738	83.4422	92.5074	90.8967	14.3496	14.2894	18.1127	25.2149	15.6932	12.022	9.43974	12.1128	12.8184	11.0032	15.594	14.7211	11.911	14.7709	16.9221
KCTD7	5.9457	4.52319	2.81038	5.37963	7.42494	2.75502	3.75279	3.89098	5.04931	2.3126	0.399899	0.542537	0.811565	1.04923	0.53169	0.190381	0.566907	0	0.554153	0.423543
CUX1	12.798	11.1503	10.2692	13.2183	12.9813	0.213493	0.48001	1.06397	1.35443	0.437591	0.185053	0.251073	0.600254	0.323313	0.245832	0.704414	1.44025	1.16777	0.769695	0.881002
MYL10	0.59433	0.600773	1.53332	0	0.788684	0.690545	1.40918	2.02957	0	0	0.764877	0.691647	0	1.34356	0	0	0	4.141	4.93695	0.813389
TBL2	42.932	42.3281	45.5351	39.6367	40.7359	20.5476	16.2413	23.1315	21.03	16.5573	24.2832	20.2731	18.6377	26.1516	24.8445	43.4574	50.226	34.6509	41.8991	39.5865
PRDM15	3.876	5.57743	2.99764	5.04189	5.48934	10.7534	10.9876	9.52892	13.1071	11.5975	9.60458	11.1524	10.5311	13.8413	9.19998	13.2199	14.8301	11.5849	10.0743	12.9153
C2CD2	36.2179	39.8456	30.4363	32.7762	38.1814	17.936	21.7619	18.1892	18.3065	17.4548	12.1858	10.6084	13.3499	15.0482	11.8782	14.0659	14.6754	13.3217	8.72593	17.2562
MDH2	244.598	247.68	270.731	237.711	251.7	72.0657	71.2592	84.0656	90.0198	75.5496	62.1055	48.7935	62.6856	58.4806	61.4816	55.8701	48.9777	40.7325	63.1458	62.8387
RYR1	0.0434638	0.0654242	0	0	0.0552044	0	0	0.0236673	0	0	0	0.0242015	0	0.0233701	0	0	0	0	0	0
IL2RG	1.07262	0.360325	0	0	0	0	1.26108	0	0	0	0	0	0	0	0	0	0	0	0	0.479246
CFAP298	85.91	79.7248	81.6161	70.0896	86.9125	19.9243	22.1108	16.8528	23.0464	20.8837	25.4933	16.9893	20.9222	25.125	20.4635	29.3904	22.8435	28.3124	26.7679	24.1702
EVA1C	6.61327	6.2234	4.54786	6.64217	6.32272	0	0.998231	0.235742	0.807839	0.560566	0	0	0	0.233205	0	0	0	0	0	0
MIS18A	3.70265	6.52608	6.23434	4.2614	4.00503	29.0801	29.6964	19.9216	26.6915	28.1881	49.7049	37.5776	49.5538	47.2731	45.1363	58.8262	62.5271	52.8836	51.6258	63.8343
B3GLCT	5.38668	1.12072	4.18432	4.38512	1.91085	1.48752	2.82207	1.63862	1.16968	0.730505	0.463132	1.25663	0.376037	0.60771	1.43703	1.54356	0.21893	0.626418	0	0.490625
RXFP2	27.195	35.132	26.4651	26.5563	31.8489	0.554233	1.69884	1.06577	1.82528	1.7417	1.80733	0.68112	2.07775	1.4484	0.800771	1.29041	1.70709	1.35794	0.695804	2.71081
FRY	0.0674085	0.101483	0.0834356	0.124044	0.042847	8.20471	6.97457	8.52348	5.99596	6.67856	8.68066	8.79097	9.83458	9.97752	10.8142	9.40696	9.24662	7.52603	9.21374	10.1941
ZAR1L	149.298	214.533	195.097	160.309	232.205	25.0875	27.7151	27.9366	25.0906	33.7083	17.5969	14.2819	12.4745	13.442	16.8204	9.4596	6.84294	8.13937	10.8285	6.70237
KL	10.5773	10.3186	9.36151	12.1716	10.9163	0.9279	1.5407	1.11436	2.16275	1.05947	0	0.227895	0.613297	0.770833	0.558105	0.479686	0.475837	0.34075	0.814889	0.800153
RFC3	60.6798	66.4331	65.1901	48.5535	56.0883	26.9389	29.2075	35.1051	30.2036	40.9236	31.1833	28.4364	31.6021	32.9211	31.0763	34.6054	36.3151	30.2108	40.704	35.2251
STARD13	0.606859	0.487429	0.752611	0.59693	0.618433	0.552816	0.77678	0.729141	0.0756602	0.315054	0.0749373	0.0677808	0.182341	0.196431	0.066377	0.142641	0.282873	0.202675	0.0692576	0.396485
NBEA	10.571	10.8091	7.21867	10.3661	11.1632	3.39253	3.12043	3.07023	3.75133	3.08991	1.0617	1.10806	1.29139	1.31981	1.15722	0.272014	0.231122	0.184061	0.264208	0.172799
DCLK1	5.53127	5.21836	4.68493	4.95573	4.49159	0.7641	1.07359	1.92572	0.837452	0.871782	1.45138	1.31276	1.00922	1.17783	0.918421	1.08544	0.978665	1.30852	1.05384	0.768068
CCDC169	0	0	0	0	0	0	0	0	0.53378	0	0	0	0	0.462728	0.937324	1.5093	0	0	0	0.560311
SPART	0.344036	0.172951	0	0.640467	0.220971	0.393388	0.200941	0.568467	0.216403	0.45051	0.642674	0	0.695671	0.562127	0	0.407965	0.404988	0	0.197896	0.226914
CCNA1	1756.1	1947.3	1931.41	1848.31	1827.02	191.692	198.293	255.847	354.981	207.627	65.014	46.3207	74.3507	66.4074	59.0591	10.867	9.28636	5.98229	8.82341	7.31079
RFXAP	100.372	92.0075	97.2914	100.775	93.3022	39.0253	29.6532	37.441	37.9497	30.1622	20.1404	15.1278	15.5329	19.4261	25.7388	18.5355	19.3891	27.399	17.3365	18.8194
ALG5	156.854	152.95	159.1	145.855	161.844	59.3867	57.6364	74.2523	63.2991	64.8639	49.0761	57.2334	45.3803	57.6572	44.6746	49.2076	43.0865	33.1932	53.369	47.574
EXOSC8	89.4479	74.5515	79.186	76.3613	85.0751	60.8299	48.0673	59.2814	54.5195	51.7349	57.1067	48.4187	55.7678	47.5863	55.2471	72.1696	69.1217	94.0674	78.3504	70.2424
SUPT20H	54.1753	60.2152	51.6339	60.7472	52.7785	17.8546	17.6436	15.8005	19.3272	16.2294	21.9458	19.0417	21.5331	23.644	23.2881	22.2264	21.3254	24.2726	20.161	25.7975
C21orf91	48.9167	50.9738	47.1885	57.8103	59.7136	5.17307	5.28117	8.6882	7.31957	5.98492	2.06792	1.87012	1.26172	1.81285	1.83614	2.95667	1.47124	3.26436	2.38546	4.39034
RIPK4	46.0319	47.8733	46.1344	50.5241	49.3397	46.9338	42.5098	51.2152	42.8356	38.2396	16.2372	12.9786	14.9104	18.8138	13.8288	7.66822	7.13127	4.53934	6.51338	6.26235
NSUN5	38.902	46.7418	39.8895	45.1613	42.7108	102.376	96.7674	112.339	103.897	94.9889	103.382	113.359	95.7044	95.5755	98.5748	83.9039	75.1859	74.1803	85.7284	82.7559
POM121L2	161.096	172.117	139.092	175.192	157.981	107.904	118.208	114.858	128.204	107.846	107.193	89.2214	110.717	112.177	97.3313	100.097	111.184	139.229	90.9592	103.84
YPEL2	3.27866	4.64353	4.24895	4.242	1.74873	0.763678	0.779069	2.25016	2.57599	1.78669	0	0.766803	2.76574	1.49053	1.50868	4.85544	4.03791	0.765266	0.781724	1.80468
SMG8	62.7022	64.7324	64.3288	64.43	67.8173	9.96294	10.753	15.2467	17.5622	13.6309	13.1183	9.2438	9.77913	10.402	12.1654	13.9406	17.2898	17.4666	16.772	16.6348
PRR11	239.02	235.463	233.135	228.462	234.602	94.5813	97.4045	86.796	97.7176	99.3229	74.0206	68.9982	73.4822	80.413	79.7237	69.148	81.8291	82.6059	87.4833	86.8594
STYXL1	17.0937	13.6455	16.7159	23.9198	18.0206	0.370886	1.51492	0.718827	1.64306	1.71001	0.812677	0.367486	0.660631	0	1.08173	1.54867	2.69468	0.732963	0	2.155
TMEM120A	0.826331	0.831903	2.42891	0.344855	0.713244	0	0	0.611672	0.349451	1.09112	1.38306	1.87626	2.24767	2.42181	2.45377	5.5995	9.82005	4.9892	7.98171	8.43155
POR	23.9674	27.6463	22.7379	25.4352	28.2888	1.73727	1.77514	3.44944	5.33542	3.30598	1.38376	2.73073	2.24546	3.51864	2.56352	2.51466	2.01934	1.81467	2.78981	2.79643
RHBDD2	37.9027	42.9663	30.4288	34.4637	35.2744	7.41411	8.88866	9.97975	8.90878	6.67597	5.64132	10.2041	10.601	8.95266	9.07066	12.0919	11.3498	15.8988	11.0689	17.1965
GABRR3	0.462256	0	0.580433	0.576571	0	0	0	0	0	0	0	0	0	0.253049	0	0	0	0	0	0
PHLDB2	3.49999	1.99529	1.99923	1.74958	1.32886	0.2157	0	0.103589	0.236517	0	0	0.105924	0.0950129	0.102358	0	0	0.110571	0.105584	0.216437	0.123961
ZDHHC20	18.1	19.3911	13.5529	16.6382	16.4581	3.60273	3.91027	2.17131	3.47202	1.2907	0.981904	0.222019	1.19599	1.28856	1.52346	0.935061	1.39271	0.442705	0.906966	0.520149
SMG6	21.541	24.9794	18.2033	27.7301	22.3889	10.9742	11.2879	8.87637	13.8233	11.8556	8.63471	11.3282	11.6727	11.827	9.92234	13.9929	14.8294	16.3405	14.2349	16.5458
OVCA2	2.61376	4.2048	2.17891	1.9467	3.13427	0.996316	0.407128	0.767924	0.657755	1.59753	0.868168	0.588911	0.881042	0.189844	0.577195	1.03334	1.23098	0.195706	0.801986	1.14951
RTN4RL1	0	0	0	0	0	0	0	0	0	0	0	0	0	0	0	0	0	0	0	0
HMGB1	120.089	124.125	108.012	101.925	109.516	323.042	339.069	320.038	313.879	314.822	338.184	320.652	341.028	346.758	332.287	341.235	348.117	367.962	366.642	335.077
KATNAL1	6.79797	9.53361	4.69923	5.99809	6.43785	15.9595	19.8571	16.1677	21.8424	21.0949	51.0452	53.8288	45.2439	54.5946	44.658	78.9586	76.2808	59.8962	60.5371	74.1425
SMYD4	14.0961	13.5531	12.817	13.6697	15.1337	2.97625	4.47158	3.5393	4.42655	2.60435	4.76345	4.48068	5.41321	5.16548	4.8975	7.07514	6.12185	6.01306	7.74526	6.65906
TPBGL	0	0	0	0	0	0	0.678817	0	1.10262	0.382529	0.363638	0.328874	0.591037	0	0.322609	1.03929	1.03299	1.31181	0.335753	0.38559
COA4	23.8446	29.2738	17.1766	27.8199	29.9401	17.5835	23.893	17.5159	14.7316	22.285	10.5625	7.16187	8.63998	15.1381	10.5976	15.1439	12.6441	4.76874	13.367	12.6871
UBL3	1.39003	0.69849	0.52011	0.344072	0.712461	5.8736	9.08256	5.04028	5.40646	9.98478	8.28829	11.7132	12.1926	12.6827	13.4666	26.9606	23.9813	30.9822	32.0662	27.0612
USPL1	122.135	122.487	106.22	110.612	117.107	23.2446	31.9267	26.3764	25.6067	22.5837	24.4189	25.3782	26.7644	28.8335	26.211	30.7308	25.7158	30.2715	29.5079	30.818
ALOX5AP	0	0	0	0	0	0.3266	0.333544	0	0	0.375834	0	0	0.290339	0	0	0	0	0	0	0
NIPBL	51.359	54.8708	39.8966	52.1303	55.4529	57.1044	58.2752	55.4397	64.3142	56.6351	69.8937	72.3436	65.8394	66.0303	61.264	77.0087	72.3217	82.1664	66.136	77.5487
SLC1A3	0.0640602	0	0	0.0787873	0.0816231	1.31316	0.670964	0.489924	0.639111	0.997984	0.632994	0.500975	0.513424	0.622239	0.560698	0.376532	0.597386	0.428001	0.658136	0.16746
RSF1	37.0414	35.2014	28.716	34.3274	37.963	48.528	51.3552	45.0714	51.4422	45.044	54.3511	50.4924	51.1026	52.0832	42.0201	56.897	47.0602	76.5086	44.4787	54.0313
UCP2	221.696	219.699	241.38	214.271	231.277	504.916	465.979	446.923	476.038	463.071	390.811	354.532	420.924	389.95	388.289	366.524	320.971	241.262	333.078	359.089
DNAJB13	0	0	0	0	0	0	0	0	0	0	0	0	0	0	0.23313	0.250396	0	0	0	0.278595
MRPL48	37.4759	43.1811	40.6494	33.0912	39.7184	9.78762	10.6129	13.7468	13.6757	12.807	5.40593	14.6656	13.7581	15.4205	19.2168	23.2005	19.2664	18.29	20.568	25.1349
RAB6A	35.0404	35.5397	35.6843	37.6428	34.2224	5.87456	4.11173	5.63727	9.16746	5.32227	4.45242	3.71134	5.94848	3.81441	5.80011	7.14592	10.1351	8.26425	7.10003	9.7009
PLEKHB1	0	0	0	0	0	0	0	0	0	0	0	0	0	0	0	0.175941	0	0	0	0
DHRS13	41.8579	42.9012	49.6901	41.6552	42.3352	53.6152	49.6413	59.6272	57.0476	61.9953	49.2523	48.1454	62.2141	55.7131	53.3716	41.6917	42.3402	24.0006	38.6001	39.7958
PHF12	11.91	9.93793	11.6151	11.5196	13.92	4.59543	2.13442	2.7082	2.29013	2.62239	6.23679	5.53853	5.97984	9.31628	7.23339	11.2255	12.8472	11.4504	12.0506	11.2825
SEZ6	0	0	0	0	0	0	0	0	0	0	0	0	0	0	0	0	0	0	0	0
MYO18A	0.069028	0.207844	0.0854451	0.381097	0.0438791	0	0.0401255	0	0	0	0	0	0.0344916	0.0371561	0.0753384	0.0404773	0.160499	0.191725	0.0786304	0.0449989
VEZF1	8.02571	12.228	15.5461	17.7301	13.313	18.9191	17.1773	11.9242	15.9402	14.178	13.4808	14.2677	23.0645	23.8464	15.7701	24.3132	21.4367	30.2624	12.4503	19.7583
CUEDC1	0.298319	0	0.186175	0	0.573828	1.02246	0.522301	0.656089	0.561896	0.974821	0.927164	1.17402	1.35463	1.94589	1.6435	1.94205	1.7522	1.00318	0.856576	1.96376
KSR1	25.4966	22.7068	17.1848	23.9211	21.3554	4.69975	5.45098	5.7378	7.24776	3.62724	2.20825	1.99732	2.2398	2.17169	2.81272	0.788298	1.17308	1.11992	1.27528	0.584445
NF1	5.68353	6.11126	4.58721	6.2054	6.12124	2.36999	2.04468	2.77175	2.1537	2.83767	1.50008	2.05035	1.70289	1.65972	1.85979	0.951651	1.22628	0.871485	1.07845	1.09319
LOC101927057	0	0	0	0	0	0	0	0	0	0	0	0	0	0	0	0	0	0	0	0
AKAP1	33.9584	33.2415	31.5093	29.6241	33.887	5.22878	7.06529	7.46758	8.34186	8.49032	2.38588	2.65593	1.63864	2.40736	1.46395	0.873682	0.520251	0.330961	0.339115	0.388715
MSI2	34.4831	33.1576	29.1275	31.235	30.3262	8.53981	8.35715	11.3264	11.7435	12.2246	2.22124	1.53635	3.07449	3.19799	1.85233	1.11941	1.35724	1.76706	1.20736	1.65981
BHLHA9	0	0	0	0	0	0	0	0	0	0	0	0	0	0	0	0	0	0	0	0
WSCD1	0	0	0	0	0	1.01548	0.86456	1.14027	1.30208	1.93625	1.28912	2.49848	1.79375	2.41564	4.57016	0.876684	0.870069	0.498147	0.510418	1.75523
USP25	102.626	110.346	91.3241	110.488	111.215	60.0691	73.8969	77.0218	83.4785	66.5207	45.3328	42.2212	47.9861	53.3421	46.1216	36.8245	39.5683	34.9619	33.8477	36.4802
NRIP1	104.469	101.795	85.9431	103.627	99.4061	5.23482	5.65514	5.02241	14.5778	5.54169	3.65011	3.52162	3.68438	5.03227	4.02361	8.18322	8.34422	10.8959	6.297	7.98278
SAMSN1	0	0	0	0.651812	0	3.28923	1.83239	7.80477	6.6053	5.15616	3.59484	3.84234	4.77932	9.15474	6.66704	2.1791	1.23726	2.35775	0.90534	2.77152
GDPD5	22.3398	19.1203	22.8161	22.4892	22.3807	0.269765	0.826896	0.77803	1.62856	0.154115	0.293195	0.530376	0.237921	0.512639	0.51961	0	0.276921	0	0.135454	0.310412
SERPINH1	0.190531	0.287066	0.355326	0.352418	0	3.80162	2.55271	4.90347	1.31014	2.10775	2.0051	2.24031	3.06216	3.60816	3.55294	7.2976	5.12268	3.40285	2.83379	3.99511
ACER3	0	0	0	0	0	2.54504	1.94787	1.86655	4.2713	0.740719	7.73779	2.54441	1.14597	4.94026	3.75139	2.01281	6.01876	2.53871	3.89254	7.4772
MMP1	0	0	0	0	0	0	0.138239	0.260143	0.148508	0.309182	0.14705	0.133003	0.119328	0.257111	0.260607	0	0.138888	0.397747	0.135872	0
MMP27	4.3087	3.19426	4.26988	4.24125	4.0953	43.9128	48.0387	44.1506	47.5693	57.5655	79.409	66.4332	80.1624	79.4202	74.6938	109.394	109.731	112.017	86.1737	100.685
ACAT1	150.254	148.253	164.218	148.97	150.77	10.5827	9.70757	13.1165	20.4499	10.3955	5.17829	4.2577	3.82235	4.3241	7.51221	3.3621	6.00866	3.18365	5.87035	3.9897
TMPRSS2	0.174425	0.175376	0	0.21652	0	0	0.203769	0.576527	0.219474	0	0	0.196502	0.176387	0	0.192593	0	0	0	0.401399	0.460271
DSCAM	2.05455	1.70159	2.29166	2.4611	2.87688	0.643134	1.25474	1.2334	2.17566	2.33153	0.190144	0.229314	0.411226	0.276876	0.336825	0.120639	0.11961	0.114279	0.175739	0.134126
PCP4	0	0	0	0	0	0	0	0.623204	0	0.741937	1.40918	0	0	0.618552	1.25252	0.67204	0.669859	0.63572	0.64982	0
IGSF5	2.13613	4.03182	2.35314	2.67251	1.03647	0	0.625887	0	0.677051	0.352339	0	0.302947	0.272165	0.29325	0	0.319085	1.26829	1.20833	0	0.71023
MIPEP	2.53571	2.84856	4.09585	3.88003	2.86914	3.40819	2.78561	2.9524	2.24758	5.459	3.33779	3.18662	3.61233	3.08099	4.27309	3.70755	5.25659	4.68153	7.02392	5.49853
RPS25	222.386	255.367	283.559	215.833	259.084	884.344	713.877	664.164	622.897	792.442	703.244	818.174	701.238	774.262	795.836	1229.05	1029.98	815.834	1251.98	1067.54
SLC17A2	7.15629	7.26278	5.29318	6.8421	7.76728	2.68891	3.54544	3.08036	3.80137	4.45189	3.01183	3.49035	3.66473	3.20773	4.16884	2.68748	2.30985	2.29106	3.21828	3.88474
GLB1L2	0.564244	0.284048	0	0	0.365455	0	0	0	0	0	0	0	0.575871	0.310246	0.314334	0.337552	0.670956	0	0	0
EI24	102.318	91.2999	90.5909	104.629	101.376	88.5677	94.2388	78.3493	93.4565	98.8835	49.897	55.7005	54.9874	52.8038	56.5274	36.5949	41.7048	41.0881	35.9584	37.8492
STT3A	123.563	137.252	131.635	137.782	135.879	89.6618	87.9587	94.6609	93.8672	107.8	84.5521	99.7482	97.1554	85.5601	90.5152	107.148	120.641	102.757	100.751	117.458
FOXRED1	6.09496	7.07795	3.8844	6.8708	7.46082	3.24786	3.16032	3.86839	2.5483	4.77474	3.53231	2.28204	3.27635	2.2061	2.83227	3.04262	4.13163	1.66827	1.8649	2.67165
DCPS	54.6109	66.6588	56.2809	57.9864	56.9258	71.0645	61.2311	74.3039	89.0549	84.6745	78.8156	79.2366	92.8354	83.6391	80.8189	57.6094	62.0548	59.7589	54.3193	60.713
KCNJ1	34.9505	36.7177	33.0524	38.2619	35.9469	18.7278	17.6333	16.4035	18.0947	14.125	7.99353	11.5671	9.87116	10.3559	7.08991	5.17761	8.17039	6.05528	7.67691	7.11766
KIRREL3	7.48856	11.7684	7.00656	6.51436	10.1212	1.90802	2.97583	3.37506	4.18314	2.52109	2.39838	2.66233	3.09547	2.38197	2.60771	3.83939	1.95549	3.14518	3.32452	3.34624
REXO2	111.837	114.915	111.787	107.935	114.073	61.5352	68.8573	80.6926	65.2888	63.2778	56.1091	50.0141	53.4859	57.2787	59.1023	49.2307	50.8602	54.246	52.1722	40.2464
GRAMD1B	0.987559	0.440946	1.09254	0.948302	0.561175	0	0.255803	0.120301	0	0	0.136004	0.123012	0.110356	0	0	0.388399	0	0.122621	0.12567	0.431936
GIT2	17.111	17.1796	14.0212	19.0859	18.6057	5.28861	5.54673	6.40818	7.54307	4.9177	3.24497	4.0272	5.69235	4.61566	5.94913	6.53582	5.83973	5.6468	4.74264	6.86753
PCNA	671.695	754.469	734.304	722.631	697.871	1506.07	1498.13	1554.26	1553.2	1622.65	1846.94	1744.8	1958.5	1945.61	1864.24	1817.7	1632.18	1236.96	1761.01	1708.29
BMP1	20.7597	22.404	19.2094	21.6721	22.816	3.52305	3.82488	2.43233	6.03654	2.8906	1.55425	1.18952	2.134	1.77648	1.37704	0.79663	1.01597	0.646746	1.10479	0.632766
ANTXR1	0.284927	0.143182	0	0.35274	0.182597	0	0	0.313158	0.178794	0	0	0.800532	0.287351	0	0.156884	0.5056	0.167252	0.319217	0	0.187453
AAK1	14.0035	14.668	12.1683	12.2791	15.1309	3.81879	3.00169	5.265	5.36637	3.24008	3.82643	2.30731	4.05271	4.64466	3.57823	3.7433	3.71267	3.54561	3.92893	4.16244
ANXA4	14.2123	17.2201	16.5627	17.7753	12.2559	5.43565	8.01891	9.3426	6.00429	6.94369	2.64057	4.4778	1.60907	2.02268	3.22053	0.943249	2.18695	4.16733	1.82877	1.39965
BRF2	38.5251	47.0876	43.9828	34.6671	40.8766	6.0632	8.25869	5.4527	5.7825	7.408	5.72416	5.77459	5.89854	6.74015	5.65981	6.91807	7.07604	4.76444	11.1856	11.6605
GPAT4	33.93	37.267	37.8663	31.5502	34.3155	91.4099	91.8876	87.8058	80.4983	80.9877	83.4345	97.0245	89.9557	92.4028	88.9235	65.7164	67.0661	50.206	61.3058	66.689
CABP1	0	0.597666	0	0.372206	0.384835	0	0	0	0	0	0	0	0	0	0	0	0	0	0	0
GGT5	0	0.172098	0	0.105567	0	0	0	0	0	0.111423	0	0	0	0	0.187816	0	0	0	0	0
GGT1	1.03308	1.48337	0.920931	1.27951	1.89232	0.674394	0.861254	0.324538	0	0.192879	0.366902	0.497773	0	0.160422	0.162591	0	0	0	0	0
LRRC75B	0.26339	0.265125	0.331509	0.658851	0	0.30221	0.308655	0.584362	0	0	0	0.89625	0	0	0.586002	0.314659	0.312663	0	0	0
RNF34	0	0	0	0	0.108782	0.0971503	0	0.186557	0	0	0.105454	0	0.0855492	0.0921621	0	0	0	0	0	0
KDM2B	4.26429	5.57305	3.02351	3.41421	3.79579	0.770945	0.945389	0.221916	0.844367	0.439497	0.58539	0.453843	0.746157	0.292299	0.592622	0.636746	0.710343	0.829328	0.618293	0.884978
ORAI1	42.8567	45.0123	40.1962	37.6577	41.7132	17.2384	20.1187	28.2782	26.4756	21.8818	12.711	10.4507	15.3406	14.1682	15.7211	9.17458	14.5929	6.60044	9.24611	13.8889
MORN3	0	0.376195	0	0	0	0	0	0	0.477308	0.496732	0	0	0.383905	0	0	0	0.895109	0.851567	0	0.500936
TMEM120B	68.5237	61.3369	65.5077	60.1268	76.0263	7.75395	7.48094	10.1738	9.24839	11.1075	3.99046	2.12303	3.81188	4.92829	2.49721	2.68232	1.55353	0.84665	3.03557	2.48673
ESS2	34.9326	32.3193	39.9442	38.373	41.7878	17.8654	18.5936	17.6758	24.5876	15.662	22.7081	26.4537	24.7718	32.5658	27.0491	35.6297	36.5617	33.415	30.714	32.3199
RHOF	2.2532	1.76375	2.83323	3.12778	3.55873	0.574229	0.586495	0.554888	0.950914	0.659822	0.627328	1.41842	0.509639	0	0.278197	2.39016	1.78101	4.24297	2.8966	3.3248
SETD1B	14.5125	13.0203	10.0744	12.6666	13.0159	7.55072	7.31831	6.44416	6.12911	5.54836	7.97154	8.45184	8.04864	8.99332	8.13545	8.89244	12.103	11.5173	9.27087	10.333
DGCR2	8.26859	10.153	11.3601	10.8238	10.4562	8.06023	6.2988	6.04215	7.63822	8.41472	8.74047	9.43376	8.99549	8.9205	10.4744	13.7012	10.7435	12.7136	13.1693	12.9018
STAMBP	37.4286	40.3407	33.5865	49.3466	49.5433	5.15214	4.56188	6.28171	8.49456	9.43169	3.73773	1.69032	2.42713	3.26861	4.63791	2.84696	3.70852	3.03315	3.45315	3.56252
DUSP11	30.9843	27.9943	26.8041	30.4001	27.0722	33.4042	33.7988	35.1363	38.5755	31.5254	28.2074	29.3889	29.8318	29.6413	30.8385	23.7887	27.5505	26.9594	21.366	29.1902
CASP1	0	0	0	0	0	0	0	1.23225	0	0	0	0.629909	0	1.22297	0	0	0	0	0	0
TCF7L1	78.1707	72.948	68.2939	80.7764	72.432	87.9882	79.4062	76.4035	84.1176	84.6288	201.104	186.943	190.37	197.9	184.32	196.899	192.44	253.105	166.815	190.518
DBNL	0	0.627641	0	0.386937	0.200276	1.60543	1.64017	1.20219	0.588357	1.8373	2.91239	4.21461	2.83691	3.90539	3.78603	13.3102	12.8439	12.7799	11.4798	15.8335
COX5B	355.312	358.285	370.752	310.422	275.295	466.164	462.593	512.109	505.801	450.176	526.534	509.13	478.492	519.073	501.95	568.792	572.514	374.586	672.586	488.799
ACTR1B	118.739	120.081	113.054	128.896	125.736	77.5338	82.8064	88.1582	82.2639	72.9875	67.4157	67.7316	66.4027	68.6715	65.8861	76.8491	72.6526	68.8357	73.5621	85.8639
KCTD9	59.2012	68.7006	72.578	70.0158	61.6408	49.8031	56.4587	62.6406	56.1617	63.4835	49.6026	50.537	50.4875	52.0437	38.9553	25.0455	30.252	20.4793	20.9727	22.4858
FGFR1	16.664	25.9616	20.1252	22.6838	23.6527	34.3609	42.038	39.8554	40.3246	32.8727	38.4835	41.6236	46.7169	52.7133	33.1087	48.2385	54.6814	38.746	33.9269	53.8204
STC1	0	0	0	0	0	0	0	0	0	0	0	0	0	0	0.339018	0	0	0	0	0
RHOBTB2	5.53064	6.27152	7.09485	8.35562	5.92152	2.94882	2.38978	1.75763	2.11795	2.20476	1.10391	0.599086	1.16425	2.0261	0.978	0.315228	0.10422	0.895733	0.816099	0.467373
WDR45	9.86412	10.6345	8.55451	8.79099	10.3067	18.0355	14.5723	15.0778	17.8185	14.2188	27.6265	24.9861	23.6343	28.0367	30.4947	31.0716	24.1917	24.3831	27.4139	30.837
ZCCHC9	73.3124	73.5278	77.4661	69.1594	78.8491	39.3748	36.7138	45.7439	42.0458	37.0581	42.7219	56.9395	42.9451	47.9142	42.2263	54.2692	48.6214	56.1049	44.2885	53.2527
ACOT12	0.838969	1.26588	0.788855	0.522276	0.810607	0.48034	0.735987	0.463425	0.529344	0.550976	0.785883	0.236927	0.850966	1.60448	2.09047	2.74426	0.743265	0.472445	0.241955	2.22058
ATG10	6.44712	13.2642	14.483	10.1817	12.3439	2.89646	5.58749	4.67033	5.33649	4.81362	2.46403	1.91012	1.14417	1.54102	1.24907	0	1.33307	0.317455	2.60019	1.49289
TMEM167A	15.0601	19.6221	20.4984	18.5401	14.368	22.4252	29.8086	19.3055	24.886	28.3421	32.0427	35.6979	29.4569	26.4515	28.443	36.733	37.8614	30.5773	51.0072	37.451
XRCC4	69.1625	77.7648	66.133	62.4855	66.4779	40.0462	36.5033	34.9115	39.5266	36.9486	15.2084	19.3217	20.0103	17.1219	21.8446	3.10471	3.77157	5.55165	4.01206	3.45563
VCAN	0.514559	0.516641	0.319155	0.395542	0.245867	0.07325	0.0748544	0.0702742	0	0.0835042	0.0794466	0.0718593	0.193319	0.138839	0	0	0	0.0716241	0.146848	0.0840712
HAPLN1	0	0	0.0917838	0	0	0	0	0.0808414	0.0922805	0.0960643	0.182786	0.165329	0	0	0.161921	1.47878	2.15661	0.741561	1.68923	0.967216
EDIL3	0	0	0	0	0	0	0	0	0	0	0	0	0	0	0	0	0	0	0	0
RASA1	12.8609	14.3006	12.4462	16.7232	10.839	3.14543	2.62215	3.01861	3.62708	2.73746	1.07767	0.731058	1.0927	1.09868	1.11375	1.0257	1.52576	2.02411	0.580964	0.760322
CETN3	22.328	21.4911	18.4187	17.7886	18.2297	3.3451	3.41825	3.12631	2.41131	2.10854	3.05675	4.57921	3.56445	3.33909	3.13098	5.72792	3.51652	4.56435	5.12009	5.35806
ARRDC3	1.18452	1.71937	1.47659	1.13953	1.51697	38.6182	34.2366	29.9187	37.9573	32.1245	36.2751	43.894	41.3747	41.003	35.9118	35.7792	40.4427	34.1801	34.8745	37.0256
NR2F1	15.9439	12.6844	12.0918	17.2573	13.4436	0.910213	0.619979	1.02147	2.16605	0.520323	0	0.149212	0.267775	0.432728	0.584795	0	0	0	0	0.174682
MCTP1	0.291617	0.409886	0.72319	0.501882	0.89138	0	0.0678619	0	0.145402	0	0	0	0.116805	0	0	0.411186	0.271803	0.324583	0.1331	0.380974
SEPTIN5	0	0	0.376377	0	0.386853	0	0	0	0	0	0	0	0	0	0	0	0	0	0.346306	0
CLDN5	5.86361	6.13608	3.82954	4.38947	2.72452	0.537642	0.274576	0.259606	3.55883	0.926042	0.880491	2.65446	0	0.770595	0.780844	2.51587	1.6661	1.32335	1.35527	2.48846
ACADS	26.199	33.6201	29.597	28.2031	31.0365	22.0436	17.4492	21.0266	20.3723	22.1536	29.7897	31.0247	28.8432	18.4355	22.4165	28.6606	33.0273	27.1355	30.5679	30.936
CRYBB1	1.35242	1.81944	1.72593	1.71884	1.77475	2.60465	3.1905	1.5222	1.16053	1.20766	1.72097	0	1.40058	5.53423	1.01903	0.546907	1.63361	1.03499	1.05859	0
CRYBA4	0	0.64149	0	1.63822	1.68869	1.47619	0.753019	2.89716	1.65815	0.862581	0	0	1.3351	1.43902	0	0	2.33871	1.4779	1.50989	0.871161
GRK3	48.0222	58.4721	43.1184	52.1769	65.6729	19.3858	29.7082	32.4898	39.0034	25.35	12.9971	11.4146	13.3019	16.6371	14.3577	22.7764	22.9613	21.5697	12.0074	23.3396
ZSWIM6	2.82627	2.12973	2.3464	3.34619	3.0131	1.74694	3.15796	0.904303	2.06495	0.76769	0.584195	0.792585	0.474058	1.91519	1.16474	1.6684	2.20706	1.18512	2.02421	3.55636
SBNO1	51.8721	58.7038	49.9964	61.225	66.3012	63.9538	73.9638	65.4447	77.7614	66.2779	66.2178	72.0298	76.8197	80.4457	70.267	78.6787	70.5724	71.0095	50.2477	73.487
SNRNP35	55.0181	74.0741	66.4807	69.4813	74.247	48.2001	43.8916	55.2439	47.7269	48.6655	42.4326	41.3926	46.5308	43.0372	41.0542	35.4422	33.9041	33.1134	31.2431	30.3577
DENR	196.112	171.187	181.99	193.107	192.168	213.136	213.454	191.751	193.369	193.701	149.153	148.257	139.492	146.386	151.07	143.843	129.061	176.141	124.86	128.788
DUSP26	2.42218	0.818374	7.40928	5.29365	1.08958	0.945797	4.82212	0.934779	4.28397	2.22813	2.11378	1.91119	0	0	0	1.00929	2.01797	1.90802	0	0
HIP1R	1.56134	2.52201	2.27428	2.25498	2.24954	23.5053	22.2816	20.5503	25.2359	24.0669	25.2456	24.5035	24.4233	27.5567	28.1578	22.112	23.3518	24.3479	19.0682	24.7633
CLIP1	9.2722	10.8487	9.33863	11.4641	13.9843	3.91477	2.66654	3.48593	4.29862	5.63474	1.10347	1.28321	1.53515	1.65388	0.838165	0.900435	0.446722	0.568524	0	0.333816
NPM2	130.607	138.715	138.52	120.911	144.691	86.4752	89.3576	93.6445	80.5416	109.8	72.9496	77.4787	79.0511	69.4524	72.0244	52.036	45.702	39.4749	44.9021	48.0023
SEZ6L	12.1115	11.313	11.5826	12.4464	12.1272	3.91088	3.29543	4.93607	4.95806	3.59736	2.23214	1.74977	2.23287	1.56027	2.30667	0.637319	0.631936	0.469547	0.756419	0.393664
TPST2	0.125555	0	0	0	0	0	0.146429	0	0.314714	0	0	0	0.126441	0	0	0	0	0.280959	0.287917	0
UBC	1488.33	1481.45	1734.94	1545.55	1438.69	2039.62	2184.1	2189.5	2132.76	2362.62	2972.81	2764.62	2774.6	3049.48	3078.31	2303.27	2333.14	1929.36	2351.38	2121.39
SCARB1	69.0272	66.664	71.973	72.0815	67.3924	21.2025	24.3312	19.0661	21.4327	21.2562	20.7194	21.4603	17.6293	26.4438	21.7676	33.0881	37.0959	29.9806	27.9428	32.2011
TACR1	0	0	0	0	0	0	0	0	0	0	0	0	0	0	0	0.316611	0.314608	0	0	0.352358
SLC4A5	0.401555	0.287961	0.569005	0.0705136	0.584446	0.326563	0.200233	0.438498	0.500506	0.446603	0.141638	0.192167	0.287191	0.18563	0.627275	0.134799	0.200485	0.25538	0.130904	0.449619
VPS37B	44.3477	48.6333	45.9587	52.6218	48.2665	5.83018	8.24169	6.1005	4.48354	4.14748	3.44852	4.00973	6.01065	3.0226	3.06158	7.04314	7.4751	5.77683	5.00139	3.13721
TUBA3D	0	0	0	0	0	0.24736	0	0.238708	0	0	0.269869	0	0	0.236145	0	0	0.510516	0	0.249253	0.285968
SEC14L2	0	0.114339	0.141685	0.140555	0.145552	1.16863	1.06139	0.499242	1.13999	0.296671	0.423306	0.382871	0.114497	0.370051	1.00023	0.537289	0.399784	0.636094	0.521515	0.448145
CNNM4	1.77027	1.27264	0.318055	1.58009	0.653731	0	0.592496	0.280313	0.320252	0	0	0	1.02984	0.277402	0.281079	0	0	0	0	0
IL1B	1.43627	2.0638	0.771442	2.04288	1.84964	3.7585	2.63951	3.8521	4.14112	1.34699	1.0247	2.31694	1.87231	2.24138	2.27136	0.243962	1.93813	2.77203	1.41969	2.44287
PURB	15.2596	16.0092	12.8527	17.6541	19.3896	100.877	107.123	109.887	108.456	112.887	98.3507	73.6745	104.217	115.385	100.739	39.1794	54.6318	36.3599	47.3054	56.8733
POLM	26.0933	32.4144	25.611	25.2345	26.1245	6.53092	6.67242	6.60784	9.01774	5.55548	3.46189	2.63676	2.95781	1.75264	3.06823	2.08169	1.72163	1.97143	1.85168	3.08724
ARSF	51.7133	53.3942	45.5609	52.3315	61.7458	34.6566	45.5173	33.2021	42.3839	44.6325	38.2724	49.4818	54.984	63.5327	55.0309	52.0998	54.9807	61.5009	31.4991	50.4255
MRPS24	24.5587	31.2044	32.5786	35.7664	40.2217	60.0766	66.5243	73.3179	59.2399	69.3385	71.5161	69.0771	66.2465	69.2603	62.8807	79.0936	85.097	52.0676	98.1504	82.1297
NUDCD3	37.1601	45.7732	43.4887	41.2641	43.6861	119.845	125.142	111.817	128.082	120.973	176.589	196.248	170.208	180.541	182.641	189.005	181.632	150.437	175.705	190.653
CAMK2B	0.270992	0.54467	0	0.335292	0.347151	0.773602	0.316155	0.297685	1.01972	0.707646	0.168271	0.304392	0.546272	0.441393	0.447376	0.640804	0	0.30344	0.310938	0.356359
OGDH	3.97048	5.44584	5.19972	4.87996	3.84537	4.52032	3.123	3.35832	4.18167	3.62767	3.31344	3.93358	3.91907	4.76472	4.40227	9.52605	9.44518	10.8284	9.18711	9.05732
ZMIZ2	22.6152	24.4933	20.7333	28.3309	24.4023	16.2348	18.26	16.6915	19.3328	15.0936	17.0925	19.6649	23.5223	26.7755	16.4779	27.856	28.0224	28.2324	13.3931	26.491
PPIA	38.3502	37.527	42.3661	47.0637	39.4744	78.4094	88.0717	83.9477	78.3215	83.1681	145.957	129.096	152.77	156.25	180.865	233.619	250.501	212.312	317.671	228.209
MYG1	38.125	55.2854	44.6401	58.3699	43.1188	55.9871	70.3038	68.9271	73.3454	71.0615	66.5545	53.2356	70.109	71.1484	64.079	67.8591	85.7924	68.1644	81.2219	74.8121
SP1	94.0552	115.989	119.192	138.977	130.913	99.7792	104.154	114.979	110.113	109.385	79.8684	69.7206	82.0547	84.044	83.1091	33.7611	38.4788	33.2966	33.9874	33.3578
COL2A1	0.754952	0.551308	0.255494	0.33777	0.437392	0.390867	1.19827	1.27517	0.770596	0.802198	2.12001	3.37488	1.85719	2.22302	2.70423	0.968524	1.04046	1.37613	1.3323	1.97429
ELMO2	2.26584	1.95109	1.87978	3.06337	2.069	1.7231	1.76062	1.53759	1.35034	1.96793	1.20343	0.362827	0.867976	1.05197	1.06631	0.509147	0.126274	0.241115	0.247112	0.141554
DUSP7	6.58373	5.29135	7.1015	6.36717	6.45351	5.50775	3.58124	4.45113	5.49387	4.14623	3.53609	4.55146	4.19352	3.80444	3.25371	7.89745	8.22006	9.19659	9.67658	10.6544
CDK4	4.43338	7.27816	7.40099	6.94104	8.84701	15.5417	14.3677	11.0238	11.6384	14.0874	19.9671	20.6052	22.1818	16.9856	16.742	23.9823	23.0321	18.1232	20.5551	20.2865
NCKAP1L	1.06477	1.16675	1.44432	1.19377	1.48368	1.21408	1.46612	2.43845	2.29965	2.51989	1.79787	1.95137	1.75039	2.30477	1.59288	1.48318	1.92388	1.62093	1.5506	1.14184
TMBIM6	79.1761	74.8371	88.5235	86.0443	80.6837	97.2218	97.0357	92.7302	92.1466	101.684	96.7082	105.476	85.5984	91.3329	101.209	88.986	95.2411	70.8957	102.854	100.276
AVIL	0	0	0	0	0	0	0	0.402206	0	0	0.151569	0	0	0.132511	0	0	0	0	0	0
ALAS1	237.527	275.231	314.546	312.062	288.433	335.738	279.346	314.986	304.802	314.332	350.758	342.47	324.62	352.591	368.864	189.029	201.962	164.954	209.99	195.026
SLC11A2	55.924	65.843	70.2259	70.3382	64.9801	57.1764	65.4633	64.9694	64.5381	64.1206	52.8382	57.7659	51.644	55.6431	56.641	47.5601	37.9041	29.0603	41.559	37.5374
METTL1	20.1287	26.014	22.2674	25.8746	21.8292	23.7274	23.9139	22.0419	22.0798	26.5714	23.8954	22.8461	22.7447	20.3227	24.8304	21.137	26.1753	20.3184	26.7928	28.591
POC1A	4.68975	6.62622	6.59237	8.35766	6.77922	6.5076	11.0707	13.7436	5.44107	18.8731	18.5264	16.7537	14.5934	23.066	19.1115	28.4903	24.4004	19.948	19.8492	23.4863
CYP27B1	0.347288	0	0.217123	0.646609	0	0	0	0.191304	0.655432	0	0	0.195611	0.351172	0	0.383437	0.205938	0.408876	0.195015	0	0.22909
ISY1-RAB43	49.0915	51.8769	50.2738	50.7476	60.9039	79.6148	82.8961	75.3731	83.7518	81.7346	71.8102	74.8995	72.6252	79.4558	71.9142	67.1529	54.0794	69.9868	55.141	64.3726
PDRG1	7.41533	7.79407	6.95145	5.64567	8.65733	4.43165	4.13369	3.71195	2.75542	5.51565	1.25895	3.41598	3.23648	2.38578	1.48795	5.39434	4.7598	3.21634	5.03969	4.66717
ZNF831	0	0.129065	0.0797298	0.0790499	0.081895	0.0731959	0.149598	0.351111	0.240465	0.750982	0.0793878	0.143612	0.128784	0.0693681	0	0.151114	0	0.143142	0.0733697	0
NUF2	35.3656	36.0529	31.848	34.2489	42.6369	69.5962	73.5378	72.8704	67.0667	69.8058	113.241	130.589	128.16	129.423	103.264	110.628	102.73	126.795	101.087	111.993
RAB43	41.3679	39.1956	35.4568	41.2194	40.5797	11.2288	8.45096	10.7008	10.5527	8.39048	5.84301	4.46619	3.13734	4.38656	4.51967	1.87982	1.94173	1.70644	1.21691	1.56759
CNBP	28.2456	23.879	24.9815	26.5882	27.7493	117.704	124.868	97.762	112.331	121.404	142.134	156.534	146.888	142.371	144.881	206.003	193.92	201.139	202.328	225.608
RAF1	118.247	126.528	116.599	145.143	138.15	49.8861	42.0405	39.4375	55.3299	46.1487	43.8942	42.0453	45.5837	45.6341	42.4234	32.2471	31.8376	40.3561	35.4449	39.7096
MKRN2	32.398	42.1136	38.0872	36.1917	42.268	14.9671	15.1234	16.9356	19.8807	18.2487	11.6309	7.60659	10.6022	10.1705	7.61218	8.51809	8.62252	7.09893	9.91906	7.39004
MKRN2OS	0	0.171763	0	0	0	0	0	0	0.2149	0.22369	0	0	0	0	0	0	0	0.575471	0.393046	0
TSEN2	98.3727	84.3835	103.851	74.1919	91.6741	20.5826	10.8401	18.8465	15.6169	16.2491	9.55179	12.6239	8.97934	11.6132	7.83816	14.7185	13.9757	15.911	14.229	7.81185
PPARG	11.11	9.47879	9.10497	13.5682	16.5305	1.93824	4.80783	2.67473	2.44453	2.2263	3.02391	3.00837	2.21078	1.32333	0.268182	1.15208	0.572256	0.818082	1.3963	0.320504
TIMP4	0	0	0	0	0	0	0	0	0	0	0	0	0	0	0	0	0	0	0	0
VGLL4	8.04853	9.16802	8.39211	10.4011	9.48209	14.4825	13.2252	13.6003	15.5242	12.472	14.122	15.4186	14.1659	15.6988	16.2844	18.6898	17.587	17.9297	18.6116	20.6924
TAMM41	2.51565	5.43283	5.46639	6.34444	4.21465	2.06922	1.26766	0.803257	1.83638	2.38892	4.99474	9.44481	3.69235	3.97872	3.62731	7.35618	6.4562	4.09554	5.02946	6.26327
ATG7	11.7498	15.9746	13.7328	15.9957	17.4722	8.08602	8.85243	9.54423	8.36216	10.6832	5.89687	5.90102	6.00605	7.56708	7.11448	5.4938	5.80511	4.63785	4.75339	7.70312
SLC6A1	0.337906	0.33936	0.314838	0.104075	0.215604	0.192555	0.0983809	0	0.105523	0.109849	0	0.189045	0.339111	0.273993	0.0925807	0.298409	0	0.188434	0.193147	0
SLC6A11	0.363151	0.729319	0.45076	0.446958	0.277807	0.24822	1.0146	0.555827	0.181278	0.188711	0.179536	0.162389	0.145633	0	0.15904	0.0854396	0	0.0809303	0	0
ATP2B2	2.53691	2.10591	2.41809	2.69668	2.23528	0.721864	0.794455	0.638886	0.546901	0.6326	0.240758	0.272208	0.195255	0.578438	0.746334	0.114563	0.227164	0.651142	0.333782	0.509475
IARS1	6.97373	8.93982	5.81678	6.78699	7.7326	9.72845	7.69608	8.63983	8.71632	9.19295	13.402	11.8137	12.9001	13.401	12.2761	20.9731	23.269	14.6429	16.6878	25.3658
RPL29	147.887	128.126	150.11	119.473	121.555	282.348	282.287	236.601	188.066	259.184	206.72	207.353	169.978	183.566	183.084	265.451	226.954	271.171	298.321	231.076
FAM217A	3.61338	7.48349	7.72933	7.14687	6.84701	1.21706	1.2432	0.469734	0.804837	0.558483	0.265527	0.240152	0.215643	0	0.470882	1.51726	0.251138	0	0	0.281359
PPP1R3D	0.271586	0	0	1.01974	0.351525	0	0	0	0	0	0.34082	0	0	0	0	0	0	0	0	0.361335
PHACTR3	1.1411	0.716789	0.889755	1.05953	1.09694	0.977516	0.332902	0.156773	0.537046	0.372686	0	0.32061	1.00698	0.619925	0.314158	0.843711	0.669838	0.159806	0.491244	0.750743
ACOT8	3.65164	3.1505	3.6105	5.21848	3.37327	0.299246	0.611258	0.578572	0	0.344006	0	0	0	0	0	0	0.928659	0.589886	0	0.693409
SRSF6	56.8341	52.0556	46.9222	57.8886	58.216	174.091	204.792	167.391	189.275	184.239	181.862	195.282	192.09	211.468	206.552	204.414	219.525	247.992	167.809	239.927
IFT52	24.9851	29.4128	33.7122	28.4164	26.4163	11.9689	8.37749	11.5402	10.984	13.7196	15.4628	19.2296	17.8527	16.6981	18.6356	27.149	22.6165	20.0433	31.9133	29.4362
MYBL2	38.8199	42.2873	36.2582	38.5237	36.7329	71.1065	70.7928	59.047	74.6153	79.7596	86.4927	88.0109	109.269	113.034	115.549	111.969	103.556	94.4326	93.9553	105.188
DTX3L	0.99817	1.33801	0.62372	0.619112	1.28168	0.950928	0.971475	0.915895	1.88272	0.653247	0.828363	1.49843	0.84059	1.08676	0.917835	0	0.195734	0.373461	0.573931	0.219346
DTX3L	33.4143	29.8091	30.0925	34.889	29.2937	3.22899	4.25478	3.99613	5.58563	4.26408	1.84397	1.91804	3.36551	3.22278	1.71515	1.05304	0.870252	0.581852	0.766849	0.780594
DTX3L	1.96482	2.67079	1.87081	1.42763	1.62621	0.659388	0.40424	0.887389	0.289473	0.90399	1.00322	0.907388	0.116296	0.375866	0.380979	0.272864	0.676783	0.258433	0.264849	0
LRP1	0.142278	0.309357	0.117319	0.174399	0.240983	0.134821	0.192906	0.0774861	0.176859	0.245493	0.0583995	0.15847	0.284113	0.127524	0.0517154	0.0555721	0.0550822	0.0789691	0.0269908	0.0617768
FAIM2	1.24745	1.57055	1.18176	2.34998	2.0245	2.50938	2.56253	2.77798	1.19052	1.65205	0.785166	0.355048	1.91462	2.06303	0.696686	0.374044	1.48745	0.354069	1.08733	0.416368
RARG	1.45162	3.96326	0.779816	1.03256	2.40394	1.18719	0.48508	0.229056	1.30817	0	0.517915	0	0.210298	1.13289	0	0.246615	0	0.233513	0.239183	0
HOXD11	0.563333	2.26871	1.06497	2.11699	0.364852	0	0.330282	0.938687	0.715056	0	0	0	0.574919	0.309733	0.941445	0	0	0	0	0
CALCOCO1	0.117642	0	0	0	0	0.268487	0	0	0	0.306763	0.1459	0	0.118394	0	0.129284	0.138892	0.4134	0	0.269619	0.308932
ZNF771	12.1713	13.2308	13.3747	30.1102	56.6254	0	8.94568	36.6889	0	30.329	0	12.4566	0	0	0	13.8325	0	0	12.2326	0
SERINC3	3.1729	2.81532	2.33596	2.31924	4.80043	0	0	0	0.940316	0.489382	0	0	0.188938	0	0.206293	0.443171	0	0	0	0.493024
SLC2A10	28.0134	26.027	24.7633	24.9514	26.8014	12.2838	10.959	14.8222	15.024	12.8674	23.1585	21.1163	24.911	29.4726	28.7027	27.0687	29.7121	24.1067	28.5269	25.5227
CSNK2A1	0.338972	0.255324	0	0	0.324433	0.482912	0.394769	0	0	0.110198	0.419341	0.0948225	0.0850472	0.0916213	0.278625	0.798285	0.296903	0.189032	0.29064	0.110958
UBE2V1	51.2856	67.9509	65.9129	71.4499	54.6747	94.1602	93.6115	88.9733	87.9596	86.7727	109.652	95.8878	89.534	88.9346	99.3388	77.7242	96.6374	93.5896	104.559	78.3654
PIP4K2C	0	0	0	0	0	0.176241	0.72022	0.509004	0.19375	0.605037	0.191816	0.346979	0.622806	0.167747	0.170013	0	0.181264	0.172954	0	0
NABP2	0.737178	0.832976	1.03085	0.113598	0.588294	0.945453	0.966085	0.504452	0.575882	0.599485	1.59683	0.41266	1.75818	0.996895	1.71788	1.7371	1.50762	1.95383	2.95122	2.77676
CNPY2	17.9831	24.3006	19.9188	20.3046	18.4804	3.96896	4.05219	5.56885	5.87666	3.56752	5.32735	4.81783	6.30246	3.82017	3.8695	11.5395	7.80706	6.55265	9.8337	13.3636
TANK	0	0.0743722	0	0.182333	0.188879	0	0	0	0.0924381	0.0962284	0.183098	0.0828057	0.148524	0.160004	0.162197	0	0.259235	0.330145	0.338423	0.193774
NAB2	0.942052	1.10481	0.784337	0.778459	2.61899	3.05031	0.91656	0.863785	1.77552	1.64282	1.56246	0.706592	2.53664	1.70806	1.90423	2.78938	1.84572	2.99376	2.34562	1.44794
INPP1	1.01576	1.57673	0.918267	1.25224	1.76864	0.736914	0.537854	0.909949	0.692532	0.360458	0.114302	0.310155	0.370933	0.599413	0.405069	0.544001	0.755418	0.309158	1.2675	0.362959
HIPK1	97.3555	97.2881	81.6172	100.157	99.9728	83.6638	91.4242	85.8828	105.282	88.7103	64.5872	67.5457	70.559	84.7204	91.2385	73.3116	83.0593	83.4996	59.1364	77.3512
B3GALT6	15.071	18.2003	11.2603	15.1479	14.659	6.34014	6.16507	5.5975	7.06266	4.78473	2.33141	3.01248	4.2332	4.85153	4.8195	4.43832	3.8781	2.20204	3.18038	6.11046
TMEM167B	44.6239	40.9516	44.0732	47.2707	40.5056	21.2645	21.1027	21.8556	28.7492	20.182	13.8986	14.965	13.9707	17.3675	15.2543	13.6546	15.0155	11.3388	12.8389	19.1627
MAPK14	57.1134	50.0784	50.2039	58.1941	55.5922	14.7629	15.9286	18.9092	16.2496	14.1821	6.25876	5.80808	6.92261	6.96043	6.552	5.64736	6.13697	7.40124	6.68572	6.1931
SRPK1	86.6655	99.0212	91.6796	92.9504	92.9784	43.6591	37.0467	43.0791	53.7568	44.8065	24.1548	26.4651	25.9842	26.4488	23.6726	26.9252	29.6941	34.1747	21.9522	31.1979
LHFPL5	0	0	0	0	0	0	0	0	0	0	0	0	0	0	0	0	0	0	0	0
KIF21B	11.0158	10.5771	9.31238	12.4524	12.3736	2.35262	2.80481	2.33269	4.12289	2.77189	0.850696	0.538616	1.24206	1.11504	0.75356	0.809664	1.04377	1.07372	0.628954	1.17033
CPNE5	5.34121	8.5195	5.53136	5.03397	6.63072	3.79253	1.93714	6.49838	5.56636	2.89699	0.918335	1.86882	2.42329	2.00833	1.62824	0.218619	0.217051	0.414036	0	0.729628
TIMELESS	96.2634	106.639	84.5326	103.624	111.208	61.9522	67.2208	63.692	70.8639	67.053	59.4298	65.6786	61.2099	62.2187	60.9142	49.7129	54.2823	53.7626	45.2673	54.4196
PMEL	0.116193	0.11674	0	0	0	1.98875	1.2192	2.16667	1.30963	1.51475	0.432261	0.651617	1.16921	1.25962	1.40444	0.548661	1.08868	0.389732	1.19822	0.915271
PRPH	0	0	0	0	0	3.38189	4.60736	4.2132	1.78664	2.0029	3.81052	1.96945	3.4232	2.61721	3.01461	1.55458	2.05632	2.08588	1.2575	1.72884
CDK2	208.907	203.635	198.893	181.686	196.32	60.636	67.5473	72.3163	88.3897	69.0014	57.0214	56.9884	58.9941	59.4604	65.1033	59.0151	52.9431	40.6185	57.2362	57.66
SARNP	429.812	429.871	454.017	400.468	392.863	520.578	556.27	584.749	499.537	551.712	499.622	571.613	479.842	492.837	444.555	404.179	371.399	459.68	426.808	390.826
TUBA1B	0.197819	0.0993533	0	0	0	1.01509	0.691483	0.541749	0.989568	0.386295	0.367477	0.88634	0.795067	0.642402	0.759697	1.39919	0.925285	0.662626	0.452762	0.777977
MCRS1	92.5328	97.8566	95.3795	83.4559	99.1529	67.4966	59.2829	67.1252	70.5951	63.0428	101.745	108.633	93.2332	99.4626	91.8389	86.7031	88.53	74.1691	86.2085	80.1685
ACAP3	69.1884	80.0209	73.6944	75.3787	71.1492	4.58977	4.42165	4.53795	8.63513	4.79405	2.28013	1.41785	2.31277	1.12122	2.52551	0.813967	1.21132	0.642433	0.790063	0.452615
PUSL1	8.06422	11.7584	10.1608	6.96458	9.36269	2.87315	0.652064	2.7794	2.1172	1.10179	1.39656	1.26305	1.13483	2.13983	1.54861	5.32164	9.91633	5.03793	5.4805	7.40355
DDX19B	356.146	368.873	324.037	350.963	344.467	449.134	478.517	475.215	483.769	455.207	477.55	523.634	501.278	499.57	439.81	348.42	325.327	311.815	289.3	339.04
CAMK2N1	0	0.270448	0	0	0	1.84991	1.25955	1.19259	2.72524	1.06367	2.69658	1.52425	1.09552	1.47549	2.39197	4.81639	5.74333	6.38364	2.49001	3.21617
CDA	0	0	0	0	0	0	0	0	0	0	0	0	0	0	0	0	0	0	0	0
DNAJC16	18.1493	17.111	14.2698	15.5127	15.982	3.86631	4.03158	3.25567	2.59274	2.42916	5.73491	5.34205	6.2487	4.93653	5.23173	8.14673	5.97822	4.6301	4.58811	6.43134
ITIH3	0	0	0	0	0	0	0	0	0	0	0	0	0	0	0	0	0	0	0	0
ITIH3	0	0	0	0	0	0	0	0	0	0	0	0	0	0	0	0	0	0	0	0
GATA2	1.24569	4.75641	1.08643	3.54165	3.50781	66.8267	71.7654	58.3816	70.2491	67.7634	123.194	113.243	125.689	112.3	111.497	179.819	190.099	236.782	155.958	180.351
RPN1	236.202	246.519	242.201	269.147	254.503	190.605	184.395	179.127	186.091	183.124	148.695	153.703	143.018	156.83	158.959	176.311	215.371	167.123	170.389	186.261
PBRM1	2.46428	2.969	1.98662	2.95443	2.7469	0.701532	0.286762	0.471074	0.768142	0.399824	0.15216	0.344071	0.308538	0.398857	0.0673895	0.289633	0.0717976	0.137177	0.21094	0.0805067
GNL3	11.9814	9.42779	8.46778	9.91467	11.6005	146.541	152.544	132.382	138.733	148.956	205.895	235.907	228.788	214.711	191.335	245.889	250.641	246.889	220.768	246.73
GLT8D1	3.70454	3.92809	4.09631	3.30129	3.682	4.10761	2.75811	2.81899	2.70339	3.4842	4.71669	4.03556	4.13728	4.2343	4.51794	6.91679	9.02813	5.63174	8.12789	8.23165
SPCS1	3.48296	5.28015	2.99213	5.22287	8.46439	33.0315	33.7047	29.7023	24.1707	28.2926	64.1778	45.8872	41.9548	46.5286	61.037	92.5444	89.4369	85.515	109.416	81.7282
NEK4	42.9981	54.8205	42.3052	52.6869	51.629	8.79704	8.28609	7.40067	11.9202	11.466	11.9524	12.2971	12.0028	10.0575	10.8562	12.943	13.8294	14.683	11.3198	12.8127
CAMK1	2.77611	3.51745	3.11619	3.08968	4.04316	3.0112	2.6925	1.66121	3.29775	2.23144	3.10285	3.24965	3.84139	2.99667	4.33974	7.14974	7.32097	8.61287	4.60327	7.2583
CCDC3	0	0	0	0.179408	0	0	0.169089	0	0	0	0	0	0	0	0	0	0	0	0	0
FAM107A	0.710709	0.358115	0.900596	0	0.462907	0.818297	0.835524	0	0.453803	0	0.897686	0.81184	0.364973	1.17984	0.398386	3.84957	2.97804	3.23871	2.48584	2.85737
NAMPT	0	0	0	0	0	0	0	0	0.230942	0	0.228605	0.206761	0.185611	0.199975	0.202662	0.217687	0.216124	0	0	0
PTPRG	1.96212	1.68825	1.56273	2.58183	2.08067	3.45594	3.58615	2.19188	2.96714	3.75511	4.32203	3.9093	4.15939	4.58145	4.0321	1.31622	1.5224	1.7144	1.54461	1.34138
CSE1L	31.4823	36.9637	34.8248	37.1604	35.0937	14.6577	16.837	16.9875	18.9494	20.995	26.777	25.8077	26.7982	29.1575	27.2228	35.7245	38.8521	34.4313	33.8718	36.8212
SLC35E1	53.2101	53.719	55.7934	56.5595	55.7534	8.18012	8.52631	9.96958	10.8425	9.79461	8.3422	7.7863	9.28641	10.4694	11.7922	11.9099	14.8262	13.3616	13.1227	15.121
PEX11G	0.134401	0.540258	0.502721	0.498826	0.172158	0.613853	0.783967	0.295253	0.674258	0	0.834484	0.754764	0.541805	1.16742	1.47906	1.74781	2.68039	2.25721	2.7756	2.47412
APBA3	111.65	108.399	108.659	106.45	99.8116	11.3697	11.4752	10.7985	23.1365	11.0914	12.6602	15.5404	15.6552	17.6565	17.4958	19.2263	20.0725	16.7144	21.5851	18.0316
ABCA7	2.6201	2.95308	3.13203	2.4273	3.80182	0.209251	0.213845	0.351065	0.572411	0.297949	0.453584	0.153851	0.229905	0.198135	0.251081	0.863329	0.320967	0.562254	0.471635	0.599887
R3HDM4	45.9428	54.7898	46.3283	57.048	52.6363	11.6088	11.027	15.1112	13.2237	12.1314	6.8779	7.02338	7.92581	10.0917	9.04734	9.08443	8.17975	6.40187	6.96834	7.28569
ARID3A	2.08169	2.03487	2.51265	2.42364	2.0228	8.10745	8.28525	6.93791	8.19197	7.24882	10.2776	11.7425	11.7356	10.752	11.9779	16.2164	15.3767	14.5688	13.9359	18.745
NDUFS7	22.7778	22.3842	32.4415	20.7018	25.2696	39.5252	24.7924	33.7104	29.5755	29.7084	40.4933	43.393	37.3264	35.7496	44.6734	47.002	52.506	27.0052	48.3884	50.8673
GAMT	0.868115	0.582749	2.55434	0	0.375054	0.997042	1.01823	1.60823	0	0.382529	2.54547	1.3155	1.18207	2.86577	2.90348	22.518	29.9566	19.0212	33.2396	26.2201
DAZAP1	46.2306	42.5806	47.6668	47.101	39.6801	11.7043	14.2245	12.6386	13.3237	11.0949	3.51715	3.77754	4.99712	4.42242	4.28704	1.2559	3.94816	2.97319	2.23369	3.25992
RPS15	208.403	250.648	288.984	265.041	263.668	1011.83	952.799	918.366	849.755	985.285	1145.64	1253.3	1086.03	1205	1245.35	1815.78	1639.53	1121.48	2126.18	1715.79
ABHD8	0.466619	0	0	0.77108	0.199554	0.888707	0.181587	1.54009	0.586234	1.01704	0	0.349951	0.157037	0.338372	0.857354	0.184197	0.365642	0.348872	0.178725	0.409775
DDA1	114.08	119.163	121.776	117.445	107.132	45.4185	46.909	40.3707	54.4472	36.6504	29.828	31.6914	31.794	29.8539	29.3023	33.3597	31.0695	28.3526	36.5221	27.7813
ANO8	1.61392	0.990593	0.668582	1.87869	1.14464	0.102208	0.104439	0	0.336143	0.233281	0.110962	0.100364	0.360086	0.0969804	0.196612	0	0.104759	0.200082	0	0.117448
GTPBP3	17.1278	20.1409	20.0972	17.7436	25.2415	6.11592	6.24707	9.1012	4.21477	8.18897	2.7809	4.27571	2.71037	2.67688	7.15131	4.23764	2.63059	3.5108	3.59573	2.35757
PLVAP	0.359631	0.723232	0.449881	0.223313	0.462248	0	0.630318	0.396393	0.226356	0.706839	0.896276	0.607976	0.181922	0.588002	0.993175	0	0.635471	0.202044	0.620949	0.237358
BABAM1	28.4812	31.7597	31.7252	26.9941	27.4965	24.2776	19.7607	20.3464	19.979	18.5357	24.2923	18.4713	22.3397	24.2564	24.7734	28.6578	27.0264	23.4549	27.8025	33.9289
USHBP1	0.127807	0.385283	0.159276	0.474091	0.16363	0.583593	0	0.280627	0	0.16677	0	0	0	0	0.140573	0	0	0	0	0.167958
NR2F6	0	0.133215	0	0	0	9.53535	10.6702	7.13382	9.64165	12.1129	13.4966	19.6506	16.6973	16.6936	12.1065	17.0799	16.9483	11.2786	18.0965	18.8222
TAX1BP3	32.0802	32.0684	30.2486	28.5927	34.5624	29.1922	28.6911	28.7858	27.0328	28.138	26.9991	34.8844	24.6635	30.5794	26.715	19.7421	21.1979	28.6931	21.3762	28.6038
SLC1A6	0	0	0.451058	0.223898	0.231729	0	0	0	0	0	0	0	0	0	0	0	0.21238	0	0	0.23798
POLE4	25.1043	26.8079	29.006	28.6074	27.4235	17.5953	16.6451	17.5586	17.7225	16.3982	10.9887	11.061	11.2206	9.9188	11.4668	14.8493	13.7317	10.707	15.0648	17.0794
CTNS	2.26131	3.03448	1.57979	2.82535	3.24708	9.5092	7.65212	6.68309	6.99898	8.60918	17.3148	12.2431	16.3684	15.1561	16.1947	17.6922	19.3653	20.1571	18.6062	19.3547
NRTN	0	0.320571	0.199165	0.197678	0.409255	0	0.186174	0	0.200384	0	0	0	0	0	0	0	0	0	0	0
NDUFA11	138.287	106.916	144.022	102.964	90.6565	73.3287	69.9077	75.4309	95.9762	81.5387	54.637	107.224	57.778	79.9288	86.7653	103.178	111.044	67.3855	111.607	81.1073
GADD45B	1.69183	3.40501	1.21485	4.52593	1.87269	130.507	118.865	125.266	114.057	122.215	98.3463	94.1464	106.193	94.023	97.4188	56.7802	61.8474	46.3907	61.2009	62.5425
RAB3A	0.532663	1.07603	2.05182	2.0454	1.40691	0	1.26023	0.603389	0	0	0	0.616893	0	0.598783	0	0	0	0.615488	0.629205	0
LSM4	358.831	315.934	309.596	321.029	309.065	54.6033	57.9633	53.2306	95.5836	54.4831	51.7562	59.3213	50.4568	54.9037	55.0649	70.5786	74.861	67.865	55.5225	76.7084
DDX49	31.66	31.0761	29.903	23.5635	27.3119	33.4055	30.5796	28.4398	33.1985	34.5559	39.0084	38.4882	40.3119	34.1251	31.2294	45.0258	35.3172	39.8645	36.2508	37.3182
KLHL26	7.56894	6.74317	8.43996	7.0882	6.14036	0.376876	0.110043	0.567805	0.648067	0.306663	0.233423	0.316699	0.141978	0.0509827	0.155055	0.333217	0.220239	0.473478	0.107872	0.370461
CRTC1	9.3789	10.2358	6.24972	9.92943	9.24749	0.685238	0.699978	1.10141	0.754809	0.523775	0	0	0.404457	0.435765	0	0	0.235497	0.224565	0	0.527709
COMP	0.445639	0.223855	0.416029	0.550265	0.142461	0.762611	0.389605	0.488637	0.13947	0.43555	0.138105	0.624563	0.336186	0.241454	0.367113	0	0.260852	0.498064	0.12761	0.292411
DBNDD2	3.56177	3.8526	4.31352	4.61577	3.96457	1.45758	2.02131	1.99974	0.799011	2.25763	1.8086	3.16947	1.19218	1.77833	1.80263	1.93673	2.24115	1.63059	1.35794	2.15364
BMP7	0.210651	0.529034	0	0.389962	0.673096	135.15	130.852	164.61	126.912	135.679	157.647	140.936	139.56	141.225	163.732	81.8657	90.8243	78.9501	73.3179	81.2318
SMIM7	13.368	7.20636	9.897	6.55467	8.32151	16.6923	13.9749	14.8012	16.9089	16.6566	17.0322	17.5663	16.5055	13.0763	15.1051	20.7764	20.9219	21.5572	17.6612	16.7852
TMEM38A	1.1294	0.568558	0.355868	0.353709	0	3.56617	2.31764	5.01874	2.15049	1.49214	3.54622	1.60361	5.18713	2.79453	2.51676	4.39181	3.02181	2.87836	3.27438	1.12802
THOP1	207.461	229.873	226.179	212.984	229.007	90.3826	102.496	123.683	115.061	103.177	88.8722	82.2441	95.3841	97.3613	92.1422	86.8977	85.2604	60.6397	82.5854	82.117
NWD1	0.195298	0.326818	0.403803	0.480435	0.414769	0	0	0	0.0811918	0.0845216	0	0.0727346	0.065225	0	0	0	0.0758919	0	0	0
REEP6	0.22103	0.222367	0	0	0	0	0	0	0	0	0	0	0.224407	0	0.245007	0	0	0.249156	0	0
C19orf25	11.6647	19.5844	17.205	16.2942	20.2116	17.5136	17.1229	10.8337	18.5724	13.7452	15.106	15.1386	17.2584	20.0268	14.8541	20.2286	18.5662	22.83	24.499	27.2825
APC2	1.26915	1.38027	1.04872	1.10462	1.34645	0.0601973	0	0	0.0658882	0	0	0	0	0	0	0	0	0.0588342	0	0
DIRAS1	0	0	0	0	0	0	0	0.331483	0	0	0	0	0	0	0.166074	0	0	0	0.17311	0
ADGRL4	4.84414	2.63127	5.38547	3.40043	3.68849	0.298945	0.152718	0.143768	0.492468	0.512633	0.487604	0.147008	0.131907	0	0	0	0.153541	0	0.150172	0
ADGRL2	3.38093	3.91625	2.38526	3.89838	4.50261	11.9602	12.4646	7.77839	12.5071	10.5241	27.4721	27.4612	27.7465	26.9182	27.2887	59.5596	55.5994	73.7213	47.8154	60.7849
TTLL7	12.9519	13.735	13.2131	15.2512	13.7572	2.77097	2.77515	3.34758	3.15368	2.96739	1.32157	0.76069	1.51026	1.52198	1.11731	0.343015	0.340078	0.379088	0.499692	0.254238
PRKACG	0	0.300363	0	0	0	0.170703	0	0	0	0.195302	1.30028	1.68007	1.2062	1.78683	0.987808	8.84279	9.6538	12.2265	9.26703	9.44239
SAMD13	60.5926	57.5864	57.9199	61.4555	57.5077	12.2322	9.75073	14.9971	14.4985	8.57399	7.17328	6.19272	6.88768	5.13777	5.78419	6.21179	7.09799	7.6452	7.52732	8.29556
DNASE2B	0	0	0	0	0	0.998716	1.69989	1.28877	1.47266	0	1.09277	1.64716	1.18409	0.318961	1.61579	0.69404	1.72458	0.328509	1.68161	0.772492
KCNMB2	0	0	0	0	0.131617	0	0	0	0	0	0	0	0	0	0	0	0.120483	0	0	0.135066
TBL1XR1	2.8788	3.7046	2.45973	2.21769	4.24946	25.3302	21.4819	23.7342	20.0118	25.5134	44.0893	42.6979	43.5368	44.3724	45.3735	53.2	51.4003	52.4978	46.0927	57.1546
NLGN1	8.41242	9.90624	7.45727	8.4269	7.66281	0.469813	0	0.906377	1.2941	0	0.256174	0.231694	0.416068	0	0.227136	0	0.242266	0	0	0
ECT2	38.9154	37.8112	33.1388	33.6955	39.7499	13.6615	13.665	14.3174	15.7115	12.5136	17.2305	15.3014	18.8916	18.4354	18.1326	17.3945	18.4348	14.6871	14.4754	16.3578
MCF2L2	1.2488	1.63526	0.471136	0.800685	1.03696	0.988975	1.01067	1.00771	1.21785	1.05651	0.469098	0.181843	0.434807	0.175652	0.0593563	0.510222	0.126471	0.241659	0.309683	0.283635
B3GNT5	0	0	0	0	0	138.602	137.227	119.36	118.064	131.877	126.98	134.341	124.824	128.538	123.734	87.0708	86.788	60.9235	77.8474	88.0097
SLC4A10	0.25599	0.15419	0.126902	0	0.391031	18.2992	18.7603	10.5058	16.137	15.1391	13.3933	14.7429	16.3958	16.5035	15.9473	13.8887	10.4319	15.8333	10.9189	13.9039
TBR1	0	0	0	0	0	0.72845	1.48819	0.702861	0.267616	0.557103	0	0	0.430219	0	0.234859	0.252252	0.501033	0.238848	0.733924	0
PSMD14	190.502	171.747	182.01	175.728	144.915	135.399	148.598	150.636	153.751	133.81	147.181	119.032	160.894	136.749	153.918	132.629	146.663	107.083	140.784	111.81
RBMS1	0.406227	0.918143	0.88425	0.877075	1.16789	23.1636	24.1419	17.3585	22.2309	26.5801	42.3934	38.7992	41.1327	38.1552	48.3725	71.3684	73.409	86.1968	65.793	82.8275
ITGB6	15.6444	17.2316	17.4595	17.4638	16.8986	0.264459	0.405318	0.635547	0.435373	0.755345	0	0.129974	0.116608	0.376874	0	0	0.13572	0.259125	0	0.152136
PLA2R1	3.52965	4.22314	3.26316	2.68102	3.92648	0.342241	0.174863	0.246355	0.374954	0.097582	0.0928367	0.335881	0.451843	0.486766	0.328959	0.353445	0.350513	0.418486	0.17159	0.0982502
LY75	64.6441	71.9602	59.5873	65.9346	66.6776	2.66928	2.72781	4.32763	7.44413	1.73821	1.24035	0.747931	1.00598	1.32454	0.854484	0.590228	0.845312	0.74547	0.509493	0.510397
MYOM2	0.261814	0.131439	0	0.483062	0.417036	0.298177	0.380884	0.286076	0.408178	0.169967	0.161708	0.219396	0.131163	0.353249	0.21486	0	0.228921	0.145786	0.224173	0.0855612
LGSN	1.78905	0.817517	0.609606	1.21015	2.08777	1.30134	0.379851	2.14838	0.613354	0.638448	2.02402	1.64757	1.31445	1.77019	1.97347	0.385435	0	0.182501	0	0.857489
PTP4A1	111.172	96.5353	85.4132	87.3854	109.476	347.914	336.288	273.957	328	298.967	313.192	336.465	303.255	318.748	320.536	351.748	341.803	344.638	327.812	368.534
COL9A1	0	0.545943	0.169351	0.504126	0.521954	0.155083	0.633793	0.44758	0.170355	0.709316	0.337336	0.457664	0.136891	0.884871	0	0.321158	0	0.152078	0.155835	0
HYLS1	101.436	101.63	113.295	108.35	96.455	29.169	32.6048	28.1145	32.8078	33.9071	38.6943	32.0805	37.2146	38.2814	32.6698	28.0734	22.2107	27.4144	21.7011	29.2793
MRPL4	6.31463	4.68765	4.62474	4.18123	4.75393	40.5267	32.013	32.6167	40.2439	41.8834	46.5131	53.0556	45.9901	41.4801	42.765	43.1227	38.1162	41.9514	52.2223	40.8948
C6orf120	98.061	99.525	101.82	104.884	100.821	13.2577	11.0211	15.2056	19.758	15.955	8.76388	8.23098	9.31191	9.73823	8.9699	13.807	8.93407	10.3354	11.8276	12.8647
KRT15	0	0.240047	0	0	0	0	0	0.264123	0	0.314056	0.298603	0.540126	0	0.261344	0	0	1.13013	0	0	0
KRT15	0	0.202677	0	0.250713	0	0.692013	0.235632	0.667431	0.508225	1.3225	0.251519	0.227484	0.408495	1.5404	1.11502	0.958101	1.18925	0.680412	0.929276	0
KRT17	0.251801	0	0	0	0	0	0	0	0	0.331853	0.946528	0.570703	0.768966	0.552351	0.279836	0	0.298587	0	0.291362	0.33444
HAP1	5.37145	5.66466	5.22911	5.517	6.28578	7.75579	5.31816	4.31195	4.47496	6.17236	4.54241	7.11481	6.9209	7.84323	5.20215	6.74918	7.11258	6.79223	5.32381	5.98056
JUP	67.755	66.3114	55.7629	71.2353	68.881	226.017	244.568	215.294	228.017	242.057	240.28	264.861	264.315	276.938	272.909	248.844	232.541	225.552	190.485	253.939
CDC6	516.578	534.041	513.962	528.932	531.345	396.73	412.833	462.561	438.576	400.285	364.834	345.46	375.979	377.894	322.088	182.952	187.607	161.053	161.68	191.651
WIPF2	81.5213	81.7882	73.4297	86.1338	79.507	20.8055	21.3866	21.3203	25.854	19.4691	20.4264	20.3228	23.4251	21.07	25.4595	36.8152	37.0373	42.6036	30.8282	38.2029
ABCC10	68.5955	73.2229	59.4945	67.9232	72.6986	7.76446	7.25181	10.256	13.262	7.90263	2.89865	2.62181	3.67389	3.56206	3.37017	3.27619	4.01844	2.69495	3.43223	5.27249
INMT	0.143577	0	0	0	0.184039	0.163997	0.335103	0.631265	1.08124	0.750333	0.535249	1.1296	1.59293	1.0921	2.84625	1.18906	2.69721	0.965217	2.30772	3.02298
SP2	67.6765	65.76	63.7779	80.5892	69.6455	11.4594	11.7085	12.2435	16.6198	12.1265	14.6106	12.7976	13.3545	16.1352	16.0818	16.3982	19.0306	18.7199	14.4944	17.4234
SOCS7	0.1073	0.32338	0.133521	0.264893	0.137164	1.83592	1.75085	2.23472	1.20853	1.67739	3.72313	2.64589	3.45252	2.4409	5.06614	1.39234	2.26023	2.75735	2.58021	2.53374
GPR179	1.12275	0.805098	0.927785	1.31395	1.63363	0.24345	0.684172	0.583656	0.599561	0.277403	0.0659835	0.238729	0.267574	0.17295	0.17533	0	0	0	0	0
MRPL45	4.28393	3.92644	6.92646	4.43124	9.66439	11.6736	13.2933	17.8863	18.4535	21.7993	32.0587	28.9925	25.2739	28.964	36.7814	31.0255	40.6928	24.4685	37.3259	40.8307
NPEPPS	82.213	87.7397	75.2904	87.2578	86.2102	43.6281	43.629	48.0591	51.4901	52.6438	31.9719	30.9316	30.2044	34.396	30.1164	21.1865	22.8269	22.5307	24.5906	23.0229
KRT15	0	0	0	0	0	2.9515	7.4498	6.85224	3.24441	1.98658	2.07838	3.07606	1.53367	2.14802	1.67465	0.179895	0.357089	0.170364	0.349114	0
KRT15	0	0	0	0	0	0	0	0	0	0	0.297568	0	0.241716	0	0	0	0	0	0	0
AP1S2	112.293	99.0896	108.26	101.621	109.125	52.744	53.3966	47.6987	53.7041	51.5783	34.6663	30.4245	41.9151	42.2391	34.3798	45.2411	42.4983	53.9526	32.731	51.1512
ZRSR2	13.4249	18.2339	9.0879	18.9575	16.475	17.2737	13.3939	16.2462	15.8599	15.8101	14.2409	18.8996	17.3867	18.382	14.0333	19.891	15.0822	19.7994	12.6671	20.007
RBBP7	112.634	99.5146	103.756	109.12	107.546	149.898	155.685	147.278	167.516	159.079	170.592	195.381	197.34	188.966	180.027	224.522	218.183	177.993	199.128	208.145
TXLNG	76.6398	70.9225	61.2133	74.0721	69.9531	20.4739	17.283	17.3455	27.5058	17.9721	14.3932	18.0862	16.5341	18.8251	17.286	21.9744	19.3308	19.8563	16.3365	23.8206
RTEL1	54.1572	62.3755	52.7839	52.6873	58.8856	9.78659	11.1704	13.6982	11.6427	11.7634	8.7039	7.56584	9.99601	8.79283	6.91007	3.12028	5.12262	4.9937	3.65599	2.99116
ZGPAT	23.8927	26.0389	23.7048	20.3159	25.8299	28.7709	35.1054	35.5974	42.4546	31.969	32.1953	25.3987	30.777	33.0013	22.3515	37.4639	31.6027	27.255	26.9356	34.4725
DNHD1	0.0315363	0	0	0.0386813	0	0	0.0366599	0.0343704	0	0	0.0388563	0	0.0315079	0	0	0	0	0	0	0
CHRNA4	0	0	0	0	0	0.378917	0.193553	0.182475	0.208386	0	0	0.186584	0.334941	0	0.18286	0.589278	0.389959	0.372024	0	0.218501
BTF3L4	397.605	396.604	451.195	395.669	360.176	404.779	418.638	424.215	378.922	404.97	369.444	376.309	382.638	349.927	334.803	300.298	267.293	299.827	290.81	270.573
ZFYVE9	3.10556	1.62831	2.69375	2.50584	1.55669	0.308358	0.630098	0.148319	0.338711	0.705156	0	0.151661	0	0.293226	0.1486	0.159637	0.950466	0.151186	0	0.177552
ELOVL1	70.2083	67.0391	69.6973	66.4747	64.0614	17.4745	16.2826	21.4559	24.5029	14.5116	4.6004	5.67388	5.43229	4.20657	6.67289	3.58395	2.9647	3.58247	3.86347	2.21487
MOB3C	0.727082	0	0.913714	1.21033	1.25199	1.11145	0.283803	2.14735	0.306648	0	0	0.274456	0.246513	0	1.07653	0	0.287143	1.09463	0.560492	0.32164
MKNK1	145.988	163.187	127.322	146.95	160.005	4.56679	5.91014	6.44295	23.2405	7.13578	4.63525	5.09082	6.44893	5.93451	4.54791	4.88571	5.63005	5.07488	5.65919	4.20694
ATP5F1B	277.656	329.456	284.159	305.337	290.674	183.749	195.35	224.431	247.064	211.259	217.482	197.16	233.201	230.037	240.13	307.267	318.163	198.874	368.039	295.612
ABCB11	0	0	0	0	0	0	0	0.0863203	0	0.102577	0	0	0.0791633	0	0.0864503	0.0928843	0.0921175	0.175961	0.090184	0
MAST3	29.3427	30.7233	22.3803	27.013	30.1332	3.94132	3.86456	2.96166	4.95388	3.21563	2.13593	2.50633	2.48127	3.22776	3.32336	3.62592	3.92161	4.00726	3.94831	4.15335
HOMER3	37.1254	30.7309	30.1488	36.3416	34.7816	3.72211	4.45533	5.20911	5.94674	6.06908	2.30943	1.56663	0.936823	1.61479	1.73916	0.769393	0.981198	1.76981	0.64023	2.07782
ARRDC2	2.60482	1.13782	2.11485	2.23783	2.46225	14.9888	14.1267	9.19065	12.6201	12.8418	9.96907	9.27079	16.1786	12.6426	13.81	13.9009	14.7193	11.1403	15.3092	15.9053
WDR18	107.889	109.027	107.972	118.579	98.921	85.9701	82.3615	94.738	91.9005	94.2452	74.3909	83.9007	68.2208	68.0122	65.5496	43.9529	39.611	38.9945	46.1572	38.2146
GRIN3B	0.0647974	0	0	0	0.0825671	0	0	0	0	0	0	0	0	0	0	0.0761775	0	0	0.0739717	0
TMEM259	99.6731	106.294	93.3176	100.477	97.3424	15.1896	15.5221	17.6553	25.8987	16.5157	10.3621	12.3686	10.5407	12.914	13.3921	16.2485	16.1126	13.5533	12.8731	17.8866
MED16	48.128	48.0029	48.7298	49.2086	55.4401	11.4635	14.4367	13.8391	12.143	11.1174	23.3233	21.3574	22.2176	26.8485	23.8761	32.6839	31.8794	31.4776	33.7313	35.2751
PLPPR3	0	0.0847989	0	0	0	0	0.0983332	0.0923929	0.210944	0	0	0.377905	0.0847365	0.182573	0.185071	0	0	0	0.0965263	0
PALM	0	0.187889	0	0	0	0.213762	0.218368	0	0.235334	0	0	0	0	0.407564	0	0.221826	0	0	0	0.24678
THAP6	28.0094	27.732	23.7105	30.477	28.3783	5.09333	5.7228	7.12875	4.21203	5.26093	5.00237	4.02159	4.74008	6.80945	6.16093	14.0281	16.0362	11.0268	11.2936	14.7253
PTBP1	123.154	120.839	123.383	132.643	124.137	436.01	409.462	402.276	430.626	410.766	391.101	429.322	461.95	452.557	439.387	314.056	295.531	321.127	257.314	304.134
FAM174C	129.351	105.332	115.2	111.427	108.257	24.2358	36.7508	40.0282	39.1132	37.2708	14.4485	18.492	13.2845	14.5516	13.7788	18.4338	14.4402	15.979	16.8695	21.0883
EFNA2	0	0	0	0	0	0	0	0	0	0	0	0	0	0	0	0	0	0	0	0
SGTA	131.408	135.803	129.38	129.709	125.317	150.082	149.968	150.717	164.991	146.796	130.387	140.706	145.15	142.904	142.702	93.706	95.3284	71.885	96.0589	103.644
ELAVL1	23.2355	27.9981	24.5045	23.301	25.3886	61.2231	68.5122	58.6012	64.8504	69.8758	77.5319	87.0058	100.904	99.9213	107.995	114.836	138.221	117.995	123.922	133.606
RPN2	54.1184	54.8263	54.0542	52.9283	59.0399	30.5794	30.0663	25.6302	30.1699	32.157	41.8539	46.1058	49.5045	41.2907	42.008	73.9061	77.7392	58.8643	74.6925	79.9307
GHRH	0	0	0	0	0	0	0	0	0	0	0	0	0	0	0	0	0	0.476682	0	0
CDK5RAP1	4.90359	4.36657	2.91314	3.16505	4.84523	2.54285	2.46829	1.83298	3.06932	1.88799	2.90113	2.49906	2.35406	3.26069	2.69303	5.78644	4.82731	3.1139	4.72311	4.53382
GDF11	0	0.167251	0	0	0	1.3313	0.582885	3.29722	0.627574	0.653247	0	1.12382	2.18553	0	0.367134	0.39437	0.391468	0.560191	0.19131	0.219346
RAP1A	45.5695	48.2181	56.754	57.1846	54.3666	24.3932	23.9231	23.6864	18.2484	22.5703	8.07602	6.72772	10.3523	9.48031	11.3035	6.07095	7.63364	8.04861	7.85315	10.3552
PANK4	85.2918	81.1027	78.0415	84.7522	82.6545	37.1283	39.2673	39.8207	45.75	39.141	16.9881	16.9019	22.9749	24.504	17.311	11.9941	9.76022	6.76485	7.71771	8.54287
DRAXIN	0	0	0	0	0.0524965	0	0	0	0	0	0	0	0.0412679	0	0	0.242141	0.336069	0.275257	0.282211	0.215359
AGTRAP	0.0697705	0.0700577	0.173169	0.171703	0.266812	0.0794736	0.0812131	0	0	0	0	0	0	0	0	0.984681	0.813716	1.32135	0.956128	1.45981
SPATA1	0	0	0	0	0	0	0.30471	0	0	0	0.326058	0	0	0.285432	0	0.621179	0.617217	0.882138	0.602186	0
RPF1	159.292	161.213	166.207	148.303	159.414	103.253	102.202	115.379	104.505	116.106	78.1489	75.9348	71.5011	79.8347	82.9581	77.4759	86.0292	98.7671	83.7108	84.0546
ARPC4	42.0601	48.8055	35.3995	42.4621	37.5719	33.6241	36.4831	37.9881	36.8224	39.5338	31.8273	41.2691	30.5437	34.926	37.0853	51.8785	54.1144	57.4092	45.6702	43.9201
TADA3	22.8422	23.1045	24.6906	26.6644	24.6208	22.1041	18.8475	18.7135	24.4736	19.2015	28.9316	32.5459	28.1793	30.201	38.1418	30.4719	40.1507	36.5208	38.7575	33.8932
HMCES	12.0599	13.2479	13.9934	12.1502	16.1735	0.800781	1.30903	0.924599	2.28749	1.09898	2.09058	1.57571	1.55538	2.13269	2.31597	3.48312	2.46897	2.98453	3.38011	3.13618
RAB7A	70.8651	67.9142	64.9693	62.8457	66.7524	63.5974	62.8446	54.6898	59.9575	63.9273	62.0349	65.0551	70.7719	66.6943	66.3144	57.3013	60.3855	59.6525	63.2101	55.6642
SLC25A26	20.2319	26.4187	23.6064	25.5566	19.2832	17.1195	19.7418	21.8711	20.4153	16.1746	10.8555	11.1815	7.83842	8.97331	7.75538	2.87211	2.56789	3.53505	2.50628	0.958804
LRIG1	35.1367	39.5484	30.3087	38.3937	38.4408	5.1214	6.069	4.75354	8.10843	5.71017	4.66531	5.44835	6.03451	6.29439	4.81198	9.66661	8.97084	10.0089	8.56931	10.3097
KBTBD8	40.2325	38.5684	39.4501	41.347	35.7356	35.6008	44.8417	32.6937	47.5156	37.0394	27.5336	24.3628	30.2817	28.6339	25.1174	28.3409	28.6665	25.3621	22.75	30.5605
SUCLG2	36.6083	34.5978	35.9487	35.873	29.3066	40.2262	41.6445	33.3933	41.0819	34.1695	24.1303	28.1611	21.0092	20.7626	16.5583	13.711	15.0799	20.7048	12.4047	14.2207
TAFA4	0	0.536341	0	0	0.689363	0	0	0	0	0	0.334184	0	0.271528	0	0	0	0	0	0	0
EOGT	3.61578	4.21037	2.62068	5.44061	4.4064	1.52427	2.66931	2.51911	2.87717	1.4974	1.66131	3.43442	3.46871	3.11431	0	1.58201	2.46834	2.35405	2.41145	2.51429
TMF1	59.7245	64.4482	49.6822	63.8581	62.8764	16.1725	17.8448	20.4761	25.1643	15.5018	11.8544	11.0599	8.10172	11.8275	9.75709	13.3263	14.3612	12.9595	10.6102	12.6445
UBA3	161.004	168.412	157.255	144.04	146.531	22.247	19.5703	25.0119	30.606	20.7665	11.6699	10.5548	11.8435	10.797	9.74841	13.0356	15.2753	7.89208	11.4019	10.4602
CISH	0.588996	2.96556	1.48604	2.95447	0.763695	2.7064	1.03645	0.982421	2.24525	1.55787	3.70227	2.00899	2.40709	3.89045	1.31386	2.82173	4.20714	4.67456	2.05097	4.31854
RPUSD4	25.239	26.5928	28.747	22.7435	23.5404	17.593	16.9631	17.33	16.3117	13.8095	22.3911	24.1463	18.3531	20.3383	17.1767	15.9905	19.9442	20.7724	22.6732	18.0163
TWF2	0	0	0	0	0	0.255322	0.260797	0.739373	1.12613	0.8791	0	0	0.905221	0	0.494156	0.265369	0.527146	0.502521	0.257338	0
QRICH1	100.915	122.337	101.133	118.763	110.922	133.45	130.913	148.475	150.414	119.393	127.724	122.853	132.123	129.072	119.435	127.459	125.467	112.952	113.387	130.713
PRRT3	0	0	0	0	0	0	0	0.149018	0	0	0	0	0.136729	0.147305	0	0.16039	0	0.151899	0	0
MUSTN1	0	0	0	0	0	0	0	0	0	0	0	0	0	0.516995	0	0	0	0	0.543807	0
TMCC1	82.3821	81.8551	81.3698	89.6893	83.736	2.07147	2.11655	1.86663	10.6558	1.47898	2.9544	2.79943	2.62564	2.45972	2.11921	10.3123	10.3637	8.37166	8.9696	10.4258
STIMATE-MUSTN1	162.511	170.887	164.113	168.456	161.834	27.5518	33.3328	39.9317	46.7958	36.965	13.5581	13.6105	16.4429	14.0674	13.7305	20.5661	13.6502	11.8212	16.9326	17.1938
SFMBT1	25.4863	31.3256	26.3569	34.3765	27.302	0.914215	1.03797	0.877911	2.67255	1.62289	0.441111	0.99745	1.16305	1.63849	1.66089	2.20433	3.22748	1.49135	2.34387	2.68463
PRKCD	11.3687	12.0498	11.7574	11.7443	12.7926	20.5441	19.9318	21.5549	24.1667	21.5117	17.2573	17.9623	19.2035	21.2939	22.5079	16.1774	20.053	15.7928	14.0252	18.3546
FGD5	0.429151	0.60308	0.372078	0.579569	0.163783	0.244171	0.349349	0.374496	0.534281	0.444964	0.317531	0.335078	0.17167	0.231167	0.281225	0.0503637	0.0998591	0.0477095	0.0978288	0
ZMYND8	0.349124	0.934693	0.144299	2.00282	0.518753	0.662508	1.01555	0.889623	0.362653	0.604046	1.50861	0.909691	1.16531	1.50643	0.699941	1.57252	1.35583	1.74864	1.26149	2.3565
NCOA3	37.2127	35.6581	29.5341	39.4193	35.5536	24.4479	26.9549	24.4602	31.2555	23.9602	18.1429	20.7417	22.9199	21.2141	21.2073	22.4019	21.5114	20.4302	16.2696	23.4794
ID1	16.4788	14.5414	12.5816	17.2207	16.17	1050.05	1031.22	1021.19	1011.68	1063.81	1099.65	1018.1	1061.3	1031.87	1006.13	1348.1	1404.17	1006.08	1547.26	1335.48
PFKFB2	7.9146	8.06696	6.99776	9.20879	9.9763	0.523507	0.93607	0.37741	1.43632	0.448548	0.142225	0.385916	0	0.49733	0.126024	0	0.268646	0.512924	0.262831	0.301142
PHTF1	79.2162	70.4286	76.0598	71.8392	73.2433	13.608	11.0184	9.0075	9.29782	12.465	16.0421	9.33669	10.6401	10.9751	10.012	14.2089	11.4616	8.55243	12.5029	13.1435
MAGI1	23.9363	27.6395	19.7654	25.5551	25.4865	58.4734	62.7331	56.3841	66.2967	58.7882	72.4064	74.1986	74.1142	82.2696	75.5418	70.9422	66.0424	74.4829	58.076	70.836
RHO	0	0	0	0	0	0	0	0	0	0	0	0	0	0	0	0	0	0	0	0
ADAMTS9	0.100637	0.168341	0.0415209	0.0411527	0.127934	0.152636	0.194991	0.0365657	0.0417318	0.0434447	0	0.149564	0	0.0361106	0.0366093	0.0786769	0.0779911	0.0372662	0.191047	0.174931
PRICKLE2	33.2116	35.1646	32.2317	39.9013	29.2429	7.55154	9.59024	7.2532	12.3022	10.0974	11.3628	11.0191	11.6898	11.3649	10.8974	16.2796	16.8114	14.5746	14.1805	17.1112
PSMD6	216.641	213.677	218.592	196.965	217.552	190.999	211.482	223.762	203.074	209.909	285.028	274.925	273.332	248.643	243.67	279.731	254.498	207.319	257.459	261.633
ATXN7	3.55413	4.09444	2.70079	4.16429	3.13354	1.37862	1.1741	1.4095	1.96059	1.67471	1.1951	1.17106	1.93832	2.17507	2.07277	1.70598	2.20799	1.70586	1.61089	1.8966
THOC7	429.046	393.602	468.655	414.473	423.778	461.247	408.493	421.202	411.542	393.857	323.996	322.476	337.172	330.297	307.34	214.33	206.778	283.833	234.621	221.925
SYNPR	0	0	0	0	0	0.0972456	0.198739	0	0.319764	0.110957	0	0.0954756	0	0	0	0.100473	0	0.0951673	0.097547	0
C3orf14	3.88586	1.46642	3.05218	1.81937	3.13664	0	0.284401	0.806968	0.307301	0	0.608211	0.550078	0.741114	0	1.07882	1.44828	1.43878	0.822722	2.24673	2.25628
FEZF2	0	0.209091	0	1.03506	0.267751	0	0.243122	0	0	0.818958	0.778752	0.939108	0.421615	0.681381	1.38098	44.4982	40.9985	44.709	49.6306	43.1827
OGFR	13.2549	9.22865	10.1345	12.3519	11.601	1.99008	2.44004	2.93334	2.03857	1.9705	1.44184	2.86904	2.223	2.01676	1.6609	1.37257	1.36177	1.42998	1.33225	0.610591
OGFR	2.09335	0.765521	1.90595	0.473097	1.4688	0.217753	0.222443	0.209926	0.239764	0	0	0	0.192706	0	0	0	0.224395	0	0	0
OGFR	2.04479	0.948688	0.785766	1.55976	0.403657	0	0	0	0	0	0	0	0	0	0	0	0	0	0	0
CDH4	0.20318	0.136007	0	0.249966	0.172637	0.0771395	0.0788284	0.148031	0.253458	0.175902	0	0	0.0678721	0.0731175	0.0741211	0	0	0	0	0
TAF4	46.2343	56.307	45.3263	54.924	46.9812	5.72199	7.37177	6.21624	9.14424	6.96156	3.78411	1.83356	2.7415	3.07161	2.15547	6.56118	5.48801	6.70168	4.87027	5.00748
FMOD	0	0.199787	0.497669	0	0.255688	0	0.232256	0	0	0	0.247887	0	0.201292	0.433747	0	0	0	0	0	0
PRELP	0	0	0	0	0	0	0	0	0	0	0	0	0.180412	0	0	0	0	0	0	0
MAPKAPK2	229.633	226.47	213.711	234.019	222.234	124.098	121.635	136.03	146.57	129.046	93.0957	101.714	106.848	107.068	105.119	100.385	111	112.657	87.2905	113.673
DYRK3	146.084	145.726	135.365	134.225	147.83	45.8264	46.2252	44.1432	53.3482	40.0395	42.4879	47.7891	44.8639	45.1307	46.8039	54.1227	51.9446	39.1306	49.1664	46.3218
RASSF5	8.16268	9.77209	9.42471	10.3395	9.09946	0.692515	0.766687	0.940717	2.14742	0.591756	0.187676	0.282924	0	0.43725	0.44327	0.476294	0.472226	0.394786	0.289098	0.330962
IKBKE	14.8552	13.9129	13.5708	14.4046	14.5288	0.87698	0.985773	1.34682	1.53742	0.900254	0.0951632	0.0860745	0.385979	0.166325	0.337207	0.905764	1.07792	0.428975	0.615612	1.10786
SRGAP2	2.99069	3.00213	1.96841	3.21381	2.55694	1.32956	0.706551	0.968764	1.1057	1.09049	1.4987	1.92911	1.86989	2.61868	3.21634	5.26628	7.07021	5.66424	6.55303	6.22082
FAM72A	6.59336	5.65594	6.03491	4.01519	6.03566	5.83199	7.82216	7.34344	6.78555	6.64832	3.7161	3.71878	5.6435	5.7342	5.18264	3.01003	3.50705	3.77789	2.70368	2.59372
FOXP4	4.33251	4.16201	4.04013	5.26356	3.43828	0.477171	0.433464	0.406644	1.56642	0.60396	0.689579	0.935593	0.559239	0.953875	0.967018	1.58595	1.84343	1.96861	1.38093	2.06722
MDFI	29.4893	28.7293	30.9606	27.7289	29.6756	0.518356	0.706106	1.16426	0.949635	1.1862	0.5641	0.340137	0.457882	0.164435	0.333314	0.537082	0.355364	0.67817	0.347432	0.199133
TFEB	0.626895	0.858237	0.353296	0.77056	0.943496	2.20609	1.52508	2.98712	2.41508	1.47891	2.4624	2.73633	2.68188	2.58176	3.24043	2.14264	2.52281	3.23474	1.56055	2.8289
TMEM183A	8.45388	7.28551	9.70695	10.9207	8.86539	5.72115	5.44158	4.5614	5.42635	3.84085	4.51223	7.1905	6.80321	8.0814	9.52346	11.662	11.3738	11.8185	12.5049	11.1522
PPFIA4	0.165626	0.166336	0.411469	0.306034	0.105666	0.0943761	0.0964382	0	1.24118	0.107672	0	0	0	0	0	0	0	0	0	0
MYOG	0.277855	0	0	0	0	0	0	0	0	0	0	0	0	0	0	0	0	0	0	0
MDM4	90.0843	97.6083	86.7452	95.6774	98.8663	8.71344	10.5996	9.86232	19.1058	9.35249	10.5865	11.4089	8.49734	8.76049	11.5742	16.5089	14.0354	13.606	13.0092	14.6624
ATP2B4	53.5019	55.7065	44.8903	55.0411	55.4933	35.0215	40.4089	36.492	44.5873	36.7684	26.8156	25.8648	28.632	27.9114	27.1507	17.782	18.4281	20.6009	15.6642	18.3562
OPTC	0	0	0.346708	0	0	0	0.322658	0	0	0	0	0.312459	0	0.302482	0.306474	2.63293	1.30828	2.80416	0.319012	0
CSF1	0	0	0	0	0	3.14577	2.32113	4.54246	1.34482	1.99979	0.3804	0.344057	0.308777	0.997994	1.85437	1.08655	0.359469	0.685988	0.702867	0.604295
KISS1	0	0	0	0	0	0	0	0	0.916828	0	0	0	0.738403	0	0	0.864044	2.58806	2.45097	0.83434	2.89097
GOLT1A	0	0	0	0	0	3.19416	1.62591	1.61488	5.56696	3.85824	9.12988	8.2524	2.99762	3.23322	3.26609	24.4773	19.3515	8.24921	25.1664	15.6537
PLEKHA6	2.98447	2.99633	1.66894	2.73368	3.42846	0.333146	0.340449	0.319541	0.510622	0	0.216749	0.0653499	0.117199	0.126255	0.127991	1.03143	0.13636	0.390812	0.400646	0.688063
PIK3C2B	50.6398	61.1795	41.6654	53.3053	54.9634	4.16391	5.20065	6.43683	9.28984	3.25291	2.67659	3.5558	3.66367	2.55811	1.8523	9.63265	7.73635	5.05235	8.34858	9.11706
NFASC	1.20311	1.13852	0.638245	0.969972	0.830329	0.11731	0.23978	0.0749437	0.128298	0.133564	0	0	0	0.0740114	0.0750334	0.362821	0.319699	0.420087	0.469873	0.2689
CNTN2	6.52285	6.55497	4.6469	5.43419	4.774	2.43189	3.57171	2.7779	2.83798	2.25908	2.31405	3.13948	3.89022	3.90206	2.49017	1.41625	2.18608	2.3845	0.763578	2.97532
CHIT1	0	0	0	0	0	0	0	0	0	0	0	0.256499	0	0	0	0	0.268292	0.255746	0	0
CHIA	0.177801	0	0	0	0	0	0	0	0	0	0.221524	0.200357	0.359705	0.193771	0	0.421877	0	0	0.204634	0
ZC3H11A	174.052	180.024	157.192	186.086	171.859	84.7812	83.8089	76.9525	82.6536	79.8476	81.8541	82.7576	96.3044	95.8833	84.476	102.387	85.6699	97.6557	81.0874	96.7285
MAF1	49.8172	44.9001	44.905	45.8901	45.1546	52.3522	59.3369	51.7458	70.675	47.0112	34.8569	35.4377	40.2325	39.0917	44.4126	38.0686	36.1074	41.9028	30.9601	39.4751
TRIB3	81.3412	85.4292	80.7564	87.4533	87.4116	153.045	156.349	174.268	144.92	172.785	147.762	150.957	139.169	147.681	137.085	75.7765	82.3397	59.3455	72.7201	75.4101
PNP	1.08523	0.436693	0.272252	1.35199	1.11906	185.705	105.129	196.49	131.818	162.021	126.124	133.45	142.966	130.3	156.09	57.8631	50.541	40.1123	44.8417	54.8967
C20orf96	4.2319	2.62348	4.52759	2.45584	1.69235	1.49755	0.764604	1.81425	1.24409	0.431594	0.820446	1.484	0.666965	1.07801	0.36403	0	0.388653	1.10996	0.378707	0
REM1	15.2862	19.0617	17.3035	15.7691	16.5074	5.3347	3.9639	4.97768	3.01955	4.99206	1.75857	4.61264	4.28197	4.15186	2.18197	7.86909	6.97842	5.86677	8.12369	5.21423
RBM39	47.0263	47.9762	46.5561	51.7043	49.1608	151.331	159.88	173.127	174.596	146.963	174.399	192.378	195.62	179.546	171.001	152.843	153.238	154.723	128.355	153.366
NFS1	162.764	168.129	156.099	154.104	170.3	16.081	11.2193	12.4689	20.7126	15.9453	8.54339	8.69297	10.2305	9.71439	8.1412	12.2024	11.5076	11.5553	11.4437	9.95433
DVL1	0.830621	1.3361	1.03803	1.85465	0.853218	0	0.388032	0.365828	0	0	0	0.187033	0	0.361728	0	0.590699	0.390901	0.745842	0.191034	0.219028
MXRA8	1.51981	3.05336	1.13423	2.62506	1.683	0.577741	0.472267	0.777083	0.887156	0.923508	0.753012	0.908115	0.610963	1.097	0.889571	1.79198	1.30357	2.26303	1.04373	1.99277
PLEKHG5	24.0546	21.0321	20.1215	19.7012	19.5485	0.615679	0.471869	0.516898	0.505733	0.438727	0.500884	0.226524	0.338568	0.583574	0.221844	0.0794538	0.315155	0.150523	0.308605	0.0883428
SYT6	1.40742	0.771414	1.11617	1.89847	0.491436	0	0	0	0	0	0	0	0	0	0.140729	0.151184	0.300023	0.286367	0.440183	0.33629
OLFML3	0	0	0	0	0	0	0	0	0.320016	0	0	0	0	0	0	0	0	0	0	0
INAVA	0.288339	0.2898	0	0.178508	0.924039	18.938	20.5262	19.4924	20.2675	18.0832	22.5743	27.3856	25.5934	26.9465	21.2773	24.3923	27.4236	26.4928	23.1735	24.4746
RNPEP	21.0946	19.5488	19.7944	22.9803	21.6798	13.6739	14.4939	14.1487	18.5989	16.0356	3.90591	3.86919	4.98205	5.04216	5.11032	1.59377	2.10903	3.5218	1.71835	1.77275
CYB5R1	33.1012	39.7834	41.5363	25.4733	41.2508	4.07205	2.59961	3.93056	5.33179	3.50501	3.05503	4.52136	4.737	3.40252	2.70905	3.43862	2.62717	1.75313	2.30855	3.23745
ADIPOR1	177.631	161.9	180.024	167.18	176.577	18.4035	12.4163	14.8744	26.7187	16.6873	17.1939	21.1906	23.4652	19.6626	18.2537	20.508	21.0683	19.9326	15.8847	23.8118
RABIF	39.5126	31.8946	35.0243	38.9827	31.6952	12.8234	8.84824	9.06067	16.8734	8.78066	12.8994	17.156	12.3342	13.2901	12.1181	14.0969	15.4505	16.424	13.661	17.703
KDM5B	62.441	67.0645	53.0082	67.643	70.1605	20.3506	20.7196	21.6145	26.9748	22.9443	32.6624	32.49	31.7784	35.3019	34.9208	51.0875	54.6563	39.1396	49.5324	51.8894
IPO9	86.5102	88.1685	87.9172	84.9623	91.1317	60.9481	65.3791	69.1021	65.8674	69.3156	52.1699	56.9947	60.4853	68.3442	53.9294	44.5789	41.9428	32.2906	40.9857	42.8893
SHISA4	5.35734	5.44924	4.92148	4.96541	5.58733	0.396256	0.323944	0.532329	0.43403	0.180731	0.171946	0.0777622	0.209209	0.0751258	0.152313	0.736438	0.649145	0.852594	0.39727	1.0008
LMOD1	0.136556	0.274469	0.170288	0.337946	0.174947	0	0	0	0	0	0	0	0	0	0	0	0	0.305839	0.313395	0
TIMM17A	73.1894	61.8183	59.5423	70.1262	65.8488	47.882	46.7933	45.9751	40.8163	42.7807	35.3104	39.8558	36.7104	43.5082	40.5809	58.9201	58.7904	51.2018	53.222	55.6813
ARSF	10.8364	10.3526	10.6193	10.2058	13.8323	1.10464	0.718303	1.06073	1.43108	0.687569	0.436068	0.0986046	0.353769	0.0952789	0.289745	0.830139	0.720443	0.196573	0.604457	0.692325
PHF20	7.63473	7.92512	6.24391	6.44506	6.54548	4.13843	4.8334	2.94797	4.6589	4.04169	3.39684	3.82607	3.17074	3.9197	3.34923	4.26969	3.14471	4.91126	2.4879	4.88265
NDRG3	5.40146	6.38804	6.15137	4.13592	5.50458	2.90505	4.26634	4.7203	4.59183	6.23441	3.16235	3.03898	3.52971	3.8028	4.90524	4.51649	4.29612	5.70282	3.83443	4.18659
TRPC4AP	213.296	226.311	185.949	208.453	213.697	138.559	153.364	160.897	171.609	145.213	112.432	116.279	114.27	126.258	106.303	72.4554	71.2274	59.3759	67.2155	71.618
MYH15	0	0	0	0	0	0.25292	0.452316	0.485127	0	0.648494	0.274223	0.186027	0.111204	0.419289	0.121445	0.391473	0.0646913	0.0618048	0.126722	0.0725409
SNAI1	130.259	130.615	134.336	151.506	138.506	300.991	314.172	307.426	316.211	285.062	288.365	302.473	300.522	339.898	347.321	202.874	203.163	285.567	160.418	200.807
TP53INP2	2.19619	1.01908	1.68933	0.419224	1.73571	79.5776	71.4304	67.9091	57.7932	68.7829	123.679	107.677	114.238	116.822	120.074	122.171	99.0085	153.056	108.813	115.629
TOP1	484.315	473.935	441.753	444.534	449.62	767.076	735.491	737.861	764.099	702.452	943.287	982.307	991.452	965.976	920.719	842.455	807.814	826.126	756.886	891.032
ZHX3	11.1175	13.3025	8.12682	10.292	10.3594	1.70703	1.74435	1.12114	2.95342	1.53725	0.974985	0.705493	1.8191	1.70409	1.55469	1.5776	2.20881	2.28542	2.25255	1.54781
FAM83D	75.9653	60.1699	78.3085	73.2197	73.363	33.9324	38.3544	33.0192	41.2788	36.7705	37.1329	36.7838	35.7247	46.9079	50.8498	35.3555	30.4504	29.7615	26.1368	33.9173
ADNP	299.272	330.058	297.325	310.88	306.327	136.307	140.565	145.575	165.19	136.94	137.975	129.968	140.589	144.939	135.463	146.01	149.884	125.182	137.949	144.738
GATA1	0.180187	0	0	0	0	0	0	0.198611	0	0	0.449076	0.203083	0	0	0	0	0	0	0	0
KLHDC9	192.513	191.561	156.325	199.463	197	151.812	154.308	165.224	166.984	138.908	117.733	114.562	132.136	133.332	118.909	132.768	130.38	141.289	102.671	136.627
OPN1LW	0	0	0	0	0	0	0	0	0	0	0	0	0	0	0	0	0	0	0	0
OPN1LW	0.211521	0	0	0.263393	0.272531	0.484447	1.23713	0.70113	0.266956	0.277865	0	0.238969	0	2.08072	0	0	0	0.714779	0.244039	0.27997
GNL3L	8.07087	8.90909	8.13638	6.85497	10.1339	27.4864	28.0779	27.3742	27.7921	25.3121	47.404	52.6485	44.277	41.4726	42.0282	71.1053	59.6889	61.7928	67.3808	64.2752
TFE3	4.58011	3.91703	3.73758	2.85586	3.5454	0.787253	1.07216	2.02694	0.868303	0.602513	0	0.259067	0.232663	0.501358	0.762049	2.18253	1.35494	1.54985	1.05819	1.21427
CXXC1	171.53	193.453	166.692	186.163	189.076	31.8912	30.1206	37.2976	42.8166	30.7839	32.1164	40.7062	31.3956	32.2963	34.4739	30.5813	35.7289	34.0813	29.8698	35.1768
MBD1	108.929	111.727	92.7174	114.564	122.211	31.6244	32.2024	31.1124	35.6385	28.1053	42.4219	43.0991	39.3347	44.4529	34.8477	45.1311	46.8981	45.7463	34.9185	45.7845
CCDC120	11.164	12.4285	10.8252	13.5167	11.4004	1.63589	2.31476	2.47402	2.75497	1.2906	0.682179	0.740439	0.49795	1.13246	1.26888	0.908934	1.35182	1.353	2.01757	1.01056
COMT	0.343697	0.17278	0.644549	0.213276	0.441501	0	0	0.1893	0.216187	0.22503	0.428022	1.35494	1.04246	1.12313	0.758833	1.83401	2.02291	2.12269	0.988493	1.8135
GRM6	0	0.0821918	0	0.100807	0	0	0.0953046	0.0895377	0.204422	0.106401	0.101225	0	0.082116	0	0	0.0963476	0.286665	0.182521	0.280633	0.107134
OTUD5	76.1451	66.2678	63.0973	66.5856	66.7678	22.8181	18.6097	26.2266	27.6309	24.3702	19.21	19.6407	22.0364	19.1758	23.5061	28.0332	27.2353	32.7599	26.0404	24.1068
MON1B	48.8673	52.5426	47.4409	58.6096	51.5426	9.15901	10.5844	12.2537	14.826	11.5752	10.0642	9.10294	12.3921	9.4175	11.5392	11.1578	12.2973	12.5965	8.86243	13.0343
BRPF3	13.9781	16.5038	12.2827	15.3618	12.7812	1.98988	3.08785	2.2626	3.79326	2.77258	3.27733	4.04886	4.47368	3.14309	4.03593	4.64077	4.22459	4.68419	3.91539	3.38353
TMEM51	105.952	127.671	123.13	129.545	119.152	4.26335	5.35875	10.155	14.8673	7.54813	1.07632	3.8937	2.91556	1.25659	2.54627	2.39254	4.75584	2.5885	1.65633	4.56502
PRDM2	23.1391	26.9589	20.0776	22.8246	24.8473	11.1101	12.2185	10.5446	12.097	8.80247	9.41444	11.7225	9.96538	12.2308	9.90859	14.1376	13.4398	14.8252	11.6959	15.6533
PPCS	13.6468	10.4743	23.4164	18.3835	12.2461	6.3526	8.39481	7.24314	10.3476	5.16923	3.27552	4.0732	4.32698	2.86919	3.63334	4.2914	3.10326	1.8464	3.77985	3.04009
UTP3	57.1361	61.2375	55.2845	65.6339	63.0903	89.2405	99.0712	94.1092	93.0425	99.3111	105.691	118.695	116.833	110.294	104.503	103.769	120.533	136.721	98.4944	111.719
CPNE1	29.3439	27.5086	26.5184	30.7799	32.5937	37.2775	36.5716	44.1669	34.7009	36.1231	31.2507	33.4809	35.7385	33.0588	35.9624	20.7457	29.1786	22.7687	25.5748	24.7782
RBM12	46.3569	43.7036	39.8156	45.0634	41.6534	148.837	150.938	150.723	154.629	151.377	135.976	137.619	155.419	154.996	141.164	115.194	123.568	127.529	88.8995	119.602
C20orf173	141.391	144.997	145.565	151.695	150.34	24.0593	21.7946	21.4507	32.0007	21.3384	16.8271	17.0096	18.2859	13.4229	16.4548	26.1576	22.9319	18.9669	19.8857	26.48
DYNLRB1	2.01098	1.0152	2.57633	4.49285	3.97442	4.65678	9.50555	4.54531	3.24962	8.79167	4.49651	4.64709	2.61508	2.25462	3.99527	4.9004	7.32295	27.2376	4.74039	13.65
MAP1LC3A	0.516263	0.259815	0.324765	0.968114	0	7.99519	8.16579	5.72463	5.88642	7.82852	8.08998	8.78003	11.3051	7.93167	11.194	16.9534	14.3948	9.92214	11.3553	12.0062
CFAP92	0.191209	0.0960297	0.118867	0	0.24421	0	0	0	0	0.12443	0	0	0	0	0.104873	0.112674	0	0	0	0
ACAD9	34.203	44.6176	40.7346	37.6693	43.0768	2.18179	3.52921	2.80109	4.19835	2.91342	1.58336	2.68516	2.89195	3.28878	2.28059	2.63827	3.36684	2.6769	2.19413	2.93467
IQSEC1	13.2816	12.6232	11.6966	15.0075	13.1925	0.803409	1.07763	1.39594	2.0877	1.02949	0.326512	0.541442	0.353054	0.522956	0.289181	0	0.0513425	0.0981178	0	0
HDAC11	43.321	40.63	39.6402	38.3836	39.3473	5.24958	4.4153	5.37511	8.52981	6.39205	1.35041	2.13731	1.09725	1.18225	1.19787	1.28639	1.59789	0.913384	1.24696	1.78958
FBLN2	0.683831	0.436914	0.462633	0.611569	0.871188	0.212376	0.217029	0.203731	0.387577	0.161389	1.15161	1.3194	0.996334	0.737914	0.816057	8.18373	8.33214	7.54439	6.45689	7.47424
WNT7A	0	0	0.132577	0.131509	0.136193	0	0.124179	0	0.13333	0.277585	0	0.119417	0.214254	0.34623	0.233965	0	0	0	0.121998	0
PTPDC1	10.7795	10.2096	9.70567	9.62704	9.9703	0.936666	0.358904	0.674955	1.15585	1.06952	0.381527	0.230056	0.619119	0.666986	0.338041	0.968475	0.600446	0.458643	0.822614	1.077
BARX1	0.549154	0	0	0	0	2.20626	1.93134	3.35339	2.08996	1.45015	0	0.623412	0.560107	0.603503	0.305734	0.328323	0.652558	0	0	0
PHF2	5.20627	4.42769	4.55785	4.36819	5.85197	1.67391	0.926568	1.20429	1.52735	1.58999	1.66402	2.39449	2.26989	2.70966	1.80893	4.24722	4.78243	5.45517	5.24284	5.68271
FAM120A	5.3136	5.67737	4.39556	4.6097	4.16767	3.18128	2.69589	3.05249	2.71947	3.27334	2.44089	2.05551	3.00396	3.01547	2.83318	4.32586	4.7663	4.55289	4.58942	5.34426
CASS4	0.97362	2.20111	1.06121	1.50405	1.71318	0.416694	0.567669	0.667749	0.609927	0.634907	0	0	0	0	0	0.287465	0.427827	0.136129	0	0
CSTF1	307.204	319.039	339.256	341.322	335.591	384.578	384.736	399.513	402.984	394.819	400.442	391.037	392.945	399.242	394.801	240.354	235.733	216.646	242.801	232.891
EIF4G3	46.0321	51.3695	40.1586	46.1883	46.8543	25.066	30.922	30.6754	31.5504	28.6967	11.1284	9.30491	11.4392	11.9274	8.76782	3.9408	4.82296	4.84126	3.94669	4.03909
ECE1	59.8035	54.6353	50.3569	55.5884	56.8899	32.9558	27.855	28.1751	29.5084	29.057	9.34524	9.40499	8.86424	11.6206	9.21327	1.75412	3.72886	2.37342	2.79735	4.45878
ALPL	0.0704605	0.0707512	0.0874453	0.0867055	0.449107	12.6813	10.5804	9.70442	10.8137	10.1589	10.884	8.26941	11.6537	12.5543	9.40994	11.1878	10.3549	13.3449	8.52975	14.6512
LACTBL1	0	0.638221	0.198249	0.787068	0.814743	0.725599	0.370647	0.34933	0	0	0	0.178599	0	0.172695	0.175026	0.188014	0.186616	0.178049	0.182424	0
EPHB2	28.4362	29.2313	22.0127	29.0755	29.4192	2.92394	2.39053	3.12984	6.29132	2.44218	0.792167	1.09867	1.242	0.553639	0.982227	0.201033	0.1993	0.380877	0.536933	0.391123
DHRS3	0.432477	0	0.271225	0	0.278709	29.7203	28.5872	26.0519	33.8537	39.2153	67.5523	90.9116	81.8557	85.8287	96.7979	147.199	197.564	141.325	169.955	153.186
AADACL4	0.24612	0.247687	0.928142	0	0.317944	0	0.288243	0.272661	0.623	0.972653	1.23302	2.23034	2.50417	1.07925	1.36696	2.34891	2.33358	1.38993	0.854012	0.980204
CFAP107	0	0	0	0	0	0	0	0.246138	0.281167	0.292653	0.55654	0.755027	0.226011	0.243511	0.740272	0.265025	0.78969	0.752803	0.257005	0.589776
KLHDC7A	0	0	0	0	0	0	0	0	0	0	0.0766644	0.069343	0	0	0	0	0	0	0	0
IGSF21	8.80802	8.05498	7.16937	8.36718	9.24242	1.4172	2.10624	0.866833	2.68626	1.32456	0.97998	0.633121	0.795195	0.36715	0.744295	0.26654	0.264432	0.378668	0.129358	0.296422
ARHGEF10L	0.836301	1.13325	0.880384	0.564661	0.904236	0.475805	0.291755	0.182433	0.26027	0.32514	0.309366	0.419736	0.459949	0.405396	0.273991	0.637889	0.681027	0.743721	0.428911	0.70917
CHD5	0.145903	0.146442	0.0903148	0.0447584	0.0927602	0.0414969	0.296864	0.198843	0.181552	0.236253	0.314714	0.406661	0.218749	0.157099	0.358352	0.427848	0.169653	0.202653	0.332446	0.285388
RPL22	41.4954	54.054	49.1229	46.1784	43.3086	215.293	240.381	186.98	180.639	218.177	224.698	284.846	217.804	241.496	254.463	439.977	373.318	407.361	461.597	393.598
RNF207	0	0	0	0	0	2.39157	0.610194	1.16779	0	0	4.62103	2.38787	4.83809	6.37276	4.69292	1.88866	2.50911	0	6.08921	2.80595
NR0B1	0.537734	0.270657	0.677079	0.336433	1.39173	0	0	0	0	0	0	0.305091	0	0.29533	0	0.321346	0.319326	0.304222	0.622993	0
PLEKHA3	61.0998	50.7911	51.8357	56.8415	56.0494	5.32985	4.17464	6.32864	9.76615	4.87958	2.7072	3.84773	3.61022	3.88953	2.39951	3.31404	3.8375	3.31279	2.85832	3.68631
RPGR	3.24521	2.37597	1.67777	2.57846	2.24035	1.23207	1.10167	0.812743	1.09639	0.79017	0.584706	1.66215	1.1518	0.729893	1.40583	1.59	1.34019	2.03325	1.00355	1.14913
DYNLT3	59.63	45.1573	50.9613	56.4744	46.4139	19.4983	25.7157	18.9179	22.5249	22.9732	22.7246	18.1336	25.7242	20.3014	18.9832	35.2431	34.6307	36.9743	34.9604	37.8205
CYBB	0.103668	0	0	0	0	6.14822	7.97355	2.04486	5.57696	6.61553	5.13728	7.31835	6.2524	7.29713	5.68971	4.89022	7.15536	7.87396	5.93383	6.38992
XK	0.930674	0.23411	0.584368	0.290245	1.5013	10.1328	19.3377	8.49726	14.4134	15.6144	22.4153	23.9589	27.4292	30.0628	21.9435	36.5988	36.9056	23.1013	27.4226	42.8843
GRPR	0	0	0	0	0	0	0.752539	0.357047	0	0.424683	0	0	0	0.353572	0	0.769229	1.14722	0.728134	1.86329	0
VEGFD	0	0	0	0	0	0	0	0	0	0	0	0	0	0	0	0	0	0	0	0
PIR	0.989213	1.82322	1.03009	1.02246	1.27004	0.376937	3.08066	1.08909	2.90204	2.37346	0.410418	0.185602	0.166588	0.179478	0.181897	0	0.193951	0.185033	0	0.4347
IL1B	0	0	0	0	0	0	0	0	0	0	0	0	0	0.24085	0.244062	0	0.26035	0.496394	0.254205	0
ACE2	1.54443	0.646644	0.802012	0.795747	1.3183	1.32233	1.50116	1.97829	0.484029	1.3436	0.159751	0	0.90752	0.55869	0.424704	0.30417	0	0.864219	0.442804	0.507443
NHS	1.25232	1.50832	0.708708	1.22927	1.04635	14.613	16.2239	12.9508	15.2259	14.6457	9.48145	11.3284	11.4078	13.2907	11.8729	5.79142	5.61626	5.20801	4.89138	5.59861
SCML2	6.0286	3.80579	5.88524	7.10988	5.16609	37.8898	33.7022	33.1765	36.3668	31.0253	44.5394	43.3694	48.2347	46.2827	46.9158	53.4492	51.503	57.5432	46.8704	52.8929
CDKL5	2.49941	2.51022	2.24876	2.54872	3.40996	0.392932	0.100379	0.282965	0.107674	0.112088	0	0	0.0865066	0.186387	0.0944684	0.304492	0	0.096137	0.197081	0.112862
RS1	0.28144	0	0	0	0	0	0	0	0	0	0.353454	0	0	0	0	0.336717	0	0	0	0
PPEF1	5.90283	5.93026	4.71348	7.42619	5.55419	0.508244	0.389481	0.97696	0.557699	0.43541	0	0	0.112026	0.362065	0	0	0	0.124476	0	0.146158
UGT1A1	0	0	0	0	0	2.06175	2.63299	2.64608	2.2662	4.12816	5.23511	4.56584	7.58808	4.74155	7.45703	12.8169	14.3105	11.9693	4.49105	11.6822
UGT1A1	0.140288	0	0	0	0	2.72376	3.76499	2.62076	2.81651	2.56534	2.44	3.15271	4.52657	3.65753	4.3249	6.30536	10.5386	8.80008	5.95784	9.78149
UGT1A1	0	0	0	0	0	0.520018	0.265581	1.50613	0.860254	2.08925	0.283791	0.770006	1.15252	0.745058	0.503322	0.810865	0.26847	0	0.786297	0.902252
UGT1A1	0	0	0	0	0	1.01932	0.520589	0.491957	1.40492	0.87739	0.556179	0.503025	0.225864	1.21676	0.246597	0.264853	0.263059	0.752315	1.28419	0.589393
UGT1A1	0	0	0	0	0	0.77093	1.57491	0.496137	0.283374	1.1798	0.280453	0.507299	0.227787	0.981699	0.248696	0.267105	0.795904	0.505806	0.518037	0
UGT1A1	0	0	0	0	0	0.514287	1.05062	1.24115	0.56712	1.77086	0.280636	1.01526	1.59556	1.47351	1.99087	2.6728	1.32738	0.759206	1.03675	1.1896
CFLAR	26.7466	26.8893	25.7893	25.3936	21.8336	3.39727	3.27788	3.81728	5.18967	3.24119	1.43853	2.04456	1.33462	2.33657	2.00375	2.54375	2.33077	2.96479	3.41721	1.08831
TMEM169	3.63164	3.65867	3.75822	2.90694	5.58015	7.97507	9.30691	10.6757	10.5185	9.19549	14.5667	9.40989	12.5189	9.84367	9.23347	28.9496	28.7865	23.2731	23.821	33.9941
PECR	0.393036	0.790579	0.738404	1.7108	1.01165	1.34949	3.21657	1.95195	2.72489	1.80491	4.16832	3.10471	1.79193	4.71932	3.04344	5.60395	5.79633	3.31649	2.71779	4.4162
MAP4K3	16.2267	13.1695	11.4055	14.5928	15.6837	0.759716	0.690076	0.81014	1.47964	0.866425	0.641118	0.331364	0.297176	1.04047	0.730199	1.56911	2.76636	1.734	1.69284	1.74471
TMEM178A	0.163863	0.164734	0	0	0	0	0	0	0	0	0	0	0	0	0	0	0	0	0	0
SLC8A1	0.968219	1.02313	0.568382	1.00169	1.03786	0.522045	0.652056	0.556201	0.444384	0.462616	0.251519	0.34125	0.203985	0.49443	0.389851	0.179527	0.237325	0.0566872	0.290581	0.0665321
MAL	0	0	0	0	0	3.24565	4.42016	3.39578	2.68567	4.65892	3.24846	2.93799	2.39883	2.06768	1.57138	1.40637	1.95587	1.06524	1.36366	1.87793
MAL	3.25224	5.15752	1.78059	1.18238	3.66207	2.68579	6.03122	5.75846	5.38842	4.98416	10.6534	12.3102	7.22596	8.82544	7.886	5.07863	8.429	1.06785	7.64474	10.0578
PGAP4	75.058	74.2737	66.4161	80.3076	73.9448	8.00314	7.94054	9.58346	11.9587	6.22437	5.66914	6.15317	5.31524	8.14881	5.91591	6.83552	7.25652	7.61009	7.79965	7.86817
CSNK1A1L	1.443	1.52143	0.895527	1.06556	1.47179	0.493147	0.167979	0.394379	0.270108	0.281184	0	0.16131	0	0.155845	0.0789909	0	0	0	0	0.0943683
SLC22A7	0	0	0	0.232682	0.240805	0	0	0	0	0	0	0	0	0	0	0	0	0	0	0
WDR83OS	79.2232	80.0109	100.315	75.1616	81.7095	136.794	119.13	111.662	127.065	125.852	128.93	147.56	127.419	113.748	127.705	160.744	164.645	188.419	170.33	155.57
CACNA1A	1.90683	1.91398	1.85895	2.19122	1.96091	0.369302	0.471771	0.176989	0.252501	0.157718	0.200089	0.226228	0.0405652	0.174797	0.132906	0.0476038	0.0471922	0.0901905	0	0
IER2	1.19887	1.21194	0.773539	0	1.59155	68.9643	66.8121	78.4997	69.5288	56.0848	36.2725	23.0296	22.6414	28.47	13.7243	16.9343	7.34295	14.624	9.25086	14.7734
NACC1	12.6976	14.2073	9.95217	13.9644	14.7908	1.94253	2.4812	3.45046	4.79056	2.77052	1.05428	0.762867	0.94081	1.56637	0.2802	0.301049	0.796222	0.285151	0.389709	0.557928
TRMT1	49.0998	43.8417	38.8361	46.0813	44.6203	27.7339	29.9683	33.7935	32.2074	27.3853	20.8389	21.2756	22.4206	20.8419	20.8451	14.5785	17.8952	16.5115	17.7955	17.5512
MAN2B1	50.9463	55.7643	51.5041	64.4035	58.6105	28.8752	25.8768	27.1756	27.0012	31.2156	15.2971	19.7657	17.2096	16.4052	15.2621	16.5193	14.9305	13.9077	13.7789	13.88
SIPA1L2	75.1206	85.9196	61.7448	79.187	79.8013	16.8356	14.6584	15.6204	21.8205	14.7513	12.5195	13.7676	12.2914	14.2198	12.9564	16.6182	17.4093	14.9103	17.1129	19.6614
EGLN1	55.6586	58.2094	56.3035	49.7186	59.9066	7.33313	5.43149	11.1216	9.27343	6.71503	5.98733	5.59579	4.86032	4.71272	4.0687	11.2116	9.61944	6.83826	10.6937	11.6257
DIAPH3	39.0652	46.3061	30.9091	41.495	43.8633	13.0037	15.8744	14.4918	21.228	14.3341	7.38669	7.19515	9.90986	10.0965	8.6409	2.34355	2.86049	1.62219	1.92539	1.6036
PCDH17	0.266511	0.200698	0.0826657	0.163926	0.169822	0.0758849	0.310186	0.0728085	0.41554	0.0865164	0	0.148901	0.0667648	0.503472	0.291648	0.0783408	0	0.0742074	0.152142	0
NKPD1	0.13747	0	0	0	0	0.627946	0.801959	0.151034	0.344915	0	1.70749	1.23549	0.831487	0.895801	0.453969	0.325122	0.645266	0.769772	0.94654	0.723225
CNTNAP5	1.13678	0.784764	0.881787	1.39893	1.17747	0.0809332	0	0	0.0886538	0	0	0.079417	0.0712212	0	0	0	0	0	0	0.0929192
LIMS1	31.6652	33.1914	30.3207	35.4049	36.0829	54.8831	52.0062	51.1979	55.2259	55.094	64.0333	79.868	70.345	80.0652	76.2129	69.9524	71.4282	96.8689	60.6463	78.7521
THSD7B	0.439075	0.629776	0.311206	0.925639	0.479483	0.428576	0.145989	0.479664	0.547507	0.325693	0.0774672	0.280276	0.251333	0.067689	0.205857	0	0.073108	0	0	0.0819755
SPOPL	57.0993	55.8375	58.6937	57.2138	57.8966	21.8079	20.095	17.2347	21.8801	18.4962	29.6627	27.8813	30.9139	31.7791	30.2786	41.111	40.7877	34.217	43.5304	44.4893
PHKA2	0.247532	0.0993947	0	0.0608137	0.189031	0.0563485	0.11517	0.0540287	0.493333	0.19259	0.183242	0	0	0	0	0	0	0.11013	0.112907	0.0646276
COL6A2	0.240693	0.302068	0.223868	0.0739829	0.153296	0	0.280075	0.197169	0.37509	0.234285	0.148603	0.336028	0.42185	0.454449	0.263254	0.28286	0.0701178	0	0.0686701	0.157247
COL6A1	0.0632592	0.0635144	0	0.233391	0.0805977	0	0.0736173	0.0691098	0	0.0821203	0	0	0.0633713	0	0.0692064	0	0	0	0	0
TDO2	0	0.351985	0.218887	0	0	0	0	0	0.220255	0	0	0.197201	0	0	0	0	0	0	0	0
ATP13A3	2.17588	2.44954	0.899831	2.35209	1.34439	0.225284	0.537174	0.216145	0.575681	0.256839	0.407262	0.294694	0.132135	0.640559	0.577203	0.155045	1.07621	0.734326	0.526941	0.51717
TMEM44	12.6539	12.4809	10.8219	12.0176	11.7759	4.64426	6.81869	2.8052	7.05077	5.00358	3.17142	1.72097	1.80356	1.94325	2.81287	0.604173	1.20055	1.14401	1.46434	0.672349
LSG1	86.4726	91.6433	78.0217	87.639	88.7254	57.9769	67.501	76.5149	70.5835	61.4849	37.1423	36.983	36.7538	36.178	31.616	32.8789	38.473	40.539	31.3068	44.8476
FAM43A	0.305098	0.153338	0.76181	0.567048	1.95673	0.871521	1.06846	0.671172	0.958037	0.797795	1.70726	1.54415	0.769892	2.15658	2.35385	4.33467	5.01919	2.90771	3.15452	5.826
XXYLT1	22.2153	22.0168	21.6864	24.4324	17.865	1.96661	0.730605	2.58195	2.16221	1.63686	0.778398	1.23205	1.42168	0.510555	1.20738	1.1117	1.83901	0.526393	0.539335	0.824388
PIK3CA	7.37085	8.93417	7.68352	8.87229	9.40627	2.60709	3.74939	2.59585	3.91581	2.97462	2.62024	3.22318	3.23101	3.66396	3.52838	4.09021	3.95774	3.49624	2.71198	3.54979
ZMAT3	3.14107	2.21467	3.57139	2.76191	4.48673	3.24984	4.05613	3.14827	4.79722	2.91243	0.395478	1.073	0.642926	1.03914	1.40367	1.13042	0.374618	1.07004	0.365112	0
PFKFB4	64.9178	61.8677	55.7695	63.5591	64.8661	2.85569	4.16756	3.73453	6.50989	1.40196	2.66655	2.81372	3.06701	2.52686	3.54577	5.71305	4.41134	5.00923	2.87377	1.8831
DNAH1	0.175518	0.117434	0.21718	0.17937	0.18588	0.465792	0.306027	0.573775	0.436551	0.30298	0.468479	1.04307	0.613643	0.56661	0.893577	0.411515	0.169962	0.0974604	0.133239	0.266859
CHCHD4	121.387	101.958	129.274	122.266	114.09	34.664	41.8661	38.9512	36.9343	36.1745	32.2224	32.5396	29.2758	36.7277	38.1519	43.5143	35.6692	35.3643	39.6456	34.21
SLC38A3	0	0.0335617	0	0.0820444	0	0.114115	0.194374	0	0	0.129921	0.0824144	0.111817	0.133659	0.143984	0.182466	0.392137	0.388719	0.520073	0.45706	0.784692
GNAI2	58.3877	55.9434	63.1818	62.3436	59.7631	42.2763	44.1971	48.7247	46.0946	46.2946	53.6587	49.8223	52.523	53.624	51.3479	63.6466	58.2787	56.7397	61.1037	68.3379
INKA1	4.87091	4.14468	7.73802	10.0108	5.05965	243.062	237.789	330.166	211.906	198.71	28.7307	29.3656	36.0352	34.3287	34.1682	29.1384	29.5929	25.6963	25.4602	30.6842
TRAIP	47.9297	51.2746	36.5166	41.8471	44.4686	40.8073	41.0558	36.5445	36.9733	38.4854	28.2918	37.3672	33.1792	40.068	37.0236	38.6997	33.9629	35.4317	41.2758	38.7704
MON1A	29.0047	24.9437	25.4778	31.5327	28.2367	3.25202	3.50276	2.78399	5.29662	2.80702	0.762998	1.12146	0.696307	1.08351	1.43632	1.54322	1.71051	1.28979	0.96954	0.706567
MST1R	0	0	0.107324	0	0	0	0	0	0	0	0	0	0	0	0	0	0.100893	0	0	0
CAMKV	0	0	0	0	0	0.139689	0	0	0	0	0	0	0	0	0	0	0	0	0	0
SEMA3F	6.9788	5.44283	5.40997	5.90008	5.39808	0.993391	0.725112	0.54455	1.55392	0.647063	2.53945	2.57535	2.87114	3.02578	2.24939	7.17747	8.13371	7.07635	6.47194	7.65454
ARL8B	52.4164	55.7867	44.1624	51.7999	58.7817	16.8886	21.9856	21.3132	29.5174	21.4544	13.9015	14.2483	15.0734	21.1154	15.6304	22.5221	16.6931	17.9724	18.3914	16.7181
BHLHE40	0.131962	0.13261	0	0.6529	0	0	0	0.289842	0	0	0	0	0.797796	0.2865	0.145193	0.779889	0.6191	0.590888	1.36238	0.520439
ITPR1	10.0469	9.31114	9.3968	10.6186	10.4905	1.16802	1.23633	1.43921	1.77945	1.75748	0.587548	0.613204	0.806305	0.552743	0.280186	0.12903	0.25582	0.407441	0.0417746	0.143446
BRK1	75.4157	68.3185	67.4096	61.1304	67.933	75.7798	67.341	72.6785	72.1629	72.7074	75.9716	70.7739	66.7575	68.7891	74.3268	103.737	102.767	91.7424	94.5431	109.57
GPX1	24.1542	24.8768	21.6878	21.2074	22.6497	30.9164	31.2488	28.9821	30.6495	38.1332	27.8858	24.2743	27.1916	23.805	25.0466	32.8741	31.6805	24.2056	36.6919	32.8922
GRM2	0	0	0.0848628	0.0841429	0	0	0	0.149488	0	0	0	0.07643	0	0.0738379	0.0748512	0	0	0	0.078093	0.0894221
RRP9	193.525	227.814	192.034	204.244	210.681	136.208	130.051	130.241	150.567	113.75	126.083	127.323	159.472	148.415	114.16	143.881	162.39	168.561	133.541	158.546
NFYA	25.6007	26.1807	26.9372	30.2358	29.2021	177.526	180.329	158.595	177.363	169.837	238.508	239.485	234.445	222	226.641	196.781	190.402	214.385	192.314	197.716
SORT1	17.1129	18.5919	16.1022	21.9208	20.0265	9.90634	13.0621	10.5026	14.0012	10.7493	11.3534	8.77973	11.3183	9.92105	10.7481	11.4658	11.6973	12.5016	8.08966	14.4913
PSMA5	137.151	132.328	151.862	150.582	146.234	173.623	172.546	175.753	165.335	173.157	195.29	184.636	194.683	202.605	177.466	184.736	187.129	147.842	208.023	179.222
SYPL2	68.7031	58.2523	62.3354	68.7348	64.6281	38.4294	47.0872	33.8137	41.1334	47.5889	11.1013	11.2635	12.7642	8.35169	9.74885	10.4744	9.29441	11.401	7.93973	9.7057
ATXN7L2	98.8876	109.955	81.9132	102.215	100.029	44.5852	44.62	36.5935	37.1036	38.2748	51.7955	47.2964	41.2303	46.879	42.2352	38.1253	35.4869	39.9865	37.4586	36.2708
CYB561D1	27.2378	30.8524	29.6841	35.1921	27.936	9.44805	6.32172	12.2941	9.0051	4.87365	2.13834	4.19015	3.18575	1.87233	3.47782	0.339517	2.36206	0.642824	0.658137	0.377884
ZBTB40	11.2066	10.8443	8.18532	6.97728	8.14574	3.98671	3.71416	4.28106	4.75888	2.67777	4.20303	6.22074	5.27033	3.67388	4.85245	7.7593	6.735	5.85638	5.17839	7.28054
USP48	28.9626	26.9338	24.0438	26.5788	27.0259	6.60045	6.92953	8.33223	9.70964	7.2198	10.1066	9.76264	12.2581	12.0908	9.12713	19.1458	21.3034	17.2504	16.1408	20.7697
LDLRAD2	0	0	0	0	0.26455	0.235185	0.24024	0	0	0	0.256481	0	0.208283	0.448813	0.227408	0.732762	0.485113	0.693837	0	0.815264
CACNA2D3	4.66943	3.53601	3.42152	2.92158	4.19793	0.348864	0.623862	0.41856	1.05114	0.596859	3.40699	5.90639	1.84248	3.06003	4.94637	7.65653	5.53852	5.97253	5.85981	9.21457
CACNA1D	3.15649	3.26174	3.16296	3.87644	2.83522	0.31697	0.863811	0.455827	0.751484	0.842497	0.229032	0.310741	0	0.100046	0.101425	0.054491	0.0540231	0.103237	0.0529213	0.121163
TKT	0.303588	0.304802	0.527104	0.522588	0.232034	0.483967	0.63588	0.596883	0.681299	0.394024	0.0749766	0.135633	0.121624	0.524092	0.199235	0.356789	0.141511	0.473157	0.346469	0.238016
BICD2	13.4116	13.2441	13.8435	14.4411	15.1011	1.70027	2.00454	1.38292	2.2966	1.04592	1.84769	2.44252	1.84531	2.11225	1.88911	3.92374	3.89278	3.3318	2.10125	3.61131
CARD19	0	0.293442	0	0	0.187152	2.33458	1.36295	1.60485	0.916285	1.52606	3.62868	2.29741	1.32538	3.01446	2.89444	5.35495	5.65729	5.56209	6.87255	4.80339
NINJ1	0	0	0	0	0	0	1.83611	0	1.34007	0	1.32437	1.19762	3.23539	1.74342	3.5306	1.263	3.77537	2.98713	0.610797	0
WNK2	0.651442	0.490362	0.322505	0.519418	0.248426	0.111151	0.151461	0.17751	0.202588	0.0421807	0.28095	0.254123	0.325456	0.350598	0.248809	0.0763878	0.416467	0.18091	0.259686	0.382141
ITIH3	0.249583	0.501571	0.621937	0.462789	0.4792	0.14244	0.145535	0.547887	0.469173	0.325591	0.154851	0	0	0.541532	0.274444	0.442252	0.292539	0.139617	0.429228	0
ITIH4	0	0	0.133895	0	0	0	0	0.117946	0.134657	0.140173	0.266682	0.361813	0.216386	0.93247	0.827028	2.79247	3.7776	2.76507	3.57311	3.10546
CRELD1	0	2.81314	1.76795	1.75858	1.81742	0	0.410153	0	0.445403	0	1.32164	0.398419	1.43283	1.15796	0	0	1.2526	0.397353	0.406661	0
HP1BP3	90.0059	86.7627	81.1668	84.4322	85.6477	150.436	162.243	138.849	152.523	157.287	205.694	218.493	200.745	202.026	206.296	285.902	269.474	298.035	231.305	304.041
SH2D5	171.318	158.725	161.098	154.744	162.03	4.56632	3.91866	7.03517	17.273	3.76319	1.19303	2.51776	2.09832	1.91287	2.11492	1.32525	3.00665	0.358574	0.734765	1.68474
KIF17	0.980113	0.615504	1.37359	0.151419	1.72471	0.419485	0	0.268897	0	0.159796	0	0.549914	0.123348	0.132886	0	0.1447	0.14357	0	0.421326	0.64372
C1orf116	0.201615	0.539836	0.750468	0.165354	0.428252	0.229632	0.23466	0.0734425	0.167664	0.17454	0.249085	0	0.20204	0	0.0735471	0	0	0	0.0767334	0.0878639
YOD1	11.2504	12.7493	12.4341	11.621	14.8608	42.8687	42.5715	44.7582	47.0092	46.1822	43.5759	41.2444	44.6274	46.2043	46.9407	41.9322	42.0431	41.3268	36.5265	44.4872
SNRPE	116.002	125.612	145.681	129.043	112.468	325.594	344.351	312.438	287.406	343.87	351.175	335.368	329.966	291.694	321.961	445.464	448.236	518.615	528.345	412.932
SOX13	34.1822	36.024	30.105	36.5885	32.8345	7.50357	7.89567	7.62666	10.8208	7.79206	5.56005	6.2681	5.62094	5.35123	6.99502	8.51288	9.354	14.6019	9.9792	13.1319
ETNK2	12.5178	12.0943	10.7033	10.9472	11.6468	0.861343	0.586495	0.554888	1.58486	0	0	0.567366	0	0.549113	0	0	0	0.848593	0	0.33248
SLC41A1	0.81853	0.939877	1.4561	1.30008	1.49586	0	0.136333	0.256539	0.292899	0.609792	0.435037	0.39348	0.235345	0.380317	0.385489	0.690232	0.13696	0.392235	0.26798	0.460577
KLHDC8A	6.96835	8.00975	5.48702	7.18214	5.63816	0.911551	0.23279	1.31863	1.2551	1.04512	0	0	0	0.869507	0.220288	0.23661	0.23495	0	0.229496	0.263242
CDK18	0	0	0	0	0	0	0	0	0	0	0	0	0	0	0	0.163538	0	0	0	0
MFSD4A	127.68	134.767	129.841	122.856	139.215	38.8874	43.0544	40.4087	45.3043	46.9383	20.2343	16.0369	16.9346	17.88	16.8265	5.36285	4.33763	5.45468	4.6249	4.41896
ELK4	6.01809	7.60896	6.32507	4.99351	5.03891	3.43189	1.57195	2.84264	2.98571	4.1891	3.34223	3.25552	4.17201	5.84295	3.4169	2.56968	3.03466	2.54975	3.20715	2.58548
KLF17	11.5209	11.5003	8.94472	10.112	10.4757	1.76494	1.33308	1.3253	1.933	1.57482	0.665902	0.752884	0.94523	0.800077	0.884792	1.10912	1.33551	0.975552	1.07698	0.968941
SLC45A3	0	0.14289	0.177365	0.880033	0.364442	0.324772	0.165906	0	0.35685	0	0.353307	0.479331	0.143379	0.30894	0	0	0	0	0	0.187067
NUCKS1	361.029	343.965	318.791	370.535	361.864	793.673	935.228	754.167	836.294	822.43	773.361	834.585	882.503	878.25	834.957	869.845	942.565	1063.9	731.743	977.834
CLDN19	0	0	0	0	0	0.222545	0.0758063	0	0.162475	0	0.0804596	0	0.130523	0.351526	0.142541	0.30631	0.379673	0.29015	0.3718	0.0851438
P3H1	0.400427	0.268267	0.499227	0.330236	0.854805	12.1921	11.6782	5.57081	9.03915	13.4169	16.2422	17.9884	19.5037	18.4038	16.4502	40.5511	41.9613	53.0491	38.8946	37.0289
C1orf50	21.7661	26.1792	21.7914	18.1375	18.744	25.4612	28.0608	31.759	30.9236	24.7201	35.9056	36.4809	32.4392	34.9549	33.0485	44.354	38.2321	36.3834	42.9636	38.0948
AP5B1	30.5472	29.8997	31.8746	29.1235	28.0052	1.02503	1.70192	0.985202	2.39023	1.02453	0.974575	1.25926	1.69458	1.82561	1.60374	3.71097	3.6816	3.64026	2.83019	3.68481
CDC42	142.216	132.546	128.514	134.483	141.473	95.1963	103.048	97.4635	106.243	98.3439	79.2271	68.497	90.3706	80.7697	84.9624	91.9068	86.6399	78.1874	85.9638	82.4813
WNT4	1.34048	2.0215	3.14133	1.8709	1.5062	1.53251	1.76132	2.02966	1.47502	0.658014	0.625802	1.8867	2.03215	2.00694	0.554721	0.595872	1.97165	0.75237	1.92704	1.10474
CAMTA1	0.934121	0.468782	0.31134	0.661258	0.776582	0.122618	0.125313	0.0783389	0.0447039	0.186155	0.0442818	0.12016	0.0359087	0.0386828	0	0.16856	0	0.11976	0.0409298	0.0468477
VAMP3	286.542	261.839	271.057	274.393	274.3	385.048	426.485	356.386	370.831	377.169	352.835	392.873	380.818	385.414	380.375	345.556	321.585	378.095	341.874	369.751
PER3	10.066	9.24522	7.43609	11.2606	10.8938	4.37145	5.85047	5.28541	5.99412	4.22593	1.76627	2.00551	2.68161	2.33071	2.12995	0.965567	0.779876	1.05022	0.55578	1.11316
UTS2	0	0	0	0	0	0	0	0	0	0	0	0	0	0	0	0	0	0	0	0
FAM83E	0.42002	0.562833	0.523903	0.519878	0.538244	8.47459	7.18807	6.30785	8.25673	8.41187	9.21843	8.65238	8.04659	10.342	9.09469	8.44529	7.06622	9.09589	9.80249	8.47236
EMP3	6.44444	7.4322	10.5815	9.95379	7.85863	0.532114	0	3.11094	0.592976	2.46821	2.34478	0	0.477106	0	1.04138	0.558885	0	1.58645	1.08168	0.622574
ZNF362	3.30498	2.89367	2.94782	3.44538	2.70361	0.482912	0.789538	0.741852	0.529292	0.440792	0.629012	0.663757	1.70094	1.2827	1.57887	2.39486	2.96903	2.64645	2.422	3.32874
TRIM62	11.0836	11.5053	11.8997	14.3709	15.2904	0.386425	0.789165	0.749339	0.856455	1.33701	0.423587	0	1.37751	0	1.50367	0.403626	1.60551	0.764093	0	0.44935
TRIM62	13.0092	14.925	15.0282	11.3823	13.872	1.16351	1.18852	1.12225	3.33279	0.800541	0.761252	0.459003	0.412124	1.33208	0.449968	2.65817	1.67977	1.14408	0.937512	0.268857
TNFRSF1B	21.9833	22.1729	22.6183	21.7493	20.5217	3.79085	3.87357	5.36002	7.27352	4.32664	1.029	1.13754	1.85516	1.79872	1.41812	1.52361	0.539728	0.92772	0.63392	0.484074
MIIP	14.9874	14.318	13.3657	14.6669	15.179	42.225	36.1281	35.124	37.7561	42.7386	52.089	46.0553	51.7769	58.2362	54.0479	45.5982	49.027	42.3357	39.0534	48.5008
MMEL1	0.102541	0	0	0.126521	0.131033	0	0.358481	0.112359	0.384826	0.133532	0.127025	1.03403	0.618385	0.555163	2.47603	0.846411	0.359841	0.343575	0.469509	0.268931
PRXL2B	53.412	47.7688	50.4329	43.8337	51.2374	24.3244	27.7843	28.0302	26.8277	25.5215	18.5569	24.5295	21.5655	20.2373	20.0004	15.4988	17.2853	24.4576	13.9744	20.2712
SLC45A1	0.738975	1.23753	1.07405	0.152228	0.788144	0.984003	0.143627	0.135167	0.154329	0.481949	0.15281	0.691064	0.372021	0	0.270824	0	0.721694	0.688886	0.423575	0.323581
PTMA	33.742	41.6441	28.2822	23.9635	28.5285	1433.45	1448.76	1158.07	1180.71	1377.93	2240.33	2316.13	2194.47	2318.67	2491.77	3519.23	3477.71	4070.93	3837.45	3620.51
ODAD1	2.21874	1.54435	1.28017	2.11795	1.53454	2.34174	3.58847	1.87988	3.43499	2.01122	1.06263	0.768882	1.89791	2.23066	2.2607	1.01182	2.61151	1.1498	1.57063	1.57579
ERRFI1	7.10797	8.34446	6.25025	8.27877	6.11723	1.90108	1.94176	1.31149	0.599294	2.49507	1.77924	1.34099	1.68616	1.29767	2.10387	4.51907	3.92801	4.27865	1.91703	0.942868
MRPS16	45.548	51.9854	59.7185	58.4705	55.5007	53.7863	47.8294	48.864	39.969	37.5862	36.6706	36.1783	44.5423	35.894	43.1224	50.8349	53.2829	64.0054	59.3401	43.9697
PAX7	0.190646	0.191354	0.23605	0.187175	0.193954	0.0433806	0.177336	0.0415765	0.0949031	0.049399	0.047003	0	0	0.0410608	0.0832548	0	0.0443423	0	0	0.0497276
KCNAB2	18.198	12.1365	19.1868	19.2886	15.7719	7.0143	6.94143	10.7778	6.75828	8.29076	2.86699	0.432171	3.68592	1.88109	1.4827	0.227512	0.225898	0.43087	0.662059	0
MEGF6	0.365513	0.428139	0.302205	0.524329	0.465614	0	0.141776	0.0665412	0.151904	0.0790674	0.0752263	0.136084	0.0610148	0.0657298	0	0.143191	0.141983	0	0.208574	0.0796029
AKR7A2	30.1954	30.6185	32.6315	35.0437	38.0651	18.7793	12.8789	19.1715	18.0536	16.6346	9.37267	10.3312	9.04073	10.5099	9.61066	12.5536	11.9159	9.77275	10.82	9.62301
MRTO4	25.3362	25.5422	34.6106	20.3738	26.5618	140.706	133.718	122.071	121.373	151.88	163.765	166.56	186.556	163.55	156.602	233.891	189.392	262.559	233.67	216.094
IFFO2	2.80914	2.39975	1.40162	1.73857	1.43999	0.641661	0.983361	1.2348	1.40998	1.10077	0.697994	1.42045	1.13302	0.152583	0.309299	0.332266	1.15406	0.157336	0.322438	0.369564
ALDH4A1	3.62722	4.15113	2.82941	3.42945	3.87521	5.38371	7.17136	4.61515	6.74363	6.03287	6.46976	9.62721	9.90452	9.66695	9.15211	14.402	17.4363	14.7705	15.9114	14.7996
ABHD6	0	0.274691	0.687335	0.341545	0	0	0	0	0.3461	0	0	0	0	0	0	0	0	0.308837	0.316214	0
ATP6V1FNB	0.278966	0	0	0.698737	0	0	0.327084	0.309831	0	0	0.35028	0.316795	0.853911	0	0.310735	0	0	0	0.323434	0
SVBP	18.811	18.6564	16.2759	15.1218	21.0919	26.1105	31.6041	24.9494	25.3009	25.5912	37.3738	42.7295	35.5276	29.6364	40.036	36.9474	35.3846	48.3325	46.8802	51.5895
FBXO2	116.316	110.622	102.93	118.114	110.885	108.164	104.042	99.8784	100.284	115.73	85.426	80.8074	97.4366	94.2386	91.0955	134.763	98.2375	146.582	126.872	137.041
PHF13	25.9867	25.5025	23.4903	25.4866	21.5126	8.15466	6.74071	6.02445	11.6196	8.5098	6.38532	8.08464	9.69054	8.20437	6.42236	13.7915	9.68107	9.21463	10.61	10.8381
DNAJC11	0.724197	1.05766	0.408394	0.566885	0.838972	0.074981	0	0.0719391	0.0821154	0	0.0813288	0	0.0659672	0.213196	0.0720409	0.387026	0.0767558	0.513249	0.225489	0.172128
SLMAP	42.0464	45.0357	37.6533	45.034	45.3401	17.827	16.9539	16.446	21.2942	16.0813	20.1165	22.9924	21.8022	21.7825	19.5449	28.1368	29.3915	25.8291	24.3395	31.798
DENND6A	13.7555	18.2415	10.5553	14.1535	13.6819	3.75201	3.83092	7.68789	4.16274	1.92542	4.57456	3.30966	7.81198	4.81022	3.65445	6.53926	4.77007	6.60179	3.8002	2.42699
ARF4	1.20345	1.69544	1.20974	1.50227	2.17561	1.9315	0.56366	0.799601	0.608984	1.2677	0.602658	1.63517	0.734334	0.791205	1.60343	0.861026	0.855359	2.71736	1.3914	0.319377
ARF4	4.31059	4.10849	6.32821	4.77636	4.94633	11.3482	12.3683	12.1184	13.6972	12.6741	14.9333	14.1264	18.009	17.126	20.0299	21.3885	27.0411	19.0224	22.1537	27.7021
PDE12	78.0168	90.1143	91.3335	78.7	92.2375	24.5025	30.8717	23.0207	28.9878	27.6004	23.5789	23.1366	25.284	25.4894	25.2405	26.9004	26.075	23.2669	24.8633	29.2184
RPS23	200.368	195.613	243.538	176.511	212.825	856.356	698.738	694.989	697.751	845.437	850.631	920.571	754.691	885.898	849.088	1341.94	1210.72	855.662	1561.08	1217.69
ASB14	0	0	0	0	0	0	0.826527	1.30249	0.297588	0.309741	0.294504	0.266356	0.239223	0	0.261176	0	0	0	0	0
APPL1	26.9129	33.4836	27.7515	31.9296	35.6418	19.9999	23.7718	27.6	27.5004	29.5061	14.2402	14.2055	23.4611	18.8657	17.0779	12.1634	15.8349	12.4626	9.86627	11.5342
IL17RD	109.107	126.745	112.71	122.044	117.211	56.4894	57.5732	50.9316	61.2453	55.0598	63.399	73.2711	68.4744	73.2343	65.5442	61.9588	63.6453	54.4005	57.871	63.8821
GLYAT	0.192721	0	0	0	0	0	0	0.212631	0	0	0	0.217417	0	0.210301	0.213121	0	0	0	0.222045	0
TDRD3	70.0097	81.9884	61.5045	81.1034	78.3371	22.4219	21.8811	25.1558	25.8818	18.0706	21.7202	24.7333	21.1773	27.3234	21.7401	24.0991	23.6166	30.1502	22.2342	24.3208
PCDH20	0	0	0.127442	0.505636	0.130917	0.350525	0	0.449038	0.128162	0.133413	0.126913	0	0.205945	0.110934	0.449788	0.120809	0	0	0	0.134346
EML6	0.900537	1.46069	1.80522	1.36375	1.58937	0.552331	0.483789	0.605706	0.691399	0.539814	0.342383	0.154842	0.694301	0.448776	0.303289	0.0814673	0.323147	0.540178	0.316421	0.452911
ACYP2	0	2.54758	0	1.70573	1.7478	0	0	0	0	0	1.69606	0	0	0	0	0	0	0	0	1.81578
SPTBN1	24.214	27.4351	16.453	26.6273	25.6358	21.284	27.8986	27.6002	31.7263	25.7081	19.8359	21.3184	23	24.5823	18.4071	31.7095	31.174	29.335	19.7756	29.5351
SULT6B1	0	0.254713	0.31829	0.316252	0	536.413	463.967	430.879	457.659	483.679	650.775	676.053	666.543	680.139	709.124	613.538	566.96	457.031	579.292	655.204
VIP	0	0	0	0	0	0	0	0	0	0	0	0	0	0	0	0	0	0	0	0
SLC29A1	0	0	0	0	0	0	0.0872059	0	0	0	0	0	0	0	0	0	0.0874012	0.0834805	0.0855731	0.0979956
INHBB	0	0	0	0	0	0	0	0	0	0	0	0	0	0	0	1.34187	0	0	0	0.74772
TMEM63B	6.29915	8.5655	5.96879	9.89137	7.77128	0.362083	0	1.05233	0	0.417217	0	0.717314	0.322357	0	0.351892	0	0.375661	0	0	0.420613
CLCN4	6.70724	8.85468	7.86916	7.31994	7.07382	3.75379	3.83528	3.46619	5.277	2.91819	3.26554	3.24894	4.10782	4.42552	4.05147	6.68407	7.40371	3.6804	7.69371	7.77983
SHROOM2	4.14377	3.23604	2.85605	3.479	2.01163	0.449461	0.229652	0.503097	0.32815	0.170804	0.162504	0.220476	0.197714	0.709979	0.359863	0.386659	0.383415	0.366259	0.225276	0.429914
IL1RAPL1	0	0	0	0	0	0	0	0	0	0	0	0	0	0	0	0	0	0	0	0
LDB1	76.7076	82.4094	82.2563	104.603	89.4856	67.8377	70.2357	79.0897	85.0808	62.3672	47.0893	47.3696	53.3774	59.8397	36.6461	49.4257	46.6835	38.6589	31.7363	41.004
SRSF7	2.26146	1.89516	2.12307	1.17107	1.69671	0.215622	0.220267	0.207857	0.474797	0	0.704971	0.425071	0	0.822282	0.416658	0.447543	0.444353	1.48326	0.217064	0.497892
GNB2	170.177	218.447	231.076	223.272	208.988	169.625	254.734	279.469	316.549	301.145	220.355	193.855	263.733	227.743	219.117	158.834	141.486	102.309	100.874	140.91
ASPSCR1	70.868	66.0404	80.0748	76.3045	88.264	55.8129	61.2316	52.8403	62.7527	82.231	56.868	47.7909	53.7611	49.875	54.0813	32.8584	30.5352	28.5005	33.9201	23.7908
LOXL4	0.359076	0.722114	0.224589	0.66889	0.461525	1.02675	1.67824	1.78098	0.452003	1.41147	0.894874	0.607025	0.726548	0.587081	1.58659	0.639089	1.26895	0.605183	1.44662	0.473972
MFN1	26.792	31.7168	18.2207	24.864	27.4414	10.0178	11.0161	11.954	15.3706	10.6645	6.75738	10.3127	13.391	8.87952	8.9953	4.02433	4.80223	4.1901	3.89873	3.58416
ERO1B	17.508	16.9923	15.7312	16.7708	15.5984	4.67341	3.92286	4.08463	5.94252	4.85378	4.52723	5.97849	4.84749	6.25075	6.7375	7.58375	10.17	7.67328	8.28409	8.3366
GPR137B	0	0	0	0.106065	0	0	0	0	0	0	0	0	0	0.186156	0	0	0	0	0	0
NID1	0.0591436	0.178137	0.146681	0.0727106	0	12.1889	10.6668	9.68902	13.0499	11.2826	25.4855	32.2327	30.3839	30.1158	28.2013	60.5339	62.9851	63.2662	52.7772	66.0672
TBCE	16.0278	17.048	15.9005	19.3919	17.0036	8.48321	11.9643	10.4474	12.1896	11.8703	11.9408	11.5046	12.8479	11.1184	11.615	16.1851	14.7076	14.2764	11.9932	14.7014
RBM34	21.0704	23.0027	18.0041	20.1182	16.7668	35.183	43.0198	53.052	39.0801	46.8664	71.749	75.2846	73.9824	79.4656	66.6068	95.2942	88.8177	109.436	84.6438	91.1823
TOMM20	90.1419	101.385	112.091	97.8996	99.4849	69.0298	70.9601	71.338	82.6341	79.8904	98.5757	103.448	93.9227	94.2801	100.638	131.65	131.529	130.765	136.694	121.438
IRF2BP2	16.0429	13.6219	13.1548	15.4942	14.6618	10.3975	11.0383	7.66165	11.2181	10.7428	15.1026	11.8517	15.5074	16.9018	15.5539	28.1275	28.3439	25.2334	28.7228	30.3493
MAP1LC3C	1294.44	1171.66	1401.21	1202.6	1172.23	93.8692	89.6985	112.692	124.242	104.952	23.7653	22.0878	15.5894	18.5389	17.5985	8.18418	11.9183	7.14704	7.91598	7.01488
STRN	63.8378	70.5119	60.2371	68.716	71.9774	49.4213	57.7296	59.4508	63.8307	53.7964	35.6106	28.0013	31.3732	42.3548	37.1013	4.2759	6.51573	5.92978	7.85502	6.28423
PPRC1	71.3258	79.6078	76.6543	78.8012	76.4391	18.0911	16.7004	18.2618	25.2424	17.0097	21.9846	18.7745	18.2885	19.8973	18.4885	19.0141	23.6005	24.8515	21.5534	21.6161
CANT1	0.541399	0.362928	0.677296	0.224133	0.463943	51.192	56.0917	51.1234	55.6608	51.3157	54.1987	47.5961	55.6901	60.9835	59.012	91.4407	85.6789	94.7007	73.9561	87.1922
AFMID	23.5356	27.5202	33.1362	24.6707	30.9106	5.9809	4.277	4.60988	7.89705	6.85004	2.82297	1.37482	3.52596	2.8491	2.88744	3.51512	1.84741	2.74127	3.41017	3.91032
TK1	32.55	33.7922	36.7272	36.6091	34.2861	28.2591	26.6755	24.9683	26.8226	27.9208	30.8999	22.6605	37.8204	35.6341	34.637	30.2129	28.0872	42.318	23.7653	33.4266
SYNGR2	27.1316	33.3387	33.2819	31.9975	36.5613	17.6153	15.453	17.336	17.6917	17.5385	10.008	6.60023	7.78611	6.56497	7.20787	3.57349	3.94138	3.00802	3.08177	1.54588
TMC8	0.100823	0	0	0.124384	0	0	0	0	0.126109	0	0	0.112953	0	0	0	0	0	0	0	0
TMC6	71.8053	76.1351	71.01	79.3662	81.1065	28.139	31.8363	34.5764	33.9026	37.8007	19.3956	17.8128	15.8604	17.3478	15.6005	6.1074	5.91864	4.03557	4.41136	4.26495
EIF4A3	350.389	374.298	353.828	359.872	333.778	548.984	576.165	593.027	576.441	593.312	768.841	798.98	775.967	728.313	692.716	666.194	617.985	627.069	585.587	639.77
PFKL	21.2249	22.0583	15.3486	22.5363	20.7623	18.9395	21.1637	19.3543	20.6588	22.1205	8.93591	9.74433	10.7029	10.5814	11.6883	8.66383	8.43367	7.67966	7.71813	9.89825
CFAP410	2.29408	0.82367	1.63797	1.62582	0.841459	2.43505	2.29632	1.26275	4.12014	1.71548	3.05911	3.50465	3.14559	2.49714	2.35003	3.49531	4.81875	4.04557	6.21728	2.80806
ORC2	16.1701	25.7567	29.6698	29.8624	29.3516	7.76766	5.86322	7.19201	8.59196	8.55352	2.95671	0.668511	4.50551	3.88373	1.96739	5.28162	5.24983	3.33322	1.70621	5.09492
PYCR2	139.377	173.981	165.833	172.73	168.334	66.4946	54.6592	68.3216	64.7324	63.2362	31.8819	33.1468	35.6108	34.7728	38.4485	7.04052	5.8995	5.92699	6.98459	7.65653
MAFG	6.13698	5.90984	5.8954	6.32356	8.34824	0.72976	0.149122	0.701828	1.12188	0.667325	0	0.430585	0.128782	0.416225	0.562499	0.906432	0.449702	0.858465	1.17295	1.17614
CCP110	56.7287	56.7478	64.3404	64.3099	71.4851	20.6643	15.4632	17.214	23.1703	21.6241	23.4165	18.4605	22.2135	22.5481	23.5552	23.7989	21.6713	20.8277	23.0975	23.2859
TRAPPC10	18.9729	23.5986	16.7103	26.0764	25.5534	10.3892	10.195	11.2196	11.601	12.1553	7.08809	6.88359	8.04861	8.93135	8.65757	7.45608	6.97065	7.66818	7.93001	6.63197
SOS1	21.8017	29.6572	18.623	31.5078	31.0606	16.4724	16.7426	17.0793	19.4964	15.473	15.294	13.5739	15.5855	18.1267	17.6976	16.8313	18.4064	15.6843	16.3422	19.7268
SRSF11	269.257	271.214	248.64	304.597	287.191	468.443	525.546	472.86	511.514	504.592	587.185	622.641	555.481	590.832	589.65	631.577	631.174	692.13	574.435	615.157
ANKRD13C	78.9742	82.742	81.327	90.9391	88.6897	72.4226	72.4852	74.4881	72.8774	73.1583	62.3549	50.4385	63.9075	59.1549	61.097	58.9038	68.164	47.0924	64.1457	62.4496
PLAAT1	0	0	0.672207	0	0	0	0.61952	0	0	0	0.670462	0	0	0	0	0.639412	0.637156	1.2098	0	1.425
RFC4	45.6911	47.5118	56.2631	51.3235	49.9966	40.1302	41.8083	40.9596	40.4387	45.2781	34.838	42.0776	28.1079	32.1757	37.5958	39.9721	37.4311	27.9012	37.7793	32.318
GEMIN6	67.1157	65.1643	78.3851	75.8106	67.4816	9.17724	11.0279	9.90569	15.4852	11.1583	2.35765	2.13232	3.11204	3.09511	1.56813	1.40347	2.78832	1.32881	1.90519	1.24937
MAP2K4	84.8515	98.2622	96.7667	107.197	89.596	72.7587	72.2976	67.5713	70.6597	69.0087	77.0087	62.9619	62.309	68.2133	67.2062	59.2674	67.9167	53.8905	67.9875	63.0144
ADPRM	5.93281	7.20208	6.40957	5.34659	7.37655	56.4453	41.8683	52.4134	56.7708	46.1984	64.8747	61.6781	59.5277	65.0297	60.2382	48.8903	43.4777	56.8878	51.9005	47.8998
DNAH9	0.0690528	0	0.0856895	0	0	0.078654	0	0	0.0861498	0	0	0	0.138418	0.0745578	0	0.081208	0.322118	0.0769228	0.0788537	0.180588
PTS	18.1266	33.6529	25.6873	31.3104	30.723	16.162	17.9553	12.4817	17.4428	20.9022	13.0662	16.5429	12.3308	13.2878	12.0661	8.96742	11.4039	13.2007	6.27008	5.54831
FOXK2	80.3135	89.2363	66.6562	87.2782	90.2369	34.0387	29.3575	28.9856	34.0874	31.6397	44.0202	46.4299	47.3602	47.9487	57.5739	97.0643	95.6331	80.8996	85.898	96.3328
WDR45B	33.9432	42.1027	46.2042	50.0325	42.1133	49.8334	45.3022	54.9766	49.9216	59.3458	71.5154	60.9178	62.0903	59.1606	62.4879	65.6304	70.341	51.8254	63.8924	67.2342
GSG1L2	0.308282	0	0.778589	0	0	0	0	1.0295	1.1765	0.408153	0	0	0	0.339786	0	0	0	0	0	0
HS3ST6	0	0	0	0	0	0	0	0	0	0	0	0	0	0	0	0	0.401377	0	0	0
DHRS7C	0.559028	0	0.69965	0	0	1.7055	1.30669	1.84944	3.75515	1.71005	1.85855	2.10119	2.26356	1.82906	2.26553	2.21225	1.09822	2.09485	1.93138	1.47667
SULT2B1	0	0.833884	0.695655	0	0	1.58471	0.971067	2.14604	0.350299	1.45836	0.693203	0.626937	1.12656	1.21385	1.53733	3.632	3.60945	1.87548	4.48058	2.20488
SULT2B1	0	0	0	0	0	0.455166	0.464695	0.884703	1.01147	1.0526	0.50011	0	1.22041	0	0.444014	0	0.474314	0	0	1.59246
WFIKKN1	0.471875	0	0.589325	0.389941	0.403657	0.359511	0.734576	1.03843	0.197641	0.617183	0.586993	1.06182	0.794148	0.855589	0.693711	1.11779	0.924548	0.35285	0.361523	0.414453
TOB1	126.634	128.969	132.454	140.279	125.702	35.4826	31.0434	36.9004	44.6312	35.0049	31.6476	25.2782	26.5256	31.0943	28.5989	27.9812	32.2423	29.2773	34.7417	30.0374
SPAG9	22.9655	25.536	22.2066	23.5791	26.492	7.78381	8.11817	10.0105	10.2841	7.86922	6.44202	6.53545	7.83815	9.81321	7.01747	7.5399	7.88783	6.90656	8.0453	9.21269
DAGLB	13.6756	18.1756	13.6583	17.3205	17.9306	9.54896	7.27242	11.1976	9.92407	9.53558	4.34571	6.83569	7.20827	12.062	8.87564	11.5133	10.177	8.68856	7.33139	10.8054
KDELR2	28.2592	33.9735	32.1405	28.5078	36.9399	22.6749	20.9062	22.5411	29.932	24.6328	25.8282	26.7852	24.6249	22.9147	27.4939	32.1498	32.6016	28.5727	30.2089	30.3045
METTL9	27.438	30.3277	33.0219	34.0483	32.6153	20.4601	23.4898	22.525	27.6535	23.6525	9.54952	12.2839	11.1983	10.7655	11.0986	9.0929	10.8317	10.5242	10.9781	9.66546
CDR2	0	0.353049	0	0	0.225588	1.40543	3.07664	1.93449	3.31394	2.98955	2.84312	3.75828	3.3736	4.97374	2.32645	6.03921	5.16841	3.54964	3.03042	5.55991
POLR3E	138.137	158.366	154.56	153.319	161.424	43.1231	37.4591	49.683	56.5862	44.2848	36.9953	33.7057	36.1536	39.1851	39.3599	45.7563	56.4858	43.0937	43.5415	54.1726
RAB26	4.07857	2.07265	4.07629	6.81401	5.59857	1.20427	0	3.60295	2.75515	5.73056	4.07374	1.22762	1.11104	1.19797	0	0	0	0	0	0
SOX8	0	0.150053	0	0	0	0.170556	0	0	0	0	0	0	0	0	0	0	0	0	0	0
LMF1	14.4359	16.3537	19.663	15.6625	16.9147	5.43479	2.56244	6.6481	3.45125	6.2268	2.50531	3.29589	3.6984	2.19154	3.83624	6.94007	7.32082	3.69665	4.20772	6.03174
PEMT	13.0741	11.8119	14.8493	10.1881	9.22896	10.2366	7.88667	8.23699	7.93038	7.10311	2.73888	3.4681	3.11231	2.23538	4.69306	1.04306	1.89783	1.15245	0.674769	1.35355
RASD1	0	1.82889	0.764097	0	0.392687	8.34706	16.3378	9.09283	18.8576	13.2178	26.271	25.481	30.9452	31.0096	35.1324	83.4312	84.7397	64.5559	81.2018	83.9847
MED9	18.4466	19.3716	15.6168	13.1123	15.5537	69.9885	67.3856	50.7772	53.1302	58.3634	74.9212	57.6361	60.5415	69.9289	61.7617	71.4062	65.5093	60.1192	73.1887	56.2793
COPS3	103.507	114.786	98.8636	107.791	106.786	52.293	49.9301	46.6191	45.7952	41.7782	68.8288	61.1211	66.1289	64.7379	64.4541	82.1852	88.339	99.0154	74.3652	75.753
USP22	21.7419	24.8544	21.0573	23.7961	23.4115	6.5971	6.11664	7.7483	5.22723	5.58091	8.22878	8.64322	12.4921	11.4857	10.9366	12.1288	13.5362	12.2056	12.9998	15.0337
SSTR2	0	0	0	0	0	0	0	0	0	0	0	0	0	0	0	0	0.640674	0	0	0.358764
SLC39A11	7.24402	11.1034	10.7438	13.8479	10.2254	5.06916	4.80673	4.5601	6.01318	2.08608	0.396574	1.43463	1.61178	1.04203	1.05568	1.51141	0.751323	1.43068	1.46449	2.52368
SOX9	0.851763	0.214206	0.534048	0.265192	1.09756	0.487724	0.996391	0.470608	1.88145	1.67857	1.06409	2.16539	1.9444	2.32771	2.59468	4.05357	6.54178	8.87575	4.66834	4.79201
VSTM4	0	0	0	0	0	0	0	0	0	0	0	0	0	0	0	0	0	0	0	0
LRRC18	0	0	0	0	0	0	0	0.292857	0	0	0.66218	0	0.269008	0	0.587361	0	0	0	0	0
ARHGAP22	0	0	0	0	0	0.198565	1.21711	0.573911	0	0	0	0.195611	0.526758	1.13504	0.191719	0.205938	0.408876	0	0.399579	0.68727
MAPK8	13.981	16.7331	12.0644	16.9306	12.823	9.13329	8.74746	9.52991	12.7668	10.457	6.00853	7.49578	9.25096	8.51705	6.24429	10.8504	10.3789	14.9456	5.35927	8.33917
FRMPD2	0	0	0	0	0	0	0	0	0	0	0	0	0	0	0	0	0	0	0	0
GDF10	0.580186	0	0	0	0.376009	0	0	0.322466	0	0.767011	0.364565	0.989137	0.592547	0	0.646865	0.347315	1.03563	0	0.336608	0
RBP3	0	0	0	0	0	0	0	0	0	0	0	0	0	0	0	0	0	0	0	0
RBP3	0.636044	0.95908	0.794456	0.39426	0.408123	0	0.371326	0.349974	0.399658	0.624016	0.593488	0.357856	0.160589	0.346028	0.350697	0	0.18696	0.356755	0.18276	0.209523
[truncated: 14,893 more rows]
