# Supplementary material for: A zebrafish embryo screen utilizing gastrulation identifies the HTR2C inhibitor pizotifen as a suppressor of EMT-mediated metastasis
Source: eLife. 2021 Dec 17;10:e70151. doi: 10.7554/eLife.70151 (PMC8824480; doi:10.7554/eLife.70151)
Supplement: Source data 2. [file elife-70151-data2.xlsx]

## Sheet: 50epi
NAME	NES	P
iNOTCH_SIGNALING	1.87507	0
hAPOPTOSIS	1.64381	0
gTGF_BETA_SIGNALING	1.5548	0
fEPITHELIAL_MESENCHYMAL_TRANSITION	1.52584	0
eTNFA_SIGNALING_VIA_NFKB	1.50991	0
dCOAGULATION	1.45529	0
cAPICAL_SURFACE	1.38163	0.0739958
bP53_PATHWAY	1.32208	0.0323232
aWNT_BETA_CATENIN_SIGNALING	1.30397	0.153846

## Sheet: shield
NAME	NES	P
hNOTCH_SIGNALING	1.93689	0
gTGF_BETA_SIGNALING	1.55154	0
fAPOPTOSIS	1.43498	0
eCOAGULATION	1.41218	0
dAPICAL_SURFACE	1.40947	0.0289017
cWNT_BETA_CATENIN_SIGNALING	1.36869	0.0998117
bEPITHELIAL_MESENCHYMAL_TRANSITION	1.30976	0.0917969
aESTROGEN_RESPONSE_EARLY	1.26644	0.093985

## Sheet: 75epi
NAME	NES	P
iWNT_BETA_CATENIN_SIGNALING	1.70294	0.0120724
hTGF_BETA_SIGNALING	1.69711	0
gNOTCH_SIGNALING	1.65333	0
fAPICAL_SURFACE	1.47525	0.0469388
eEPITHELIAL_MESENCHYMAL_TRANSITION	1.41933	0
dMYC_TARGETS_V2	1.35556	0.104628
cAPOPTOSIS	1.34588	0.0907258
bCOAGULATION	1.34202	0.0270833
aMYC_TARGETS_V1	1.28506	0.192308
